# Supplementary material for: RNA editing at a limited number of sites is sufficient to prevent MDA5 activation in the mouse brain
Source: PLoS Genet. 2021 May 13;17(5):e1009516. doi: 10.1371/journal.pgen.1009516 (PMC8118328; doi:10.1371/journal.pgen.1009516)
Supplement: S2 Table — (XLSX) [file pgen.1009516.s005.xlsx]

## Sheet: Table S2
	S2 Table. List of RNA editing sites identified by total RNA-seq analysis.
												Adar1p110+/+Adar2+/+(1)_Brain		Adar1p110+/+Adar2+/+(2)_Brain		Adar1p110-/-Adar2+/+(1)_Brain		Adar1p110-/-Adar2+/+(2)_Brain		Adar1p110-/-Adar2-/-(1)_Brain		Adar1p110-/-Adar2-/-(2)_Brain		Adar1p110+/+Adar2+/+(1)_Thymus		Adar1p110+/+Adar2+/+(2)_Thymus		Adar1p110-/-Adar2+/+(1)_Thymus		Adar1p110-/-Adar2+/+(2)_Thymus		Adar1p110-/-Adar2-/-(1)_Thymus		Adar1p110-/-Adar2-/-(2)_Thymus
	Chromosome	Position (GRCm38/mm10)	Ref	Alt	Func.refGene	Gene.refGene	RADAR	Repetitive (RADAR)	DARNED	REDIportal	Repetitive (REDIportal)	Read_count	Editing_ratio	Read_count	Editing_ratio	Read_count	Editing_ratio	Read_count	Editing_ratio	Read_count	Editing_ratio	Read_count	Editing_ratio	Read_count	Editing_ratio	Read_count	Editing_ratio	Read_count	Editing_ratio	Read_count	Editing_ratio	Read_count	Editing_ratio	Read_count	Editing_ratio
	1	3253400	T	C	intronic	Xkr4	.	.	.	REDI	repetitive	6	0.5	3	0	6	0	2	0	3	0	4	0	N/A	N/A	N/A	N/A	1	0	2	0	N/A	N/A	1	0
	1	3253415	T	C	intronic	Xkr4	.	.	.	REDI	repetitive	5	0.4	3	0	4	0.5	1	0	1	0	3	0	N/A	N/A	N/A	N/A	1	0	1	0	N/A	N/A	1	0
	1	3253437	T	C	intronic	Xkr4	.	.	.	REDI	non-repetitive	7	0.286	4	0	3	0	3	0	3	0	3	0	N/A	N/A	N/A	N/A	1	0	N/A	N/A	N/A	N/A	1	0
	1	3253893	T	C	intronic	Xkr4	.	.	.	REDI	non-repetitive	7	0	1	0	2	1	3	0	1	0	2	0	N/A	N/A	N/A	N/A	N/A	N/A	N/A	N/A	2	0	N/A	N/A
	1	3264779	T	C	intronic	Xkr4	.	.	.	REDI	repetitive	1	0	5	0.4	4	0	5	0	11	0	2	0	N/A	N/A	N/A	N/A	N/A	N/A	N/A	N/A	N/A	N/A	2	0
	1	3264786	T	C	intronic	Xkr4	.	.	.	REDI	repetitive	1	0	4	0.5	4	0	4	0.5	10	0	2	0	N/A	N/A	N/A	N/A	N/A	N/A	N/A	N/A	N/A	N/A	1	0
	1	3287941	T	C	intronic	Xkr4	.	.	.	REDI	repetitive	6	0	1	0	1	0	2	1	2	0	N/A	N/A	N/A	N/A	N/A	N/A	N/A	N/A	2	0	N/A	N/A	N/A	N/A
	1	3385116	T	C	intronic	Xkr4	.	.	.	REDI	repetitive	N/A	N/A	3	0.667	2	0	3	0	2	0	3	0	1	0	N/A	N/A	1	0	N/A	N/A	N/A	N/A	N/A	N/A
	1	3540182	T	C	intronic	Xkr4	.	.	.	REDI	repetitive	6	0	3	1	5	0	N/A	N/A	6	0	1	0	1	0	1	0	N/A	N/A	N/A	N/A	N/A	N/A	N/A	N/A
	1	3544079	T	C	intronic	Xkr4	.	.	.	REDI	repetitive	4	0	9	0	14	0	4	0.5	8	0	2	0	1	0	2	0	1	0	1	0	1	0	2	0
	1	3545400	T	C	intronic	Xkr4	.	.	.	REDI	repetitive	4	0.5	5	0	8	0	6	0	3	0	3	0	N/A	N/A	N/A	N/A	1	0	2	0	N/A	N/A	2	0
	1	3545433	T	C	intronic	Xkr4	.	.	.	REDI	repetitive	5	0.4	5	0	9	0	5	0	3	0	6	0	N/A	N/A	N/A	N/A	1	0	1	0	N/A	N/A	2	0
	1	3545602	T	C	intronic	Xkr4	.	.	.	REDI	repetitive	8	0.375	3	0	8	0	8	0.25	7	0	13	0	N/A	N/A	3	0	2	0	2	0	4	0	3	0
	1	3545608	T	C	intronic	Xkr4	.	.	.	REDI	repetitive	8	0.375	3	0	9	0	8	0	6	0	12	0	N/A	N/A	3	0	4	0	1	0	3	0	3	0
	1	4687972	T	C	intergenic	Sox17;Mrpl15	.	.	.	REDI	non-repetitive	1	0	2	1	N/A	N/A	2	1	1	0	1	0	1	0	2	0	N/A	N/A	5	0	1	0	1	0
	1	4780201	T	C	intronic	Mrpl15	.	.	.	REDI	repetitive	9	0	12	0.25	7	0	7	0	3	0	6	0	9	0	8	0	10	0	8	0	8	0	11	0
	1	4841542	A	G	intronic	Lypla1	.	.	.	REDI	repetitive	5	0.4	N/A	N/A	5	0	1	0	3	0	1	0	3	0	7	0	2	0	16	0	12	0	1	0
	1	4859588	A	G	intronic	Tcea1	.	.	.	REDI	repetitive	9	0.444	9	0.333	4	0	7	0	9	0	7	0	9	0	5	0	4	0	N/A	N/A	11	0	7	0
	1	4880877	A	G	intronic	Tcea1	.	.	.	REDI	repetitive	3	0	4	0	4	0	4	0	3	0	5	0	7	0	10	0.2	9	0	13	0	4	0	2	0
	1	4880878	A	G	intronic	Tcea1	.	.	.	REDI	repetitive	3	0	4	0	4	0	6	0	3	0	5	0	8	0	10	0.2	9	0	13	0	4	0	2	0
	1	4889278	A	G	intronic	Tcea1	.	.	.	REDI	repetitive	17	0.235	19	0	6	0	10	0	20	0	25	0	27	0	16	0	26	0	18	0	31	0	26	0
	1	4964562	T	C	intronic	Rgs20	.	.	.	REDI	repetitive	2	0	5	0	2	0	4	0.5	N/A	N/A	4	0	N/A	N/A	N/A	N/A	N/A	N/A	1	0	N/A	N/A	2	0
	1	5154403	A	G	intronic	Atp6v1h	.	.	.	REDI	repetitive	1	0	3	0	2	0	5	0	2	0	7	0	11	0	5	0.4	6	0	11	0	5	0	6	0
	1	5156464	A	G	intronic	Atp6v1h	.	.	.	REDI	repetitive	1	0	1	0	3	0.667	2	0	3	0	13	0	9	0	4	0	2	0	2	0	7	0	9	0
	1	6210128	T	C	intergenic	Npbwr1;Rb1cc1	.	.	.	REDI	repetitive	9	0.556	6	0.333	7	0	4	0	4	0	3	0	7	0.429	13	0.231	11	0	20	0	4	0	6	0
	1	7379175	T	C	intergenic	Pcmtd1;Sntg1	RADAR	repetitive	DARNED	REDI	repetitive	4	0.5	N/A	N/A	N/A	N/A	N/A	N/A	1	0	N/A	N/A	N/A	N/A	N/A	N/A	2	0	N/A	N/A	N/A	N/A	N/A	N/A
	1	8824438	T	C	intronic	Sntg1	.	.	.	REDI	repetitive	1	1	N/A	N/A	1	0	N/A	N/A	2	0	N/A	N/A	N/A	N/A	N/A	N/A	N/A	N/A	N/A	N/A	N/A	N/A	N/A	N/A
	1	8983145	T	C	intronic	Sntg1	.	.	.	REDI	repetitive	N/A	N/A	1	0	3	0	N/A	N/A	N/A	N/A	N/A	N/A	N/A	N/A	N/A	N/A	N/A	N/A	N/A	N/A	3	0	N/A	N/A
	1	8983200	T	C	intronic	Sntg1	.	.	.	REDI	repetitive	N/A	N/A	1	0	2	1	N/A	N/A	N/A	N/A	N/A	N/A	N/A	N/A	N/A	N/A	N/A	N/A	N/A	N/A	N/A	N/A	N/A	N/A
	1	8985079	T	C	intronic	Sntg1	.	.	.	REDI	repetitive	N/A	N/A	1	0	3	0.667	N/A	N/A	N/A	N/A	N/A	N/A	N/A	N/A	N/A	N/A	N/A	N/A	N/A	N/A	N/A	N/A	N/A	N/A
	1	9116906	T	C	intronic	Sntg1	.	.	.	REDI	repetitive	1	0	1	0	3	0.667	1	0	N/A	N/A	N/A	N/A	N/A	N/A	N/A	N/A	N/A	N/A	N/A	N/A	1	0	1	0
	1	9173428	T	C	intronic	Sntg1	.	.	.	REDI	repetitive	N/A	N/A	2	1	N/A	N/A	N/A	N/A	N/A	N/A	1	0	N/A	N/A	N/A	N/A	N/A	N/A	N/A	N/A	N/A	N/A	N/A	N/A
	1	9173446	T	C	intronic	Sntg1	.	.	.	REDI	repetitive	N/A	N/A	2	1	N/A	N/A	N/A	N/A	N/A	N/A	1	0	N/A	N/A	N/A	N/A	N/A	N/A	N/A	N/A	N/A	N/A	N/A	N/A
	1	9174162	T	C	intronic	Sntg1	.	.	.	REDI	repetitive	3	0.333	1	0	2	0	N/A	N/A	N/A	N/A	1	0	N/A	N/A	1	0	N/A	N/A	N/A	N/A	1	0	2	0
	1	9270915	T	C	intronic	Sntg1	.	.	.	REDI	repetitive	N/A	N/A	2	0	2	1	1	0	1	0	1	0	N/A	N/A	N/A	N/A	N/A	N/A	N/A	N/A	2	0	2	0
	1	9550209	A	G	intronic	Adhfe1	.	.	.	REDI	repetitive	1	0	2	1	2	0	1	0	2	0	7	0	5	0	3	0.333	2	0	N/A	N/A	2	0	2	0
	1	9550215	A	G	intronic	Adhfe1	.	.	.	REDI	repetitive	1	0	2	1	2	0	1	0	2	0	6	0	4	0	2	0.5	2	0	N/A	N/A	2	0	2	0
	1	9550223	A	G	intronic	Adhfe1	.	.	.	REDI	repetitive	1	0	2	0	2	0	4	0	3	0	6	0	4	0	3	0.667	2	0	N/A	N/A	2	0	2	0
	1	9730910	T	C	intronic	Vcpip1	.	.	.	REDI	repetitive	5	0	1	0	3	0	3	0.667	2	0	2	0	4	0	9	0	3	0	15	0	10	0	4	0
	1	10031028	T	C	intronic	Cops5	.	.	.	REDI	repetitive	9	0.556	11	0.636	14	0	14	0	12	0	27	0	12	0.25	13	0.154	19	0	24	0	24	0	27	0
	1	10097393	A	G	intronic	Cspp1	.	.	.	REDI	repetitive	4	0.75	2	1	1	0	N/A	N/A	4	0	4	0	8	0	10	0	10	0	27	0	4	0	4	0
	1	10097394	A	G	intronic	Cspp1	.	.	.	REDI	repetitive	4	0.75	2	1	1	0	N/A	N/A	4	0	4	0	8	0	10	0	10	0	27	0	4	0	4	0
	1	10097410	A	G	intronic	Cspp1	.	.	.	REDI	repetitive	4	1	2	0	1	0	N/A	N/A	4	0	1	0	7	0	9	0	10	0	30	0	5	0	5	0
	1	10098444	A	G	intronic	Cspp1	.	.	.	REDI	non-repetitive	6	0.333	6	0	3	0	N/A	N/A	6	0	2	0	8	0	11	0	6	0	13	0	2	0	1	0
	1	10168216	T	C	intronic	Arfgef1	.	.	.	REDI	repetitive	7	0.286	7	0	3	0	1	0	8	0	1	0	14	0	12	0	22	0	9	0	12	0	5	0
	1	10200689	T	C	intronic	Arfgef1	.	.	.	REDI	non-repetitive	2	0	1	0	1	0	N/A	N/A	1	0	2	0	9	0.222	12	0.25	6	0	7	0	9	0	11	0
	1	10200708	T	C	intronic	Arfgef1	.	.	.	REDI	non-repetitive	3	0	1	0	2	0	N/A	N/A	3	0	2	0	9	0	12	0.25	6	0	6	0	11	0	11	0
	1	11596989	A	G	UTR3	A830018L16Rik	RADAR	repetitive	DARNED	REDI	repetitive	28	0	29	0	21	0	20	0	26	0	28	0	N/A	N/A	N/A	N/A	N/A	N/A	2	1	3	0	N/A	N/A
	1	11597052	A	G	UTR3	A830018L16Rik	RADAR	repetitive	DARNED	REDI	repetitive	57	0	44	0	30	0	30	0	38	0	47	0	2	0	3	0	N/A	N/A	3	0.333	5	0	N/A	N/A
	1	11917441	A	G	intronic	A830018L16Rik	.	.	.	REDI	repetitive	1	0	2	1	N/A	N/A	N/A	N/A	N/A	N/A	N/A	N/A	N/A	N/A	N/A	N/A	N/A	N/A	1	0	N/A	N/A	N/A	N/A
	1	11917445	A	G	intronic	A830018L16Rik	.	.	.	REDI	repetitive	1	0	2	1	N/A	N/A	N/A	N/A	N/A	N/A	N/A	N/A	N/A	N/A	N/A	N/A	N/A	N/A	1	0	N/A	N/A	N/A	N/A
	1	13625006	T	C	downstream	Lactb2	.	.	.	REDI	repetitive	4	0	3	0	7	0	7	0	13	0	10	0.2	11	0	14	0.214	8	0	31	0	13	0	9	0
	1	13625010	T	C	downstream	Lactb2	.	.	.	REDI	repetitive	5	0	3	0	7	0.286	10	0	14	0	12	0	14	0	14	0.143	8	0	33	0	13	0.154	13	0.308
	1	13625013	T	C	downstream	Lactb2	.	.	.	REDI	repetitive	5	0	2	1	8	0	10	0	14	0	12	0.167	14	0	15	0	8	0	33	0	13	0	13	0.154
	1	13625015	T	C	downstream	Lactb2	.	.	.	REDI	repetitive	4	0.75	3	0	7	0.286	10	0	12	0.333	12	0.167	14	0.286	15	0.133	8	0	31	0.161	13	0.231	13	0.154
	1	13625036	T	C	downstream	Lactb2	RADAR	repetitive	.	REDI	repetitive	4	0.5	3	0	9	0	9	0	15	0.133	15	0	17	0	19	0	11	0	33	0	13	0.231	12	0
	1	13625722	T	C	downstream	Lactb2	.	.	.	REDI	repetitive	11	0.364	5	0.4	6	0	10	0	6	0	9	0	15	0	25	0	19	0	24	0	18	0	10	0.3
	1	13625735	T	C	downstream	Lactb2	.	.	.	REDI	repetitive	15	0	9	0	6	0.333	10	0	5	0.4	14	0	18	0	28	0	21	0	25	0.32	19	0	15	0.2
	1	13625738	T	C	downstream	Lactb2	.	.	.	REDI	repetitive	15	0	9	0	11	0	10	0	7	0	14	0	18	0	23	0.174	22	0	26	0	19	0	15	0
	1	13625741	T	C	downstream	Lactb2	.	.	.	REDI	repetitive	9	0.333	6	0.5	7	1	4	0.5	5	0.4	14	0	18	0	23	0.261	17	0.294	25	0.28	19	0	14	0.357
	1	14248863	T	C	intronic	Eya1	.	.	.	REDI	non-repetitive	N/A	N/A	N/A	N/A	1	0	N/A	N/A	N/A	N/A	N/A	N/A	8	0	1	0	1	0	2	1	6	0	1	0
	1	14248870	T	C	intronic	Eya1	.	.	.	REDI	non-repetitive	N/A	N/A	N/A	N/A	1	0	N/A	N/A	N/A	N/A	N/A	N/A	8	0.25	1	0	1	0	2	1	5	0	1	0
	1	15486620	A	G	intronic	Kcnb2	.	.	.	REDI	repetitive	3	1	3	0	N/A	N/A	1	0	N/A	N/A	1	0	N/A	N/A	N/A	N/A	N/A	N/A	N/A	N/A	N/A	N/A	3	0
	1	15499218	A	G	intronic	Kcnb2	.	.	.	REDI	repetitive	4	0	4	0	2	1	N/A	N/A	2	0	4	0	N/A	N/A	N/A	N/A	N/A	N/A	N/A	N/A	2	0	N/A	N/A
	1	16081719	T	C	UTR5	4930444P10Rik	.	.	.	REDI	repetitive	N/A	N/A	1	0	2	1	N/A	N/A	1	0	3	0	N/A	N/A	N/A	N/A	1	0	1	0	N/A	N/A	N/A	N/A
	1	16313081	T	C	intronic	Stau2	.	.	.	REDI	non-repetitive	2	0	4	0.5	N/A	N/A	1	0	3	0	2	0	1	0	1	0	N/A	N/A	N/A	N/A	N/A	N/A	1	0
	1	16387478	T	C	intronic	Stau2	.	.	.	REDI	repetitive	6	0.333	11	0	2	0	3	0	2	0	7	0	N/A	N/A	N/A	N/A	2	0	2	0	N/A	N/A	1	0
	1	16420773	T	C	intronic	Stau2	.	.	.	REDI	repetitive	4	0.5	6	0	4	0	3	0	3	0	4	0	N/A	N/A	N/A	N/A	1	0	N/A	N/A	N/A	N/A	N/A	N/A
	1	16561829	T	C	intronic	Ube2w	RADAR	repetitive	DARNED	REDI	repetitive	5	0	6	0.333	9	0	9	0	6	0	3	0	1	0	15	0	4	0	8	0	N/A	N/A	2	0
	1	16584311	T	C	intronic	Ube2w	.	.	.	REDI	repetitive	9	0	5	0.4	2	0	1	0	3	0	4	0	11	0.182	5	0	10	0	7	0	4	0	7	0
	1	16646836	T	C	intronic	Eloc	.	.	.	REDI	repetitive	13	0.308	16	0	3	0	11	0	3	0	10	0	5	0	16	0	1	0	14	0	4	0	1	0
	1	17637482	T	C	intergenic	Pi15;Gm16070	RADAR	repetitive	DARNED	REDI	repetitive	2	0	2	1	5	0	N/A	N/A	N/A	N/A	N/A	N/A	N/A	N/A	N/A	N/A	N/A	N/A	N/A	N/A	1	0	N/A	N/A
	1	17637485	T	C	intergenic	Pi15;Gm16070	RADAR	repetitive	DARNED	REDI	repetitive	2	0	2	1	5	0	N/A	N/A	N/A	N/A	N/A	N/A	N/A	N/A	N/A	N/A	N/A	N/A	N/A	N/A	1	0	N/A	N/A
	1	17637515	T	C	intergenic	Pi15;Gm16070	RADAR	repetitive	DARNED	REDI	repetitive	2	0	2	1	4	0	N/A	N/A	N/A	N/A	N/A	N/A	N/A	N/A	N/A	N/A	N/A	N/A	N/A	N/A	1	0	N/A	N/A
	1	17638126	T	C	intergenic	Pi15;Gm16070	RADAR	repetitive	DARNED	REDI	repetitive	N/A	N/A	2	1	1	0	N/A	N/A	N/A	N/A	N/A	N/A	N/A	N/A	N/A	N/A	2	0	N/A	N/A	N/A	N/A	N/A	N/A
	1	17971811	T	C	intergenic	Crispld1;Crisp4	.	.	.	REDI	repetitive	4	0	2	0	5	0.4	1	0	1	0	1	0	1	0	N/A	N/A	N/A	N/A	N/A	N/A	N/A	N/A	N/A	N/A
	1	21685286	T	C	intronic	Kcnq5	.	.	.	REDI	repetitive	2	1	N/A	N/A	2	0	N/A	N/A	1	0	1	0	1	0	N/A	N/A	N/A	N/A	4	0	1	0	2	0
	1	21787280	T	C	intronic	Kcnq5	.	.	.	REDI	repetitive	2	1	1	0	2	0	4	0	9	0	N/A	N/A	7	0	6	0.333	6	0	1	0	4	0	4	0
	1	21787299	T	C	intronic	Kcnq5	.	.	.	REDI	repetitive	3	0	1	0	2	1	4	0	6	0	N/A	N/A	9	0	6	0	7	0	1	0	8	0	4	0
	1	21935274	T	C	intronic	Kcnq5	.	.	.	REDI	repetitive	2	0	5	0	6	0.333	3	0	8	0	6	0	9	0	8	0	4	0	9	0	6	0	5	0
	1	22321253	T	C	intronic	Rims1	.	.	.	REDI	repetitive	N/A	N/A	N/A	N/A	2	1	4	0.25	N/A	N/A	1	0	N/A	N/A	N/A	N/A	N/A	N/A	N/A	N/A	N/A	N/A	N/A	N/A
	1	22590295	T	C	intronic	Rims1	.	.	.	REDI	repetitive	6	0	5	0.4	1	0	2	0	N/A	N/A	4	0	N/A	N/A	N/A	N/A	N/A	N/A	N/A	N/A	N/A	N/A	1	0
	1	22590324	T	C	intronic	Rims1	.	.	.	REDI	repetitive	4	0	5	0.4	2	0	3	0	N/A	N/A	3	0	N/A	N/A	N/A	N/A	N/A	N/A	N/A	N/A	N/A	N/A	1	0
	1	22705234	T	C	intronic	Rims1	.	.	.	REDI	non-repetitive	5	0.4	3	0	6	0	2	0	5	0	7	0	N/A	N/A	N/A	N/A	N/A	N/A	N/A	N/A	N/A	N/A	N/A	N/A
	1	22774586	T	C	intronic	Rims1	.	.	.	REDI	repetitive	5	0	8	0.25	6	0	5	0	5	0	11	0	N/A	N/A	N/A	N/A	N/A	N/A	N/A	N/A	1	0	N/A	N/A
	1	23875190	T	C	intronic	Smap1	.	.	.	REDI	repetitive	17	0	16	0	15	0	11	0.182	16	0	13	0	15	0	28	0	17	0	24	0	11	0	8	0
	1	23875257	T	C	intronic	Smap1	.	.	.	REDI	repetitive	17	0.941	8	0.25	19	0	12	0	13	0	12	0	12	0	28	0	14	0	29	0	15	0	14	0
	1	23875266	T	C	intronic	Smap1	.	.	.	REDI	repetitive	20	0.3	8	0	20	0	10	0	16	0	10	0	11	0	32	0	15	0	28	0	17	0	15	0
	1	24051527	T	C	intronic	Fam135a	.	.	.	REDI	repetitive	6	0	4	0.75	4	0	4	0	8	0	3	0	4	0	1	0	2	0	3	0	5	0	2	0
	1	24051529	T	C	intronic	Fam135a	.	.	.	REDI	repetitive	4	1	3	1	4	0	4	0.75	8	0	3	0	2	1	1	0	2	0.5	3	1	5	0	2	0
	1	24051550	T	C	intronic	Fam135a	.	.	.	REDI	repetitive	6	0	5	0.8	9	0	5	0	9	0	4	0	3	0.667	1	0	5	0	3	0	5	0	2	0
	1	24051566	T	C	intronic	Fam135a	.	.	.	REDI	repetitive	10	0	6	0.333	9	0	5	0	11	0	4	0	3	0	2	0	6	0	5	0	4	0	2	0
	1	24052688	T	C	intronic	Fam135a	.	.	.	REDI	repetitive	10	0.5	11	0.545	17	0	16	0	27	0	14	0	7	0	1	0	7	0	1	0	6	0	3	0
	1	25301778	T	C	intronic	Adgrb3	.	.	.	REDI	non-repetitive	1	0	4	0.5	4	0	4	0	2	0	2	0	N/A	N/A	N/A	N/A	N/A	N/A	N/A	N/A	N/A	N/A	1	0
	1	25393823	T	C	intronic	Adgrb3	.	.	.	REDI	repetitive	5	0	6	0.333	12	0	3	0	8	0	6	0	N/A	N/A	N/A	N/A	N/A	N/A	N/A	N/A	1	0	N/A	N/A
	1	25770533	T	C	intronic	Adgrb3	.	.	.	REDI	repetitive	18	0	9	0.222	14	0	9	0	12	0	14	0	N/A	N/A	N/A	N/A	N/A	N/A	N/A	N/A	1	0	N/A	N/A
	1	25772952	T	C	intronic	Adgrb3	.	.	.	REDI	repetitive	8	0.25	10	0	13	0	11	0	9	0	20	0	N/A	N/A	N/A	N/A	N/A	N/A	N/A	N/A	4	0	2	0
	1	25773070	T	C	intronic	Adgrb3	RADAR	repetitive	DARNED	REDI	repetitive	15	0.267	9	0	11	0	9	0	11	0	20	0	N/A	N/A	N/A	N/A	N/A	N/A	N/A	N/A	1	0	2	0
	1	33769476	T	C	intronic	Zfp451	RADAR	repetitive	DARNED	REDI	repetitive	8	0	15	0.133	9	0	4	0	6	0	14	0	10	0	9	0	5	0	15	0	8	0	6	0
	1	33787059	T	C	intronic	Zfp451	.	.	.	REDI	repetitive	4	0.75	6	0.5	5	0	8	0	2	0	5	0	8	0	7	0	7	0	12	0	2	0	1	0
	1	33795208	T	C	intronic	Zfp451	RADAR	repetitive	DARNED	REDI	repetitive	64	0.172	77	0	55	0	52	0	65	0	47	0	32	0	20	0	22	0	40	0	6	0	7	0
	1	33876273	T	C	intronic	Bend6	.	.	.	REDI	repetitive	5	0.4	7	0.286	1	0	1	0	3	0	2	0	N/A	N/A	N/A	N/A	N/A	N/A	N/A	N/A	2	0	N/A	N/A
	1	34772029	A	G	intergenic	AA619741;Arhgef4	.	.	.	REDI	repetitive	2	0	2	1	N/A	N/A	N/A	N/A	N/A	N/A	2	0	N/A	N/A	N/A	N/A	N/A	N/A	N/A	N/A	N/A	N/A	N/A	N/A
	1	34772066	A	G	intergenic	AA619741;Arhgef4	.	.	.	REDI	repetitive	3	0	2	1	N/A	N/A	N/A	N/A	N/A	N/A	2	0	N/A	N/A	N/A	N/A	N/A	N/A	N/A	N/A	N/A	N/A	N/A	N/A
	1	34772146	A	G	intergenic	AA619741;Arhgef4	.	.	.	REDI	repetitive	1	0	2	0	1	0	3	0.667	N/A	N/A	1	0	N/A	N/A	N/A	N/A	N/A	N/A	N/A	N/A	N/A	N/A	N/A	N/A
	1	34834411	T	C	intronic	Fam168b	.	.	.	REDI	repetitive	5	0	6	0.333	5	0	1	0	8	0	11	0	18	0	10	0	16	0	16	0	4	0	13	0
	1	34834457	T	C	intronic	Fam168b	.	.	.	REDI	repetitive	6	0.333	4	0	9	0	2	0	10	0	8	0	17	0	10	0	12	0	14	0	5	0	9	0
	1	34835604	T	C	intronic	Fam168b	.	.	.	REDI	repetitive	10	0.2	9	0.556	6	0.333	6	0.667	15	0	10	0	16	0.188	9	0.222	13	0	20	0	12	0	14	0
	1	34835608	T	C	intronic	Fam168b	.	.	.	REDI	repetitive	11	0	9	0	6	0.333	6	0.667	15	0	10	0	18	0	9	0	14	0	19	0	13	0	14	0
	1	36431957	T	C	intronic	Lman2l	.	.	.	REDI	repetitive	1	0	2	1	1	0	N/A	N/A	N/A	N/A	N/A	N/A	5	0	1	0	3	0	8	0	3	0	N/A	N/A
	1	36809428	T	C	intronic	Tmem131	.	.	.	REDI	repetitive	1	0	3	0	3	0.667	6	0.667	4	0	2	0	7	0	3	0	7	0	3	0	5	0	3	0
	1	36880257	T	C	intronic	Tmem131	.	.	.	REDI	repetitive	2	1	N/A	N/A	2	0	7	0	4	0	8	0	20	0	6	0	9	0	10	0	12	0	7	0
	1	36880259	T	C	intronic	Tmem131	.	.	.	REDI	repetitive	2	0	N/A	N/A	2	0	7	0.286	4	0	8	0	20	0	6	0	9	0	10	0	13	0	7	0
	1	36894200	T	C	intronic	Tmem131	.	.	.	REDI	non-repetitive	1	0	1	0	N/A	N/A	N/A	N/A	1	0	N/A	N/A	3	0	4	0.5	9	0	10	0	4	0	8	0
	1	37442393	T	C	UTR3	Mgat4a	.	.	.	REDI	non-repetitive	68	0	58	0	41	0	40	0	40	0	37	0	69	0	51	0	66	0	83	0.12	41	0	36	0
	1	37443158	T	C	UTR3	Mgat4a	.	.	.	REDI	non-repetitive	41	0	50	0	51	0	34	0	40	0	40	0	74	0	42	0	81	0	77	0.156	50	0	33	0
	1	37472854	T	C	intronic	Mgat4a	.	.	.	REDI	repetitive	2	0	2	0	4	0.5	2	0	3	0	N/A	N/A	17	0	17	0	13	0	14	0	4	0	7	0
	1	37475816	T	C	intronic	Mgat4a	.	.	.	REDI	repetitive	N/A	N/A	2	1	N/A	N/A	N/A	N/A	N/A	N/A	1	0	4	0	2	0	3	0	5	0	2	0	5	0
	1	37984677	T	C	UTR3	Txndc9	RADAR	repetitive	DARNED	REDI	repetitive	24	1	22	0.955	15	0.2	37	0.162	14	0	17	0	9	0.222	1	0	6	0	8	0	13	0	3	0
	1	38078640	T	C	intronic	Rev1	RADAR	repetitive	DARNED	REDI	repetitive	18	0	11	0.273	12	0	10	0	22	0	21	0	9	0	12	0	9	0	23	0	12	0	11	0
	1	38100378	T	C	intronic	Rev1	.	.	.	REDI	repetitive	6	0	1	0	3	0	4	0	3	0	5	0	6	0	8	0.25	2	0	9	0	1	0	5	0
	1	38415865	T	C	intronic	Aff3	.	.	.	REDI	repetitive	4	0.5	N/A	N/A	2	0	N/A	N/A	5	0	4	0	8	0	5	0	15	0	15	0	6	0	7	0
	1	38892232	T	C	intronic	Chst10	.	.	.	REDI	repetitive	2	1	2	0	N/A	N/A	3	0	3	0	5	0	3	0	1	0	6	0	7	0	4	0	1	0
	1	39381962	T	C	intronic	Tbc1d8	RADAR	repetitive	DARNED	REDI	repetitive	2	0	5	0.6	1	0	4	0	6	0	2	0	5	0	5	0	2	0	6	0	2	0	6	0
	1	39381970	T	C	intronic	Tbc1d8	RADAR	repetitive	DARNED	REDI	repetitive	2	0	5	0	1	0	4	0	6	0	2	0	5	0	5	0.4	2	0	6	0	3	0	6	0
	1	39382016	T	C	intronic	Tbc1d8	RADAR	repetitive	DARNED	REDI	repetitive	4	0.5	5	0	2	0	4	0	7	0	1	0	9	0	7	0	2	0	5	0	4	0	1	0
	1	39384112	T	C	intronic	Tbc1d8	RADAR	repetitive	DARNED	REDI	repetitive	4	0.5	4	0	1	0	3	0	4	0	2	0	9	0	2	0	1	0	1	0	1	0	3	0
	1	39453341	T	C	intronic	Tbc1d8	.	.	.	REDI	repetitive	2	1	3	0	N/A	N/A	N/A	N/A	N/A	N/A	4	0	N/A	N/A	N/A	N/A	1	0	N/A	N/A	1	0	N/A	N/A
	1	39453351	T	C	intronic	Tbc1d8	.	.	.	REDI	repetitive	3	0	3	0.667	1	0	N/A	N/A	N/A	N/A	4	0	N/A	N/A	N/A	N/A	1	0	N/A	N/A	1	0	N/A	N/A
	1	39561987	T	C	intronic	Rnf149	.	.	.	REDI	repetitive	2	0	6	0	3	0	N/A	N/A	9	0	4	0	11	0	12	0.25	2	0	10	0	13	0	8	0
	1	42864253	A	G	intronic	Mrps9	.	.	.	REDI	repetitive	5	0.4	1	0	N/A	N/A	5	0	3	0	1	0	12	0	3	0	3	0	6	0	2	0	6	0
	1	43770091	T	C	intronic	Uxs1	.	.	.	REDI	non-repetitive	2	0	1	0	1	0	3	0	2	0	2	0	6	0.333	4	0	4	0	2	0	4	0	2	0
	1	43808259	T	C	intronic	Uxs1	.	.	.	REDI	repetitive	5	0	4	0	1	0	4	0.75	7	0	6	0	4	0	4	0	7	0	4	0	4	0	9	0
	1	50923990	T	C	intergenic	NONE;Tmeff2	.	.	.	REDI	non-repetitive	12	0.417	7	0	8	0.375	6	0	10	0	2	0	N/A	N/A	N/A	N/A	N/A	N/A	N/A	N/A	N/A	N/A	1	0
	1	50996601	A	G	intronic	Tmeff2	.	.	.	REDI	repetitive	2	0	6	0.333	10	0	4	0	4	0	7	0	2	0	N/A	N/A	N/A	N/A	N/A	N/A	1	0	N/A	N/A
	1	51466998	T	C	intergenic	9330175M20Rik;Nabp1	RADAR	repetitive	DARNED	REDI	repetitive	2	0	N/A	N/A	N/A	N/A	N/A	N/A	1	0	3	0	23	0	99	0	27	0	168	0	22	0.136	23	0
	1	51468579	T	C	downstream	Nabp1	.	.	.	REDI	repetitive	2	1	2	0	2	0	N/A	N/A	3	0	5	0	63	0	139	0	60	0	203	0	34	0	38	0
	1	51818109	T	C	intronic	Myo1b	.	.	.	REDI	repetitive	2	1	2	1	1	0	1	0	N/A	N/A	3	0	2	0	1	0	N/A	N/A	N/A	N/A	N/A	N/A	2	0
	1	52187395	T	C	UTR3	Gls	.	.	.	REDI	repetitive	1	0	3	0	6	0	5	0	34	0	39	0	8	0	43	0.302	5	0	57	0.228	47	0.277	27	0.185
	1	53191910	T	C	intronic	Pms1	.	.	.	REDI	repetitive	N/A	N/A	N/A	N/A	N/A	N/A	N/A	N/A	1	0	N/A	N/A	N/A	N/A	7	0.571	1	0	6	0	6	0	3	0
	1	53191992	T	C	intronic	Pms1	.	.	.	REDI	repetitive	1	0	N/A	N/A	N/A	N/A	N/A	N/A	3	0	N/A	N/A	1	0	8	0	1	0	8	0	6	0	3	0.333
	1	53191997	T	C	intronic	Pms1	.	.	.	REDI	repetitive	2	0	N/A	N/A	N/A	N/A	N/A	N/A	3	0	N/A	N/A	1	0	8	0	1	0	9	0	5	0	3	0.333
	1	54165745	T	C	intronic	Hecw2	.	.	.	REDI	repetitive	2	1	1	0	N/A	N/A	1	0	1	0	1	0	N/A	N/A	N/A	N/A	N/A	N/A	2	1	2	0	1	0
	1	54168991	T	C	intronic	Hecw2	.	.	.	REDI	repetitive	1	0	2	1	1	0	2	0	1	0	1	0	N/A	N/A	N/A	N/A	N/A	N/A	1	0	1	0	N/A	N/A
	1	54374685	T	C	intergenic	Ccdc150;Gtf3c3	.	.	.	REDI	repetitive	N/A	N/A	1	0	1	0	2	1	N/A	N/A	2	0	2	0	N/A	N/A	2	0	N/A	N/A	1	0	N/A	N/A
	1	54374688	T	C	intergenic	Ccdc150;Gtf3c3	.	.	.	REDI	repetitive	N/A	N/A	1	0	1	0	2	1	N/A	N/A	2	0	2	0	N/A	N/A	2	0	N/A	N/A	1	0	N/A	N/A
	1	54397335	T	C	UTR3	Gtf3c3	.	.	.	REDI	repetitive	29	0	37	0	39	0	17	0	30	0	28	0	60	0	52	0.346	82	0.244	65	0.277	68	0.206	49	0.184
	1	54488746	T	C	intronic	Pgap1	.	.	.	REDI	repetitive	11	0.545	15	0	9	0	13	0.462	6	0	4	0	4	0	1	0	N/A	N/A	2	0	2	0	1	0
	1	54712515	T	C	intronic	Ankrd44	.	.	.	REDI	repetitive	1	0	2	0	N/A	N/A	N/A	N/A	1	0	N/A	N/A	7	0	13	0.154	9	0	23	0	11	0	14	0
	1	54875815	T	C	intronic	Ankrd44	.	.	.	REDI	repetitive	2	0	2	1	1	0	2	0	5	0	3	0	39	0	44	0	32	0	65	0	26	0	22	0
	1	55147830	A	G	intronic	Mob4	.	.	.	REDI	repetitive	7	0.286	3	0.667	4	0	9	0	13	0	8	0	25	0	13	0	17	0	21	0	30	0	23	0
	1	55572742	A	G	intronic	Plcl1	.	.	.	REDI	repetitive	5	0	N/A	N/A	2	0	1	0	6	0	5	0	12	0.25	16	0.188	14	0.286	48	0	6	0	9	0
	1	55572789	A	G	intronic	Plcl1	.	.	.	REDI	repetitive	3	0	N/A	N/A	2	0	1	0	7	0	2	0	10	0	18	0	13	0.154	29	0	4	0	5	0
	1	55573197	A	G	intronic	Plcl1	.	.	.	REDI	repetitive	3	0	2	0	5	0	3	0	1	0	N/A	N/A	19	0	14	0.286	9	0	17	0	3	0	8	0
	1	55573309	A	G	intronic	Plcl1	.	.	.	REDI	repetitive	N/A	N/A	4	0	N/A	N/A	N/A	N/A	1	0	6	0	9	0	13	0.231	11	0	27	0	2	0	3	0
	1	58396557	A	G	intronic	Bzw1	.	.	.	REDI	repetitive	12	0.25	12	0.25	12	0	9	0	7	0	12	0	13	0	16	0	4	0	27	0	15	0	14	0
	1	58407476	A	G	downstream	Bzw1	.	.	.	REDI	repetitive	5	0	13	0.231	8	0.5	13	0	14	0	12	0	9	0	5	0	13	0	4	0	23	0	11	0
	1	58408264	A	G	intergenic	Bzw1;Clk1	.	.	.	REDI	repetitive	13	0.385	5	0.6	4	0	5	0	10	0	10	0	7	0	3	0	14	0	3	0	10	0	11	0
	1	58439308	T	C	intronic	Ppil3	.	.	.	REDI	repetitive	5	0.8	4	0	2	0	1	0	5	0	3	0	4	0	2	0	2	0	7	0	6	0	4	0
	1	58448348	A	G	intronic	Nif3l1	.	.	.	REDI	repetitive	1	0	N/A	N/A	1	0	N/A	N/A	3	0	3	0	1	0	2	0	N/A	N/A	1	0	4	0.5	4	0
	1	58460142	T	C	intronic	Nif3l1	.	.	.	REDI	repetitive	2	0.5	7	0.857	6	0	7	0.571	8	0	8	0	3	0	1	0	5	0	6	0	3	0	2	0
	1	58460146	T	C	intronic	Nif3l1	.	.	.	REDI	repetitive	2	0.5	7	0.857	6	0	7	0.286	8	0	7	0	3	0.667	1	0	5	0	6	0	2	0	2	0
	1	58460164	T	C	intronic	Nif3l1	.	.	.	REDI	repetitive	2	0	6	0.833	8	0	6	0.333	7	0	6	0	5	0	1	0	5	0	6	0	2	0	1	0
	1	58460299	T	C	intronic	Nif3l1	.	.	.	REDI	repetitive	4	0	10	0.4	8	0.375	7	0.286	17	0	9	0	6	0.5	6	0	3	0.667	3	0.333	6	0.333	4	0
	1	58460374	T	C	intronic	Nif3l1	.	.	.	REDI	repetitive	6	0.667	8	0.375	16	0	11	0	12	0	9	0	4	0.5	7	0.571	2	0	5	0.6	3	0	2	0
	1	58532308	T	C	intronic	Fam126b	.	.	.	REDI	repetitive	9	0.333	10	0.3	3	0	10	0	18	0	14	0	22	0.136	16	0	34	0	16	0	32	0	24	0
	1	59210081	T	C	intronic	Als2	.	.	.	REDI	repetitive	6	0.833	4	0	4	0	3	0	5	0	5	0	5	0.6	4	0.5	11	0	5	0	11	0	7	0
	1	59210403	T	C	intronic	Als2	.	.	.	REDI	repetitive	N/A	N/A	N/A	N/A	1	0	2	1	4	0	4	0	2	0	1	0	1	0	6	0	6	0	3	0
	1	59210405	T	C	intronic	Als2	.	.	.	REDI	repetitive	N/A	N/A	N/A	N/A	1	0	2	0	4	0	4	0	2	0	1	0	1	0	6	0	5	0.4	3	0
	1	59688866	A	G	intronic	Nop58	.	.	.	REDI	repetitive	11	0	12	0	11	0	14	0.143	20	0	24	0	15	0	13	0	14	0	13	0.154	14	0	10	0
	1	59688879	A	G	intronic	Nop58	.	.	.	REDI	repetitive	14	0.286	14	0	12	0	14	0	20	0	25	0	17	0	14	0	14	0	17	0	15	0	13	0
	1	59689455	A	G	intronic	Nop58	.	.	.	REDI	repetitive	14	0	14	0.643	7	0	18	0	19	0	16	0	8	0	13	0	8	0	9	0	14	0	6	0
	1	59689456	A	G	intronic	Nop58	.	.	.	REDI	repetitive	14	0	14	0.5	7	0	18	0	19	0	16	0	8	0	13	0	8	0	9	0	14	0	6	0
	1	59697242	A	G	intronic	Nop58	.	.	.	REDI	repetitive	8	0	13	0.154	10	0	6	0	17	0	22	0	14	0	13	0	15	0	24	0	14	0	11	0
	1	59712975	A	G	intergenic	Nop58;Bmpr2	.	.	.	REDI	repetitive	43	0.209	54	0.167	21	0	47	0	47	0	31	0	1	0	N/A	N/A	4	0	N/A	N/A	8	0	7	0
	1	59874208	A	G	UTR3	Bmpr2	.	.	.	REDI	repetitive	157	0	119	0	124	0	109	0	106	0	91	0	55	0	17	0.353	59	0	33	0.545	39	0	27	0.222
	1	60138584	A	G	intronic	Carf	.	.	.	REDI	repetitive	9	0.333	3	0	4	0	5	0	5	0	6	0	19	0	3	0	12	0	7	0	16	0	3	0
	1	60151786	A	G	UTR3	Carf	RADAR	repetitive	DARNED	REDI	repetitive	51	0	48	0	57	0	46	0	38	0	37	0	40	0	21	0.238	41	0	29	0.138	50	0	22	0
	1	60232788	A	G	intronic	Nbeal1	.	.	.	REDI	repetitive	3	0	3	0.667	2	0	N/A	N/A	N/A	N/A	N/A	N/A	N/A	N/A	1	0	2	0	3	0	2	0	4	0
	1	60374458	A	G	intronic	Cyp20a1	.	.	.	REDI	repetitive	5	0	3	0	3	0	6	0.333	4	0	4	0	6	0	3	0	5	0	5	0	2	0	2	0
	1	60518821	T	C	intronic	Raph1	.	.	.	REDI	repetitive	4	0.5	10	0.5	10	0	5	0	3	0	16	0	6	0	1	0	1	0	2	0	8	0	5	0
	1	60558800	T	C	intronic	Raph1	.	.	.	REDI	repetitive	5	0	6	0.5	3	0	N/A	N/A	12	0	5	0	1	0	1	0	5	0	4	0	4	0	8	0
	1	61699869	A	G	intronic	Pard3b	.	.	.	REDI	repetitive	N/A	N/A	N/A	N/A	1	0	N/A	N/A	N/A	N/A	1	0	4	0	2	0	3	0.667	N/A	N/A	4	0	1	0
	1	63049607	T	C	UTR3	Ino80d	.	.	.	REDI	non-repetitive	15	0	21	0	29	0	17	0	16	0	16	0	50	0	63	0.206	65	0	78	0	18	0	24	0
	1	63117003	A	G	ncRNA_intronic	Ino80dos	RADAR	repetitive	DARNED	REDI	repetitive	17	0.765	13	0.923	6	0	9	0	11	0	9	0	12	0.167	13	0.538	12	0	20	0	8	0	6	0
	1	63117047	A	G	ncRNA_intronic	Ino80dos	RADAR	repetitive	DARNED	REDI	repetitive	22	0.136	18	0.389	10	0	18	0	9	0	12	0	26	0	16	0	25	0	26	0	16	0	7	0
	1	63117284	A	G	ncRNA_intronic	Ino80dos	RADAR	repetitive	DARNED	REDI	repetitive	19	0	23	0	17	0.176	20	0	9	0	8	0	18	0	25	0	16	0	33	0	21	0	12	0
	1	63172481	T	C	intronic	Ndufs1	.	.	.	REDI	repetitive	3	0.333	4	0	5	0	5	0.4	6	0	6	0	13	0	7	0	24	0	11	0	3	0	5	0
	1	65119389	T	C	intronic	D630023F18Rik	.	.	.	REDI	repetitive	N/A	N/A	3	1	3	0	1	0	N/A	N/A	N/A	N/A	1	0	N/A	N/A	4	0	N/A	N/A	1	0	N/A	N/A
	1	66672183	A	G	intronic	Unc80	RADAR	non-repetitive	DARNED	REDI	non-repetitive	N/A	N/A	9	0.333	3	0	4	0	3	0	3	0	N/A	N/A	N/A	N/A	N/A	N/A	N/A	N/A	N/A	N/A	1	0
	1	66733658	T	C	intronic	Kansl1l	.	.	.	REDI	repetitive	9	0	14	0.143	10	0	2	0	9	0	14	0	33	0	37	0	30	0	76	0	30	0	22	0
	1	68525225	T	C	intronic	Erbb4	.	.	.	REDI	repetitive	2	0	5	0.4	2	0	3	0	N/A	N/A	3	0	N/A	N/A	N/A	N/A	N/A	N/A	N/A	N/A	N/A	N/A	1	0
	1	68525268	T	C	intronic	Erbb4	.	.	.	REDI	repetitive	2	0	4	0.5	1	0	4	0	N/A	N/A	2	0	N/A	N/A	N/A	N/A	N/A	N/A	N/A	N/A	N/A	N/A	N/A	N/A
	1	68541113	T	C	intronic	Erbb4	.	.	.	REDI	repetitive	6	0.333	1	0	N/A	N/A	N/A	N/A	3	0	1	0	N/A	N/A	N/A	N/A	N/A	N/A	N/A	N/A	N/A	N/A	2	0
	1	68735123	T	C	intronic	Erbb4	.	.	.	REDI	repetitive	4	0	7	0.286	5	0	4	0	9	0	11	0	N/A	N/A	N/A	N/A	1	0	N/A	N/A	1	0	N/A	N/A
	1	68735194	T	C	intronic	Erbb4	.	.	.	REDI	repetitive	3	0.667	4	0.75	6	0	6	0	12	0	14	0	N/A	N/A	N/A	N/A	N/A	N/A	N/A	N/A	N/A	N/A	N/A	N/A
	1	68735196	T	C	intronic	Erbb4	.	.	.	REDI	repetitive	3	0.667	4	0.75	6	0	6	0	12	0	14	0	N/A	N/A	N/A	N/A	N/A	N/A	N/A	N/A	N/A	N/A	N/A	N/A
	1	68735871	T	C	intronic	Erbb4	.	.	.	REDI	repetitive	8	0.25	2	0	4	0	8	0	13	0	6	0	N/A	N/A	N/A	N/A	N/A	N/A	N/A	N/A	N/A	N/A	1	0
	1	68815647	T	C	intronic	Erbb4	.	.	.	REDI	repetitive	1	0	1	0	2	1	3	0.667	3	0	6	0	N/A	N/A	N/A	N/A	N/A	N/A	N/A	N/A	N/A	N/A	N/A	N/A
	1	68878154	T	C	intronic	Erbb4	.	.	.	REDI	repetitive	4	0.5	7	0	4	0	4	0	4	0	4	0	N/A	N/A	N/A	N/A	N/A	N/A	N/A	N/A	1	0	1	0
	1	68950292	T	C	intronic	Erbb4	.	.	.	REDI	non-repetitive	4	0	9	0.667	12	0	3	0	11	0	5	0	N/A	N/A	N/A	N/A	N/A	N/A	N/A	N/A	N/A	N/A	N/A	N/A
	1	68950293	T	C	intronic	Erbb4	.	.	.	REDI	non-repetitive	4	0	9	0.444	12	0	3	0	11	0	5	0	N/A	N/A	N/A	N/A	N/A	N/A	N/A	N/A	N/A	N/A	N/A	N/A
	1	68950394	T	C	intronic	Erbb4	RADAR	non-repetitive	DARNED	REDI	non-repetitive	6	0	4	0.25	9	0	1	0	6	0	13	0	N/A	N/A	N/A	N/A	N/A	N/A	N/A	N/A	N/A	N/A	N/A	N/A
	1	68980159	T	C	intronic	Erbb4	.	.	.	REDI	repetitive	12	0.167	9	0	17	0	11	0	12	0	13	0	N/A	N/A	N/A	N/A	N/A	N/A	N/A	N/A	N/A	N/A	N/A	N/A
	1	69009246	T	C	intronic	Erbb4	.	.	.	REDI	repetitive	2	0	5	0	5	0.4	4	0	4	0	2	0	N/A	N/A	N/A	N/A	N/A	N/A	N/A	N/A	1	0	2	0
	1	69037326	T	C	intronic	Erbb4	.	.	.	REDI	repetitive	2	0	5	0.4	7	0	N/A	N/A	1	0	3	0	N/A	N/A	N/A	N/A	N/A	N/A	N/A	N/A	N/A	N/A	N/A	N/A
	1	69038432	T	C	intronic	Erbb4	.	.	.	REDI	repetitive	5	0.4	6	0.333	8	0.25	2	0	8	0	5	0	N/A	N/A	N/A	N/A	N/A	N/A	N/A	N/A	N/A	N/A	N/A	N/A
	1	69038461	T	C	intronic	Erbb4	.	.	.	REDI	repetitive	6	0	4	0	7	0.429	3	0	9	0	4	0	N/A	N/A	N/A	N/A	N/A	N/A	N/A	N/A	N/A	N/A	N/A	N/A
	1	69038518	T	C	intronic	Erbb4	.	.	.	REDI	repetitive	12	0.167	6	0	8	0	6	0	13	0	7	0	N/A	N/A	N/A	N/A	N/A	N/A	N/A	N/A	N/A	N/A	1	0
	1	72266599	A	G	intronic	Pecr	.	.	.	REDI	repetitive	5	0.4	6	0.333	15	0	4	0	5	0	5	0	1	0	N/A	N/A	N/A	N/A	2	0	1	0	1	0
	1	72266600	A	G	intronic	Pecr	.	.	.	REDI	repetitive	5	0.8	6	0.333	15	0	4	0	5	0	5	0	1	0	N/A	N/A	N/A	N/A	2	0	1	0	1	0
	1	72266601	A	G	intronic	Pecr	.	.	.	REDI	repetitive	5	0.8	6	0.333	16	0	4	0	5	0	5	0	1	0	N/A	N/A	N/A	N/A	2	0	1	0	1	0
	1	72294661	A	G	intronic	Tmem169	.	.	.	REDI	repetitive	7	0.286	1	0	3	0	1	0	3	0	1	0	N/A	N/A	2	0	N/A	N/A	N/A	N/A	1	0	N/A	N/A
	1	72294668	A	G	intronic	Tmem169	.	.	.	REDI	repetitive	7	0.286	1	0	3	0	1	0	3	0	N/A	N/A	N/A	N/A	2	0	N/A	N/A	N/A	N/A	1	0	N/A	N/A
	1	72358652	A	G	intronic	Xrcc5	.	.	.	REDI	repetitive	4	0.75	2	0	N/A	N/A	1	0	2	0	1	0	3	0	3	0	2	0	2	0	6	0.333	4	0
	1	72626752	A	G	intronic	Smarcal1	.	.	.	REDI	repetitive	6	0.333	5	1	1	0	3	0	N/A	N/A	1	0	3	0	2	0	7	0	N/A	N/A	6	0	3	0
	1	74252877	A	G	intronic	Arpc2	.	.	.	REDI	repetitive	6	0.667	6	0	6	0	13	0	7	0	8	0	12	0	8	0	14	0	14	0	13	0	3	0
	1	74261747	A	G	intronic	Arpc2	.	.	.	REDI	repetitive	7	0.286	2	0	2	0	2	0	7	0	10	0	9	0	6	0	12	0	14	0	11	0	7	0
	1	74261754	A	G	intronic	Arpc2	.	.	.	REDI	repetitive	6	0.333	1	0	2	0	2	0	7	0	10	0	9	0	6	0	9	0	14	0	9	0	7	0
	1	74441147	T	C	intronic	Usp37	.	.	.	REDI	repetitive	2	0	3	0.667	5	0.4	N/A	N/A	N/A	N/A	N/A	N/A	7	0	2	0	6	0	8	0	2	0	1	0
	1	74474337	T	C	intronic	Usp37	.	.	.	REDI	repetitive	6	0.333	1	0	2	0	4	0.25	6	0	3	0	4	0	3	0	6	0	6	0	6	0	3	0
	1	74580499	T	C	intronic	Zfp142	RADAR	repetitive	DARNED	REDI	repetitive	7	0.429	5	0	7	0	1	0	N/A	N/A	1	0	11	0	4	0	7	0	4	0	2	0	2	0
	1	74581979	T	C	intronic	Zfp142	.	.	.	REDI	repetitive	4	0.5	N/A	N/A	2	0	3	0	3	0	1	0	2	0	5	0	3	0	7	0	5	0	3	0
	1	74584186	T	C	intronic	Zfp142	.	.	.	REDI	repetitive	1	0	1	0	6	0	6	0	6	0	6	0	9	0.222	7	0	6	0	10	0	2	0	7	0
	1	74675108	A	G	intronic	Ttll4	.	.	.	REDI	repetitive	6	0	7	0.571	2	0	1	0	1	0	N/A	N/A	6	0	9	0	2	0	6	0	3	0	1	0
	1	74676888	A	G	intronic	Ttll4	.	.	.	REDI	repetitive	N/A	N/A	1	1	2	0	1	0	2	0	2	0	2	0	4	0	4	0	11	0	3	0	3	0
	1	75187133	T	C	UTR5	Atg9a	.	.	.	REDI	repetitive	9	0.556	10	0.3	7	0	6	0	8	0	13	0	20	0	6	0	20	0	22	0	9	0	14	0
	1	75422016	A	G	exonic	Speg	.	.	.	REDI	non-repetitive	6	0.333	2	1	3	0	5	0	4	0	3	0	1	0	N/A	N/A	1	0	N/A	N/A	1	0	N/A	N/A
	1	75422064	A	G	exonic	Speg	RADAR	non-repetitive	DARNED	REDI	non-repetitive	6	0.833	2	1	2	0	1	0	4	0	3	0	1	0	N/A	N/A	N/A	N/A	N/A	N/A	1	0	N/A	N/A
	1	78455321	T	C	intronic	Farsb	.	.	.	REDI	non-repetitive	3	0	8	0	8	0.25	5	0.6	3	0	6	0	10	0	8	0	14	0	8	0	5	0	2	0
	1	78455322	T	C	intronic	Farsb	.	.	.	REDI	non-repetitive	3	0.667	8	0	8	0	5	0	3	0	6	0	10	0	8	0	14	0	8	0	5	0	2	0
	1	78455332	T	C	intronic	Farsb	.	.	.	REDI	non-repetitive	3	0.333	6	0.667	7	0	5	0	4	0	4	0	9	0.222	9	0	12	0	5	0	4	0	2	0
	1	78676187	A	G	intronic	Acsl3	.	.	.	REDI	repetitive	1	0	4	0.5	1	0	1	0	2	0	N/A	N/A	5	0	5	0	N/A	N/A	1	0	1	0	1	0
	1	79603831	T	C	intergenic	Scg2;Ap1s3	.	.	.	REDI	repetitive	N/A	N/A	2	1	N/A	N/A	N/A	N/A	N/A	N/A	N/A	N/A	3	0	3	0	4	0	N/A	N/A	2	0	1	0
	1	79701631	T	C	downstream	Wdfy1	RADAR	repetitive	DARNED	REDI	repetitive	6	0.5	14	0.643	3	0	1	0	11	0	11	0	5	0	3	0	2	0	1	0	3	0	N/A	N/A
	1	79794495	T	C	UTR3	Serpine2	.	.	.	REDI	non-repetitive	302	0	239	0	285	0	217	0	484	0	473	0	61	0	45	0	40	0.175	48	0	51	0	42	0
	1	81106773	A	G	intronic	Nyap2	.	.	.	REDI	repetitive	7	0	5	0	4	0	4	0.5	1	0	1	0	N/A	N/A	N/A	N/A	N/A	N/A	N/A	N/A	N/A	N/A	N/A	N/A
	1	81106783	A	G	intronic	Nyap2	.	.	.	REDI	repetitive	6	0	4	0	5	0	3	0.667	1	0	1	0	N/A	N/A	N/A	N/A	N/A	N/A	N/A	N/A	N/A	N/A	N/A	N/A
	1	81106786	A	G	intronic	Nyap2	.	.	.	REDI	repetitive	6	0	4	0	5	0	3	0.667	1	0	1	0	N/A	N/A	N/A	N/A	N/A	N/A	N/A	N/A	N/A	N/A	N/A	N/A
	1	81106796	A	G	intronic	Nyap2	.	.	.	REDI	repetitive	6	0	4	0	5	0	2	0.5	2	0	1	0	N/A	N/A	N/A	N/A	N/A	N/A	N/A	N/A	N/A	N/A	N/A	N/A
	1	81334055	A	G	intergenic	Nyap2;Mir6344	.	.	.	REDI	repetitive	4	0	12	0.167	6	0	5	0	16	0	13	0	N/A	N/A	2	0	N/A	N/A	N/A	N/A	1	0	N/A	N/A
	1	82850796	A	G	intronic	Agfg1	.	.	.	REDI	repetitive	3	0	2	1	2	0	2	0	4	0	1	0	6	0	1	0	2	0	4	0	4	0	1	0
	1	84101963	T	C	intronic	Pid1	.	.	.	REDI	repetitive	3	0.667	N/A	N/A	7	0	1	0	N/A	N/A	3	0	1	0	1	0	N/A	N/A	1	0	N/A	N/A	1	0
	1	84529036	T	C	intronic	Dner	.	.	.	REDI	non-repetitive	2	0	N/A	N/A	1	0	2	1	1	0	2	0	N/A	N/A	N/A	N/A	N/A	N/A	N/A	N/A	N/A	N/A	N/A	N/A
	1	84763723	T	C	intronic	Trip12	.	.	.	REDI	repetitive	7	0.429	5	0.4	N/A	N/A	6	0	11	0	8	0	19	0	9	0	21	0	26	0	19	0	9	0
	1	84775193	T	C	intronic	Trip12	.	.	.	REDI	repetitive	10	0.6	6	0.333	5	0	1	0	9	0	6	0	5	0	10	0	9	0	23	0	12	0	4	0
	1	84775563	T	C	intronic	Trip12	.	.	.	REDI	repetitive	6	0	6	0.333	5	0	2	0	7	0	5	0	12	0	6	0	5	0	21	0	18	0	4	0
	1	84843805	A	G	intronic	Fbxo36	.	.	.	REDI	repetitive	3	0	3	0	1	0	6	0.333	4	0	3	0	4	0	N/A	N/A	2	0	4	0	2	0	2	0
	1	84905252	T	C	intergenic	Fbxo36;Slc16a14	.	.	.	REDI	repetitive	17	0	11	0.182	16	0	15	0	9	0	5	0	N/A	N/A	N/A	N/A	1	0	N/A	N/A	N/A	N/A	N/A	N/A
	1	84911529	T	C	intronic	Slc16a14	.	.	.	REDI	repetitive	7	0	8	0.375	3	0.667	4	0	1	0	1	0	N/A	N/A	N/A	N/A	N/A	N/A	N/A	N/A	N/A	N/A	N/A	N/A
	1	84922753	T	C	intronic	Slc16a14	.	.	.	REDI	repetitive	1	0	7	0.286	N/A	N/A	2	0	3	0	6	0	N/A	N/A	N/A	N/A	N/A	N/A	N/A	N/A	N/A	N/A	1	0
	1	84924171	T	C	intronic	Slc16a14	.	.	.	REDI	repetitive	9	0	5	0.2	N/A	N/A	4	0	3	0	1	0	2	0	N/A	N/A	N/A	N/A	N/A	N/A	2	0	N/A	N/A
	1	84924174	T	C	intronic	Slc16a14	.	.	.	REDI	repetitive	7	0	4	0.25	N/A	N/A	4	0	2	0	1	0	2	0	N/A	N/A	N/A	N/A	N/A	N/A	2	0	N/A	N/A
	1	85690441	A	G	intronic	Sp100	.	.	.	REDI	repetitive	N/A	N/A	N/A	N/A	N/A	N/A	N/A	N/A	N/A	N/A	N/A	N/A	11	0.182	11	0	4	0	16	0	12	0	8	0
	1	86067479	A	G	intronic	Psmd1	.	.	.	REDI	repetitive	3	0.667	N/A	N/A	3	0	N/A	N/A	7	0	1	0	2	0	4	0	N/A	N/A	5	0	2	0	N/A	N/A
	1	86076139	A	G	intronic	Psmd1	.	.	.	REDI	repetitive	5	0.4	1	0	2	0	1	0	3	0	10	0	8	0	5	0	9	0	2	0	4	0	9	0
	1	86126914	A	G	intronic	Psmd1	.	.	.	REDI	repetitive	2	0	2	0	1	0	3	0	2	0	N/A	N/A	5	0	5	0.4	7	0	1	0	6	0	4	0
	1	86171602	A	G	intronic	Armc9	.	.	.	REDI	repetitive	1	0	5	0.4	1	0	6	0	4	0	2	0	1	0	N/A	N/A	N/A	N/A	1	0	1	0	N/A	N/A
	1	86172744	A	G	intronic	Armc9	.	.	.	REDI	repetitive	11	0.182	8	0	9	0	2	0	8	0	7	0	8	0	6	0	3	0	4	0	2	0	5	0
	1	86190194	A	G	intronic	Armc9	.	.	.	REDI	non-repetitive	3	0.667	N/A	N/A	N/A	N/A	1	0	N/A	N/A	N/A	N/A	1	0	N/A	N/A	N/A	N/A	2	0	1	0	1	0
	1	86237481	A	G	intronic	Armc9	.	.	.	REDI	repetitive	2	0	5	0.4	1	0	1	0	2	0	1	0	1	0	N/A	N/A	N/A	N/A	2	0	N/A	N/A	N/A	N/A
	1	86277700	A	G	UTR3	Armc9	RADAR	repetitive	DARNED	REDI	repetitive	6	0.333	9	0.333	5	0	2	0	12	0	7	0	4	0	4	0	N/A	N/A	8	0.25	3	0	2	0
	1	86277720	A	G	UTR3	Armc9	RADAR	repetitive	DARNED	REDI	repetitive	5	0	8	0	5	0	1	0	11	0	6	0	4	0.5	3	0	N/A	N/A	8	0	2	0	1	0
	1	86343787	T	C	downstream	Ncl	.	.	.	REDI	repetitive	20	0	19	0.211	15	0	26	0	16	0	18	0	29	0.276	6	0	27	0	5	0.4	12	0.25	7	0
	1	86343788	T	C	downstream	Ncl	.	.	.	REDI	repetitive	20	0	19	0.421	15	0	25	0	15	0	17	0	28	0.321	6	0	24	0.333	5	0.4	12	0.583	7	0
	1	86343863	T	C	downstream	Ncl	.	.	.	REDI	repetitive	21	0	36	0	15	0.133	30	0.167	19	0	16	0	26	0	13	0	29	0	6	0	23	0	5	0
	1	86345911	T	C	UTR3	Ncl	RADAR	repetitive	DARNED	REDI	repetitive	65	0.231	55	0.291	59	0	62	0.177	65	0	44	0	48	0	16	0	29	0	32	0.25	45	0	39	0
	1	86345930	T	C	UTR3	Ncl	RADAR	repetitive	DARNED	REDI	repetitive	54	0	38	0.237	41	0	48	0	57	0	44	0	44	0	17	0	21	0	28	0.143	40	0	35	0
	1	86347736	T	C	UTR3	Ncl	RADAR	repetitive	DARNED	REDI	repetitive	67	0	51	0	65	0	54	0	57	0	64	0	46	0	32	0	30	0	48	0	43	0	21	0.19
	1	86347737	T	C	UTR3	Ncl	RADAR	repetitive	DARNED	REDI	repetitive	68	0	52	0	68	0	55	0	59	0	63	0	46	0	32	0	32	0	48	0	44	0	21	0.19
	1	86347802	T	C	UTR3	Ncl	.	.	.	REDI	repetitive	89	0.281	77	0.169	85	0	79	0	80	0	69	0	69	0.174	40	0.25	56	0.161	65	0.169	46	0.174	29	0.172
	1	86348806	T	C	UTR3	Ncl	RADAR	repetitive	DARNED	REDI	repetitive	35	0.257	40	0.3	52	0	44	0	29	0	46	0	37	0	21	0	17	0.235	32	0	25	0	12	0
	1	86354424	T	C	intronic	Ncl	.	.	.	REDI	repetitive	4	0.75	7	0.571	16	0	7	0	23	0	22	0	41	0	42	0	35	0	49	0	55	0	38	0
	1	86354467	T	C	intronic	Ncl	.	.	.	REDI	repetitive	7	0.429	5	0.4	11	0	4	0	24	0	15	0	26	0	27	0.185	21	0	44	0	42	0	37	0
	1	86354747	T	C	intronic	Ncl	.	.	.	REDI	repetitive	8	0.25	7	0	12	0	4	0	19	0	31	0	37	0	26	0	41	0	30	0	28	0	42	0
	1	86569000	T	C	intronic	Pde6d	.	.	.	REDI	repetitive	5	0	4	0.5	3	0	5	0	2	0	3	0	2	0	1	0	4	0	2	0	3	0	1	0
	1	86897113	A	G	intronic	Dis3l2	.	.	.	REDI	repetitive	1	0	2	0.5	2	0	2	0	1	0	1	0	3	0	4	0	2	0	4	0	3	0	7	0
	1	86897130	A	G	intronic	Dis3l2	.	.	.	REDI	repetitive	4	0	4	0.5	3	0	2	0	2	0	2	0	7	0	5	0	2	0	8	0	4	0	7	0
	1	87402245	A	G	intronic	Gigyf2	.	.	.	REDI	repetitive	N/A	N/A	2	0	N/A	N/A	3	0.667	4	0	3	0	9	0	6	0	8	0	9	0	6	0	5	0
	1	87892380	A	G	intronic	Dgkd	.	.	.	REDI	non-repetitive	7	0.286	1	0	1	0	N/A	N/A	2	0	4	0	69	0	28	0	68	0	70	0	30	0	29	0
	1	87892418	A	G	intronic	Dgkd	.	.	.	REDI	non-repetitive	6	0.5	1	0	1	0	N/A	N/A	3	0	3	0	76	0	25	0	76	0	59	0	25	0	29	0
	1	88272158	T	C	intronic	A730008H23Rik;Hjurp	RADAR	repetitive	.	REDI	repetitive	31	0.161	29	0	28	0	19	0	29	0	24	0	65	0	64	0	73	0	82	0	55	0	59	0
	1	89803809	A	G	intronic	Agap1	.	.	.	REDI	repetitive	2	0	1	0	5	0	6	0.5	1	0	3	0	1	0	2	0	1	0	2	0	4	0	N/A	N/A
	1	89803880	A	G	intronic	Agap1	.	.	.	REDI	repetitive	2	0	3	0	8	0	4	0	1	0	2	0	1	0	1	0	N/A	N/A	2	1	2	0	N/A	N/A
	1	89803905	A	G	intronic	Agap1	.	.	.	REDI	repetitive	4	0	3	0	8	0	5	0	1	0	1	0	2	0	1	0	N/A	N/A	2	1	2	0	N/A	N/A
	1	89806319	A	G	intronic	Agap1	.	.	.	REDI	repetitive	2	0	4	0.75	N/A	N/A	N/A	N/A	1	0	N/A	N/A	2	0	1	0	N/A	N/A	N/A	N/A	N/A	N/A	N/A	N/A
	1	91076659	A	G	intronic	Lrrfip1	.	.	.	REDI	non-repetitive	5	0.8	6	0.667	4	0	N/A	N/A	5	0	2	0	8	0	5	0	6	0	9	0	N/A	N/A	6	0
	1	91391600	T	C	intronic	Ilkap	.	.	.	REDI	repetitive	7	0.286	10	0.2	4	0	7	0	11	0	8	0	24	0	8	0	15	0	22	0	24	0	5	0
	1	93088648	T	C	intronic	Kif1a	.	.	.	REDI	non-repetitive	2	0	3	0	6	0.5	2	0	1	0	3	0	N/A	N/A	N/A	N/A	N/A	N/A	N/A	N/A	N/A	N/A	1	0
	1	93088653	T	C	intronic	Kif1a	.	.	.	REDI	non-repetitive	1	1	3	0	6	0	3	0	1	0	3	0	N/A	N/A	N/A	N/A	N/A	N/A	N/A	N/A	N/A	N/A	1	0
	1	93088667	T	C	intronic	Kif1a	.	.	.	REDI	non-repetitive	2	0	3	0.333	7	0	3	0	2	0	2	0	N/A	N/A	N/A	N/A	N/A	N/A	N/A	N/A	N/A	N/A	N/A	N/A
	1	93371585	A	G	intergenic	Ppp1r7;Ano7	RADAR	repetitive	DARNED	REDI	repetitive	24	0.167	20	0	9	0	17	0	12	0	19	0	3	0	1	0	4	0	5	0	5	0	2	0
	1	93371629	A	G	intergenic	Ppp1r7;Ano7	RADAR	repetitive	DARNED	REDI	repetitive	27	0.259	22	0.409	13	0	20	0	14	0	14	0	3	0	N/A	N/A	2	0	2	0	4	0	2	0
	1	93371645	A	G	intergenic	Ppp1r7;Ano7	RADAR	repetitive	DARNED	REDI	repetitive	25	0.48	24	0.625	13	0	20	0	13	0	16	0	2	0	1	0	5	0	2	0	2	0	2	0
	1	93372097	A	G	intergenic	Ppp1r7;Ano7	.	.	.	REDI	repetitive	14	0.357	9	0.444	8	0	17	0	6	0	5	0	3	0	N/A	N/A	4	0	3	0	2	0	2	0
	1	93412157	T	C	intronic	Hdlbp	.	.	.	REDI	repetitive	1	0	5	0	2	1	2	0	3	0	N/A	N/A	9	0	9	0	8	0	10	0	5	0	1	0
	1	93455805	T	C	intronic	Hdlbp	.	.	.	REDI	repetitive	N/A	N/A	1	1	1	0	N/A	N/A	1	0	1	0	N/A	N/A	3	0	1	0	9	0	1	0	1	0
	1	93509088	A	G	UTR3	2020-09-02	.	.	.	REDI	non-repetitive	299	0	224	0	263	0	232	0	293	0	293	0	367	0	297	0.152	371	0	333	0.144	319	0.141	231	0.182
	1	93619908	T	C	intronic	Farp2	.	.	.	REDI	repetitive	4	0	7	0.286	6	0	2	0	4	0	3	0	2	0	4	0.5	N/A	N/A	3	0	3	0	1	0
	1	93695368	A	G	UTR3	Bok	.	.	.	REDI	non-repetitive	303	0	230	0	208	0	160	0	288	0	292	0	34	0.382	22	0.591	20	0.25	30	0.667	24	0.375	14	0.357
	1	93780538	A	G	intronic	Atg4b	.	.	.	REDI	repetitive	5	0.4	7	0	3	0	3	0	4	0	4	0	8	0	2	0	4	0	1	0	6	0	5	0
	1	93797905	T	C	intronic	Dtymk	.	.	.	REDI	repetitive	10	0.2	3	0	8	0	7	0.286	4	0	8	0	17	0	6	0	9	0	19	0	11	0	6	0
	1	97751683	T	C	intronic	Ppip5k2	.	.	.	REDI	repetitive	14	0	16	0.125	11	0	11	0	19	0	15	0	8	0	10	0	7	0	21	0	10	0	12	0
	1	97751684	T	C	intronic	Ppip5k2	.	.	.	REDI	repetitive	14	0	16	0.125	11	0	11	0	18	0	15	0	8	0	10	0	7	0	22	0	10	0	12	0
	1	97751685	T	C	intronic	Ppip5k2	.	.	.	REDI	repetitive	14	0	16	0.125	11	0	11	0	18	0	15	0	8	0	11	0	7	0	22	0	10	0	12	0
	1	100104784	A	G	intronic	Cntnap5b	.	.	.	REDI	repetitive	2	1	1	0	4	0	N/A	N/A	4	0	1	0	N/A	N/A	N/A	N/A	N/A	N/A	N/A	N/A	N/A	N/A	N/A	N/A
	1	100104796	A	G	intronic	Cntnap5b	.	.	.	REDI	repetitive	2	0	1	0	3	0.333	N/A	N/A	3	0	2	0	N/A	N/A	N/A	N/A	N/A	N/A	N/A	N/A	N/A	N/A	N/A	N/A
	1	105683356	A	G	intronic	2310035C23Rik	.	.	.	REDI	repetitive	5	0	9	0	7	0	8	0.25	6	0	10	0	15	0	6	0	12	0	11	0	1	0	11	0
	1	105733429	A	G	intronic	2310035C23Rik	.	.	.	REDI	repetitive	24	0.25	17	0.235	9	0	8	0	11	0	17	0	22	0	28	0	19	0	38	0	12	0	20	0
	1	105736896	A	G	intronic	2310035C23Rik	.	.	.	REDI	repetitive	31	0	26	0	11	0.182	22	0	18	0	29	0	24	0	9	0	24	0	23	0	26	0	20	0
	1	105740002	A	G	intronic	2310035C23Rik	RADAR	repetitive	DARNED	REDI	repetitive	10	0.3	12	0.25	18	0	21	0	28	0	20	0	49	0	18	0	36	0	54	0	54	0	32	0
	1	105740029	A	G	intronic	2310035C23Rik	RADAR	repetitive	DARNED	REDI	repetitive	12	0.25	19	0	19	0	26	0	25	0	20	0	51	0	27	0	41	0	45	0	55	0	31	0
	1	105740043	A	G	intronic	2310035C23Rik	.	.	.	REDI	repetitive	11	0.182	24	0	17	0	25	0	34	0	20	0	61	0	30	0	42	0	48	0	63	0	30	0
	1	105740063	A	G	intronic	2310035C23Rik	RADAR	repetitive	DARNED	REDI	repetitive	12	0	24	0	18	0	19	0.211	29	0	18	0	52	0	29	0	47	0	39	0	58	0	25	0
	1	111764438	T	C	intergenic	Cdh19;Dsel	.	.	.	REDI	repetitive	3	0.667	N/A	N/A	3	0	N/A	N/A	N/A	N/A	2	0	N/A	N/A	2	0	N/A	N/A	N/A	N/A	N/A	N/A	N/A	N/A
	1	111840326	T	C	intergenic	Cdh19;Dsel	.	.	.	REDI	repetitive	1	0	3	0	4	0.5	N/A	N/A	3	0	2	0	3	0	1	0	1	0	N/A	N/A	2	0	2	0
	1	111843855	T	C	intergenic	Cdh19;Dsel	.	.	.	REDI	repetitive	5	0.4	2	0	N/A	N/A	5	0	3	0	3	0	1	0	N/A	N/A	2	0	N/A	N/A	N/A	N/A	N/A	N/A
	1	115821413	A	G	intronic	Cntnap5a	.	.	.	REDI	repetitive	N/A	N/A	1	0	N/A	N/A	2	1	2	0	1	0	N/A	N/A	N/A	N/A	N/A	N/A	N/A	N/A	N/A	N/A	1	0
	1	115835878	A	G	intronic	Cntnap5a	.	.	.	REDI	non-repetitive	3	0.667	N/A	N/A	1	0	1	0	1	0	1	0	N/A	N/A	N/A	N/A	N/A	N/A	N/A	N/A	N/A	N/A	N/A	N/A
	1	115837332	A	G	intronic	Cntnap5a	.	.	.	REDI	non-repetitive	N/A	N/A	N/A	N/A	4	0.5	N/A	N/A	2	0	1	0	N/A	N/A	N/A	N/A	N/A	N/A	N/A	N/A	1	0	N/A	N/A
	1	116109015	A	G	intronic	Cntnap5a	.	.	.	REDI	non-repetitive	2	1	N/A	N/A	N/A	N/A	N/A	N/A	N/A	N/A	N/A	N/A	N/A	N/A	N/A	N/A	N/A	N/A	N/A	N/A	N/A	N/A	N/A	N/A
	1	116109051	A	G	intronic	Cntnap5a	.	.	.	REDI	non-repetitive	2	1	N/A	N/A	N/A	N/A	N/A	N/A	N/A	N/A	N/A	N/A	N/A	N/A	N/A	N/A	N/A	N/A	N/A	N/A	N/A	N/A	N/A	N/A
	1	116474191	A	G	intronic	Cntnap5a	.	.	.	REDI	non-repetitive	3	0.667	5	1	1	0	N/A	N/A	1	0	N/A	N/A	N/A	N/A	N/A	N/A	N/A	N/A	N/A	N/A	N/A	N/A	1	0
	1	118302731	T	C	intronic	Tsn	.	.	.	REDI	repetitive	9	0	4	0	12	0	N/A	N/A	12	0	7	0	4	0	11	0.182	6	0	14	0	7	0	9	0
	1	118333741	A	G	UTR3	Nifk	.	.	.	REDI	repetitive	29	0.172	18	0	31	0	10	0	29	0	31	0	35	0	27	0	18	0	25	0	29	0	19	0
	1	118574296	A	G	intronic	Clasp1	.	.	.	REDI	repetitive	4	0	1	0	7	0.286	1	0	8	0	2	0	9	0	6	0	4	0	5	0	4	0	6	0
	1	118574314	A	G	intronic	Clasp1	.	.	.	REDI	repetitive	6	0	1	0	6	0.5	N/A	N/A	9	0	3	0	12	0.167	8	0	5	0	6	0	3	0	7	0
	1	118576168	A	G	intronic	Clasp1	.	.	.	REDI	repetitive	6	0	7	0	7	0.286	3	0	4	0	5	0	11	0	7	0	11	0	19	0	6	0	7	0
	1	119770692	T	C	intronic	Ptpn4	.	.	.	REDI	repetitive	6	0	7	0.286	5	0	9	0	17	0	14	0	20	0	6	0	16	0	20	0	6	0	7	0
	1	119770758	T	C	intronic	Ptpn4	.	.	.	REDI	repetitive	14	0.143	15	0	5	0	10	0	18	0	13	0	12	0	7	0	14	0	14	0	7	0	7	0
	1	120168044	A	G	intronic	3110009E18Rik	.	.	.	REDI	repetitive	2	0	N/A	N/A	N/A	N/A	N/A	N/A	N/A	N/A	N/A	N/A	2	1	2	0	1	0	4	0	1	0	N/A	N/A
	1	120168050	A	G	intronic	3110009E18Rik	.	.	.	REDI	repetitive	2	0	N/A	N/A	N/A	N/A	N/A	N/A	N/A	N/A	N/A	N/A	2	1	2	0	1	0	4	0	1	0	N/A	N/A
	1	121550812	T	C	intergenic	Htr5b;Ddx18	.	.	.	REDI	repetitive	7	0	10	0.2	9	0	3	0	13	0	7	0	N/A	N/A	N/A	N/A	N/A	N/A	N/A	N/A	N/A	N/A	N/A	N/A
	1	123482517	T	C	intronic	Dpp10	.	.	.	REDI	repetitive	2	1	2	0	2	0	1	0	3	0	3	0	N/A	N/A	N/A	N/A	N/A	N/A	N/A	N/A	1	0	1	0
	1	123599865	T	C	intronic	Dpp10	.	.	.	REDI	repetitive	5	0.4	3	0	3	0	1	0	2	0	2	0	N/A	N/A	N/A	N/A	N/A	N/A	N/A	N/A	N/A	N/A	N/A	N/A
	1	124259133	T	C	intergenic	Dpp10;Actr3	.	.	.	REDI	repetitive	1	0	N/A	N/A	N/A	N/A	2	1	3	0	N/A	N/A	N/A	N/A	N/A	N/A	N/A	N/A	N/A	N/A	1	0	N/A	N/A
	1	124571713	T	C	intergenic	Dpp10;Actr3	.	.	.	REDI	repetitive	3	0.667	N/A	N/A	3	0	N/A	N/A	N/A	N/A	3	0	N/A	N/A	N/A	N/A	N/A	N/A	N/A	N/A	N/A	N/A	N/A	N/A
	1	124612442	T	C	intergenic	Dpp10;Actr3	.	.	.	REDI	repetitive	1	0	1	0	3	0	2	1	5	0	3	0	N/A	N/A	N/A	N/A	N/A	N/A	N/A	N/A	2	0	N/A	N/A
	1	124612594	T	C	intergenic	Dpp10;Actr3	.	.	.	REDI	repetitive	2	0	6	0.5	3	0	3	0	3	0	4	0	N/A	N/A	N/A	N/A	N/A	N/A	N/A	N/A	N/A	N/A	N/A	N/A
	1	124627038	T	C	intergenic	Dpp10;Actr3	.	.	.	REDI	repetitive	2	0	3	0	6	0.333	1	0	4	0	2	0	N/A	N/A	N/A	N/A	N/A	N/A	N/A	N/A	N/A	N/A	N/A	N/A
	1	124635942	T	C	intergenic	Dpp10;Actr3	.	.	.	REDI	repetitive	1	0	2	1	N/A	N/A	N/A	N/A	1	0	N/A	N/A	N/A	N/A	N/A	N/A	N/A	N/A	N/A	N/A	N/A	N/A	N/A	N/A
	1	124635943	T	C	intergenic	Dpp10;Actr3	.	.	.	REDI	repetitive	1	0	2	1	N/A	N/A	N/A	N/A	1	0	N/A	N/A	N/A	N/A	N/A	N/A	N/A	N/A	N/A	N/A	N/A	N/A	N/A	N/A
	1	124635949	T	C	intergenic	Dpp10;Actr3	.	.	.	REDI	repetitive	1	0	2	1	N/A	N/A	N/A	N/A	1	0	N/A	N/A	N/A	N/A	N/A	N/A	N/A	N/A	N/A	N/A	N/A	N/A	N/A	N/A
	1	124636019	T	C	intergenic	Dpp10;Actr3	.	.	.	REDI	repetitive	N/A	N/A	4	1	N/A	N/A	N/A	N/A	N/A	N/A	N/A	N/A	N/A	N/A	N/A	N/A	N/A	N/A	N/A	N/A	N/A	N/A	N/A	N/A
	1	124729604	T	C	intergenic	Dpp10;Actr3	.	.	.	REDI	repetitive	3	0.667	N/A	N/A	N/A	N/A	1	0	2	0	7	0	N/A	N/A	N/A	N/A	N/A	N/A	N/A	N/A	N/A	N/A	N/A	N/A
	1	127250621	A	G	intronic	Mgat5	.	.	.	REDI	repetitive	2	0	5	0.4	3	0	3	0	3	0	6	0	15	0	11	0	5	0	32	0	13	0	9	0
	1	127913718	A	G	intronic	Rab3gap1	.	.	.	REDI	repetitive	2	0	4	0.5	4	0	5	0	2	0	4	0	13	0	2	0	N/A	N/A	8	0	13	0	12	0
	1	127913739	A	G	intronic	Rab3gap1	.	.	.	REDI	repetitive	4	0.5	2	0.5	5	0	3	0	3	0	4	0	10	0	3	0	1	0	11	0	14	0	11	0
	1	127921197	A	G	intronic	Rab3gap1	.	.	.	REDI	repetitive	2	0	5	0.4	5	0	6	0	6	0	6	0	8	0	17	0	12	0	16	0	8	0	12	0
	1	127921270	A	G	intronic	Rab3gap1	.	.	.	REDI	repetitive	3	0.667	6	0.333	3	0	10	0	9	0	13	0	16	0	19	0	20	0	20	0	13	0	14	0
	1	127929404	A	G	intronic	Rab3gap1	.	.	.	REDI	repetitive	5	0	5	0	6	0	5	0.4	9	0	6	0	21	0	16	0	9	0	45	0	18	0	15	0
	1	127929414	A	G	intronic	Rab3gap1	.	.	.	REDI	repetitive	5	0	7	0	7	0	6	0.333	8	0	5	0	22	0	17	0	9	0	52	0	20	0	20	0
	1	127933036	A	G	intronic	Rab3gap1	.	.	.	REDI	repetitive	7	0	3	0.667	4	0.75	6	0.5	6	0	8	0	45	0	12	0	35	0	18	0	28	0	15	0
	1	128109770	A	G	intronic	R3hdm1	.	.	.	REDI	repetitive	N/A	N/A	6	0.333	6	0	5	0	2	0	7	0	14	0	2	0	6	0	7	0	7	0	N/A	N/A
	1	128109771	A	G	intronic	R3hdm1	.	.	.	REDI	repetitive	N/A	N/A	6	0.333	6	0	5	0	2	0	7	0	14	0	2	0	6	0	7	0	7	0	N/A	N/A
	1	128111657	A	G	intronic	R3hdm1	.	.	.	REDI	repetitive	4	0	3	0	2	0.5	5	0	4	0	8	0	10	0	13	0.154	11	0	19	0	10	0	3	0
	1	128163671	A	G	intronic	R3hdm1	.	.	.	REDI	repetitive	23	0.174	18	0.222	22	0	17	0	35	0	19	0	33	0	32	0	49	0	60	0	26	0	46	0
	1	128163690	A	G	intronic	R3hdm1	.	.	.	REDI	repetitive	26	0.615	16	0.75	23	0	17	0	37	0	22	0	36	0.306	40	0	57	0	63	0	23	0	51	0
	1	128163691	A	G	intronic	R3hdm1	.	.	.	REDI	repetitive	24	0.292	17	0	23	0	18	0	37	0	21	0	35	0	40	0	57	0	63	0	23	0	51	0
	1	128164633	A	G	intronic	R3hdm1	.	.	.	REDI	repetitive	14	0	10	0.3	6	0	10	0	20	0	10	0	13	0	13	0	16	0	13	0	12	0	16	0
	1	128192189	A	G	intronic	R3hdm1	RADAR	repetitive	DARNED	REDI	repetitive	11	0.273	15	0	8	0	9	0	9	0	12	0	30	0	38	0	21	0	37	0	14	0	15	0
	1	128192215	A	G	intronic	R3hdm1	RADAR	repetitive	DARNED	REDI	repetitive	15	0.133	15	0	9	0	9	0	7	0	12	0	33	0	39	0	30	0	50	0	13	0	20	0
	1	128192222	A	G	intronic	R3hdm1	RADAR	repetitive	DARNED	REDI	repetitive	15	0.133	14	0	7	0	11	0	8	0	12	0	36	0	44	0	33	0	55	0	14	0	21	0
	1	128215219	A	G	intronic	R3hdm1	.	.	.	REDI	repetitive	2	0	2	0	5	0	2	0	2	0	2	0	8	0.25	2	0	2	0	4	0	1	0	1	0
	1	128215225	A	G	intronic	R3hdm1	.	.	.	REDI	repetitive	2	0	2	0	4	0	2	0	2	0	2	0	8	0.25	2	0	2	0	3	0	1	0	1	0
	1	128247083	A	G	intronic	Ubxn4	.	.	.	REDI	repetitive	5	0.4	3	0	1	0	5	0	3	0	1	0	2	0	2	0	1	0	2	0	1	0	1	0
	1	128254952	A	G	intronic	Ubxn4	.	.	.	REDI	repetitive	7	0	10	0	7	0.286	1	0	4	0	7	0	1	0	5	0	9	0	5	0	5	0	6	0
	1	128265682	A	G	intronic	Ubxn4	.	.	.	REDI	repetitive	6	0	6	0	4	0	1	0	5	0	7	0	6	0	9	0	4	0	8	0	4	0	4	0.5
	1	128273311	A	G	intronic	Ubxn4	RADAR	repetitive	DARNED	REDI	repetitive	16	0.312	24	0	13	0	10	0	22	0	22	0	24	0	24	0	25	0	23	0	29	0	10	0
	1	128273904	A	G	intronic	Ubxn4	RADAR	repetitive	DARNED	REDI	repetitive	21	0.19	40	0.225	24	0	9	0.222	29	0	14	0	32	0	27	0	29	0	31	0	23	0	15	0
	1	128273907	A	G	intronic	Ubxn4	RADAR	repetitive	DARNED	REDI	repetitive	18	0	39	0	24	0	9	0.222	28	0	14	0	33	0	27	0	26	0	31	0	23	0	14	0
	1	129965415	A	G	intronic	Thsd7b	.	.	.	REDI	non-repetitive	N/A	N/A	N/A	N/A	N/A	N/A	2	1	N/A	N/A	N/A	N/A	N/A	N/A	N/A	N/A	N/A	N/A	N/A	N/A	N/A	N/A	1	0
	1	131166066	A	G	intronic	Eif2d	.	.	.	REDI	repetitive	3	1	2	0	1	0	2	0	3	0	1	0	3	0	1	0	4	0	6	0	2	0	1	0
	1	131414687	T	C	intronic	Srgap2	.	.	.	REDI	repetitive	4	0.5	2	0	5	0	1	0	1	0	4	0	3	0	1	0	2	0	4	0	N/A	N/A	1	0
	1	131912878	A	G	intronic	Nucks1	.	.	.	REDI	repetitive	2	0	10	0.4	6	0	6	0	10	0	5	0	13	0	4	0	11	0	10	0	9	0	5	0
	1	132438321	A	G	intronic	Dstyk	.	.	.	REDI	repetitive	2	0	5	0	4	0.5	2	0	6	0	4	0	1	0	2	0	1	0	3	0	2	0	N/A	N/A
	1	132438412	A	G	intronic	Dstyk	.	.	.	REDI	repetitive	1	0	3	0.667	2	0	1	0	7	0	5	0	3	0	5	0	N/A	N/A	4	0	3	0	N/A	N/A
	1	132440839	A	G	intronic	Dstyk	.	.	.	REDI	repetitive	3	0	3	0.667	3	0	5	0	1	0	8	0	5	0	3	0	2	0	4	0	2	0	3	0
	1	132571146	T	C	intronic	Nfasc	RADAR	non-repetitive	DARNED	REDI	non-repetitive	9	0	3	0	6	0	5	0.4	1	0	8	0	N/A	N/A	N/A	N/A	N/A	N/A	N/A	N/A	N/A	N/A	2	0
	1	132571167	T	C	intronic	Nfasc	RADAR	non-repetitive	DARNED	REDI	non-repetitive	5	0.4	2	1	5	0	5	0	1	0	8	0	N/A	N/A	N/A	N/A	N/A	N/A	N/A	N/A	N/A	N/A	2	0
	1	132572171	T	C	intronic	Nfasc	.	.	.	REDI	non-repetitive	2	0	2	0	3	0.333	3	0	4	0	5	0	1	0	N/A	N/A	1	0	N/A	N/A	N/A	N/A	N/A	N/A
	1	132895663	A	G	intronic	Lrrn2	RADAR	repetitive	DARNED	REDI	repetitive	5	0.4	5	0	4	0	4	0	4	0	2	0	N/A	N/A	N/A	N/A	N/A	N/A	N/A	N/A	N/A	N/A	N/A	N/A
	1	132896201	A	G	intronic	Lrrn2	.	.	.	REDI	repetitive	6	0.667	2	0	3	0	2	0	1	0	2	0	N/A	N/A	N/A	N/A	N/A	N/A	1	0	N/A	N/A	1	0
	1	132896202	A	G	intronic	Lrrn2	.	.	.	REDI	repetitive	6	0.667	2	0	3	0	2	0	1	0	2	0	N/A	N/A	N/A	N/A	N/A	N/A	1	0	N/A	N/A	1	0
	1	133016964	T	C	intronic	Mdm4	.	.	.	REDI	repetitive	1	0	2	0	1	0	5	0	1	0	3	0	10	0.2	5	0	14	0	6	0	16	0	6	0
	1	133097469	A	G	intronic	Pik3c2b	.	.	.	REDI	repetitive	4	0	7	0	3	0	2	0	1	0	2	0	2	0	2	0	3	0	4	0.5	1	0	N/A	N/A
	1	133137544	A	G	UTR3	Ppp1r15b	RADAR	repetitive	.	REDI	repetitive	143	0	101	0	97	0	105	0	117	0	156	0	116	0.207	167	0.353	83	0	234	0.252	86	0	46	0
	1	133138010	A	G	UTR3	Ppp1r15b	RADAR	repetitive	DARNED	REDI	repetitive	68	0	77	0	89	0	73	0	85	0	96	0	76	0.263	98	0.357	34	0.235	131	0.366	69	0.159	56	0.339
	1	133138018	A	G	UTR3	Ppp1r15b	.	.	.	REDI	repetitive	71	0	70	0	83	0	71	0	81	0	84	0	73	0	93	0	31	0	126	0	68	0	56	0.179
	1	134422163	A	G	intronic	Adipor1	.	.	.	REDI	repetitive	3	0	3	0.667	2	0	N/A	N/A	1	0	4	0	5	0	3	0	6	0	5	0	4	0	1	0
	1	134464997	A	G	intronic	Klhl12	.	.	.	REDI	repetitive	8	0.75	6	0	7	0	5	0	9	0	9	0	10	0.2	4	0	10	0	5	0	3	0	9	0
	1	134465327	A	G	intronic	Klhl12	.	.	.	REDI	repetitive	N/A	N/A	4	0.75	2	0	3	0	6	0	8	0	7	0	2	0	3	0	2	0	6	0	3	0
	1	134484857	A	G	intronic	Klhl12	.	.	.	REDI	repetitive	2	1	3	0	N/A	N/A	N/A	N/A	1	0	4	0	4	0	2	0	2	0	2	0	2	0	1	0
	1	134485137	A	G	intronic	Klhl12	.	.	.	REDI	repetitive	N/A	N/A	3	0.667	1	0	N/A	N/A	1	0	2	0	3	0	1	0	2	0	1	0	4	0	3	0
	1	134491436	A	G	downstream	Klhl12	.	.	.	REDI	repetitive	2	0	6	0.333	2	0	N/A	N/A	2	0	3	0	5	0	1	0	7	0	3	0	2	0	4	0
	1	134572393	A	G	intronic	Kdm5b	.	.	.	REDI	repetitive	5	0.4	1	0	2	0	N/A	N/A	1	0	2	0	2	0	2	0	2	0	5	0	3	0	2	0
	1	134591879	A	G	intronic	Kdm5b	.	.	.	REDI	repetitive	9	0.222	7	0	7	0	9	0	3	0	10	0	12	0	7	0	5	0	11	0	4	0	6	0
	1	134591880	A	G	intronic	Kdm5b	.	.	.	REDI	repetitive	9	0.222	7	0	9	0	9	0	3	0	10	0	12	0	6	0	5	0	11	0	4	0	6	0
	1	134591925	A	G	intronic	Kdm5b	.	.	.	REDI	repetitive	8	0	6	0.333	8	0	11	0	4	0	10	0	6	0	11	0	6	0	16	0	5	0	4	0
	1	134602859	A	G	intronic	Kdm5b	.	.	.	REDI	repetitive	3	0	2	0	4	0	5	0.4	13	0	5	0	5	0	14	0	8	0	9	0	16	0	9	0
	1	134759815	T	C	intergenic	Syt2;Ppp1r12b	.	.	.	REDI	non-repetitive	72	0	69	0	76	0	53	0	60	0	79	0	42	0	21	0	24	0	22	0.455	29	0	11	0.182
	1	134924740	T	C	intronic	Ppp1r12b	.	.	.	REDI	repetitive	N/A	N/A	N/A	N/A	1	0	3	0.667	2	0	3	0	6	0	2	0	10	0	8	0	2	0	4	0
	1	135153604	A	G	intronic	Arl8a	.	.	.	REDI	repetitive	11	0.273	5	0.6	5	0	2	0	6	0	3	0	3	0	4	0	3	0	4	0	1	0	N/A	N/A
	1	135388211	T	C	intronic	Ipo9	.	.	.	REDI	repetitive	4	0.5	N/A	N/A	3	0	5	0	1	0	4	0	1	0	N/A	N/A	14	0	4	0	5	0	6	0
	1	135422063	T	C	intronic	Ipo9	.	.	.	REDI	repetitive	4	0	3	0.667	2	0	1	0	4	0	3	0	13	0	10	0	12	0	9	0	14	0	6	0
	1	135423529	T	C	intronic	Ipo9	.	.	.	REDI	repetitive	6	0	1	0	1	0	4	0	3	0	6	0	3	0	8	0.25	11	0	12	0	7	0	4	0
	1	136308361	T	C	intronic	Camsap2	.	.	.	REDI	repetitive	8	0	7	0.286	7	0	N/A	N/A	6	0	3	0	N/A	N/A	3	0	2	0	6	0	2	0	1	0
	1	136308377	T	C	intronic	Camsap2	.	.	.	REDI	repetitive	7	0	5	0.4	7	0	N/A	N/A	6	0	3	0	N/A	N/A	3	0	2	0	6	0	2	0	N/A	N/A
	1	136310185	T	C	intronic	Camsap2	.	.	.	REDI	repetitive	5	0	6	0	3	0	4	0	5	0	5	0	2	0	5	0.4	1	0	3	0	N/A	N/A	2	0
	1	136321092	T	C	intronic	Camsap2	.	.	.	REDI	repetitive	8	0.625	6	0	4	0	13	0	4	0	5	0	3	0	4	0	5	0	12	0	3	0	2	0
	1	136321095	T	C	intronic	Camsap2	.	.	.	REDI	repetitive	7	0.714	5	0.4	4	0	12	0.25	4	0	5	0	3	0	3	0	5	0	10	0.3	4	0	2	0
	1	139160308	A	G	intronic	Dennd1b	.	.	.	REDI	repetitive	5	0	6	0.333	4	0	4	0	2	0	4	0	15	0	15	0	12	0	20	0	6	0	6	0
	1	140394672	A	G	intronic	Kcnt2	.	.	.	REDI	repetitive	N/A	N/A	2	0	1	0	2	0	1	0	N/A	N/A	N/A	N/A	N/A	N/A	N/A	N/A	2	1	N/A	N/A	1	0
	1	140558168	A	G	intronic	Kcnt2	.	.	.	REDI	repetitive	3	0	3	1	1	0	N/A	N/A	1	0	N/A	N/A	N/A	N/A	N/A	N/A	N/A	N/A	N/A	N/A	N/A	N/A	N/A	N/A
	1	140558184	A	G	intronic	Kcnt2	.	.	.	REDI	repetitive	3	0	2	1	1	0	N/A	N/A	1	0	N/A	N/A	N/A	N/A	N/A	N/A	N/A	N/A	N/A	N/A	N/A	N/A	N/A	N/A
	1	140560015	A	G	intronic	Kcnt2	.	.	.	REDI	repetitive	1	0	1	1	2	0	N/A	N/A	N/A	N/A	2	0	N/A	N/A	N/A	N/A	N/A	N/A	N/A	N/A	N/A	N/A	N/A	N/A
	1	143755371	T	C	UTR3	Trove2	RADAR	repetitive	DARNED	REDI	repetitive	122	0	113	0	128	0	81	0	126	0	149	0	9	0.222	21	0	5	0	15	0	20	0	4	0
	1	143755378	T	C	UTR3	Trove2	RADAR	repetitive	DARNED	REDI	repetitive	105	0.952	100	0.87	126	0.476	77	0.519	125	0.192	152	0.171	8	0.75	20	0.65	5	0	14	0.5	21	0.667	6	0
	1	143755383	T	C	UTR3	Trove2	RADAR	repetitive	DARNED	REDI	repetitive	116	0	109	0	128	0	79	0	128	0	151	0	9	0	22	0.182	6	0	15	0	21	0	6	0
	1	143755824	T	C	UTR3	Trove2	.	.	.	REDI	repetitive	125	0	114	0	96	0	101	0	107	0	132	0	14	0	17	0.235	7	0	30	0	24	0	10	0
	1	146461095	T	C	intergenic	Rgs18;Brinp3	.	.	.	REDI	repetitive	2	1	N/A	N/A	N/A	N/A	2	0	N/A	N/A	N/A	N/A	N/A	N/A	N/A	N/A	N/A	N/A	N/A	N/A	1	0	1	0
	1	146547862	A	G	intronic	Brinp3	.	.	.	REDI	repetitive	7	0.429	10	0	4	0	9	0	3	0	7	0	N/A	N/A	N/A	N/A	N/A	N/A	N/A	N/A	N/A	N/A	N/A	N/A
	1	150383732	T	C	intronic	BC003331	.	.	.	REDI	repetitive	20	0.25	10	0.2	24	0	17	0	31	0	24	0	13	0	14	0	12	0	25	0	17	0	9	0
	1	150383734	T	C	intronic	BC003331	RADAR	repetitive	DARNED	REDI	repetitive	19	0.368	10	0.4	24	0	17	0	32	0	23	0	13	0.154	14	0.143	12	0	25	0	16	0	9	0
	1	150383768	T	C	intronic	BC003331	.	.	.	REDI	repetitive	16	0.188	9	0	19	0	11	0	24	0	17	0	5	0	14	0	12	0	19	0	16	0	12	0
	1	150383769	T	C	intronic	BC003331	.	.	.	REDI	repetitive	15	0.2	8	0.375	18	0.222	10	0.3	24	0	17	0	6	0	14	0	12	0	19	0	16	0	12	0
	1	150383772	T	C	intronic	BC003331	.	.	.	REDI	repetitive	16	0.25	9	0	19	0	12	0	24	0	17	0	6	0	14	0	13	0	19	0	17	0	12	0
	1	150383838	T	C	intronic	BC003331	.	.	.	REDI	repetitive	12	0	12	0.167	8	0	9	0	9	0	10	0	7	0	11	0	10	0	10	0	11	0	15	0
	1	150384142	T	C	intronic	BC003331	.	.	.	REDI	repetitive	16	0.188	22	0.182	17	0	12	0	12	0	15	0	16	0	5	0	17	0	11	0	18	0	11	0
	1	150396942	A	G	intronic	Tpr	.	.	.	REDI	repetitive	10	0	13	0	15	0.133	4	0	9	0	21	0	15	0	26	0	19	0	34	0	35	0	22	0
	1	150396947	A	G	intronic	Tpr	.	.	.	REDI	repetitive	8	0	11	0	15	0.133	4	0	9	0	21	0	13	0	25	0	19	0	32	0	30	0	19	0
	1	151329947	T	C	intergenic	C730036E19Rik;Ivns1abp	.	.	.	REDI	repetitive	N/A	N/A	2	1	N/A	N/A	2	1	N/A	N/A	N/A	N/A	N/A	N/A	N/A	N/A	N/A	N/A	N/A	N/A	N/A	N/A	N/A	N/A
	1	151329965	T	C	intergenic	C730036E19Rik;Ivns1abp	.	.	.	REDI	repetitive	N/A	N/A	2	0	N/A	N/A	2	1	N/A	N/A	N/A	N/A	N/A	N/A	N/A	N/A	N/A	N/A	N/A	N/A	N/A	N/A	N/A	N/A
	1	153701268	A	G	intergenic	Rgs8;C230024C17Rik	.	.	.	REDI	non-repetitive	N/A	N/A	1	0	2	1	N/A	N/A	N/A	N/A	N/A	N/A	N/A	N/A	N/A	N/A	N/A	N/A	N/A	N/A	N/A	N/A	N/A	N/A
	1	155161512	A	G	intronic	Stx6	.	.	.	REDI	repetitive	6	0.333	4	0.5	2	0	6	0	7	0	11	0	39	0	26	0	32	0	36	0	16	0	19	0
	1	155170503	A	G	intronic	Stx6	.	.	.	REDI	repetitive	2	0	5	0	4	0.5	2	0	3	0	4	0	20	0	13	0	21	0	21	0	21	0	13	0
	1	155171700	A	G	intronic	Stx6	.	.	.	REDI	repetitive	5	0	2	0	3	0	N/A	N/A	N/A	N/A	N/A	N/A	17	0.412	12	0.167	21	0	15	0	14	0	9	0
	1	155171742	A	G	intronic	Stx6	.	.	.	REDI	repetitive	3	0	2	0	1	0	N/A	N/A	1	0	1	0	25	0.32	10	0.3	23	0	27	0	19	0	8	0
	1	155407653	T	C	intronic	Xpr1	.	.	.	REDI	repetitive	3	1	N/A	N/A	N/A	N/A	1	0	1	0	N/A	N/A	3	0	4	0	2	0	12	0	N/A	N/A	1	0
	1	155673422	A	G	intronic	Acbd6	.	.	.	REDI	repetitive	N/A	N/A	2	1	2	0	N/A	N/A	4	0	1	0	N/A	N/A	N/A	N/A	2	0	1	0	N/A	N/A	1	0
	1	155882659	T	C	intronic	Cep350	.	.	.	REDI	repetitive	2	1	1	0	3	0	1	0	3	0	N/A	N/A	3	0	8	0	7	0	12	0	4	0	3	0
	1	155968327	T	C	intronic	Cep350	.	.	.	REDI	repetitive	11	0.273	9	0	9	0	5	0	15	0	8	0	12	0	12	0	12	0	16	0	20	0	6	0
	1	156008029	T	C	intronic	Tor1aip1	.	.	.	REDI	repetitive	2	0	3	0.667	N/A	N/A	2	0	2	0	N/A	N/A	12	0	13	0	7	0	13	0	14	0	14	0
	1	156039286	A	G	intronic	Tor1aip2	.	.	.	REDI	repetitive	4	0.5	3	1	2	0	2	0	4	0	4	0	6	0	3	0	6	0	11	0	6	0	15	0
	1	156427612	T	C	downstream	Soat1	RADAR	repetitive	DARNED	REDI	repetitive	19	0.947	19	0.789	22	0.455	14	0.286	16	0.438	19	0.368	27	0.481	20	0.25	10	0.4	46	0.304	18	0.389	10	0.3
	1	156427964	T	C	downstream	Soat1	.	.	.	REDI	repetitive	18	0	11	0.182	14	0	14	0	16	0	13	0.154	26	0	25	0	18	0	54	0	8	0	7	0
	1	156428031	T	C	downstream	Soat1	RADAR	repetitive	DARNED	REDI	repetitive	31	0.935	20	0.85	24	0.417	22	0.227	25	0.28	18	0.667	29	0.448	26	0.154	15	0	69	0	20	0	12	0.25
	1	156429227	T	C	UTR3	Soat1	.	.	.	REDI	repetitive	26	0.154	20	0	22	0	38	0	25	0	20	0	24	0	53	0	24	0	115	0	37	0	25	0
	1	156429238	T	C	UTR3	Soat1	.	.	.	REDI	repetitive	24	0.208	19	0	19	0	33	0	25	0	21	0	26	0	45	0	23	0	112	0	39	0	21	0
	1	156598190	A	G	intronic	Abl2	.	.	.	REDI	repetitive	1	0	2	0	3	0	2	0	5	0	3	0	7	0	8	0	7	0	9	0.222	2	0	2	0
	1	156598206	A	G	intronic	Abl2	.	.	.	REDI	repetitive	1	0	1	0	3	0	2	0	5	0	3	0	10	0	9	0	7	0	9	0.222	3	0	3	0
	1	156600134	A	G	intronic	Abl2	.	.	.	REDI	repetitive	4	0	4	0	4	0	8	0	9	0	9	0	12	0	10	0.3	16	0	22	0	8	0	2	0
	1	156600364	A	G	intronic	Abl2	.	.	.	REDI	repetitive	5	0	9	0.556	4	0	4	0	6	0	4	0	12	0.167	6	0	16	0	20	0	13	0	12	0
	1	157162594	T	C	intronic	Rasal2	.	.	.	REDI	repetitive	7	0	4	0.5	2	0	6	0	2	0	4	0	1	0	N/A	N/A	N/A	N/A	N/A	N/A	2	0	N/A	N/A
	1	157376450	T	C	intronic	Rasal2	.	.	.	REDI	repetitive	5	0	N/A	N/A	2	0	2	1	N/A	N/A	2	0	N/A	N/A	N/A	N/A	1	0	N/A	N/A	1	0	N/A	N/A
	1	158426051	A	G	intronic	Astn1	.	.	.	REDI	repetitive	3	0.333	1	0	1	0	4	0.75	5	0	3	0	N/A	N/A	N/A	N/A	N/A	N/A	N/A	N/A	1	0	N/A	N/A
	1	158592119	A	G	intronic	Astn1	.	.	.	REDI	repetitive	3	0	1	0	8	0.375	7	0.286	4	0	5	0	N/A	N/A	N/A	N/A	N/A	N/A	N/A	N/A	N/A	N/A	N/A	N/A
	1	159313421	A	G	intronic	Rfwd2	.	.	.	REDI	repetitive	1	1	2	0	N/A	N/A	N/A	N/A	1	0	N/A	N/A	4	0	N/A	N/A	6	0	2	0	N/A	N/A	1	0
	1	159787339	A	G	intronic	Tnr	.	.	.	REDI	repetitive	2	0	2	0	3	0	6	0.333	1	0	3	0	5	0	N/A	N/A	1	0	N/A	N/A	1	0	N/A	N/A
	1	160236913	T	C	intronic	Rabgap1l	.	.	.	REDI	repetitive	9	0.333	11	0	5	0	10	0	5	0	N/A	N/A	26	0	13	0	25	0	16	0	23	0	20	0
	1	160237640	T	C	intronic	Rabgap1l	.	.	.	REDI	repetitive	7	0.714	5	1	3	0	12	0.333	14	0	9	0	29	0	12	0	34	0	20	0.15	23	0	22	0
	1	160237673	T	C	intronic	Rabgap1l	.	.	.	REDI	repetitive	6	0.667	4	0.75	3	0	11	0.818	14	0	6	0	27	0	17	0	32	0	18	0	31	0	23	0
	1	160237707	T	C	intronic	Rabgap1l	.	.	.	REDI	repetitive	9	0	3	0	2	0	12	0.5	10	0	8	0	27	0	17	0	28	0	19	0	49	0	24	0
	1	160237720	T	C	intronic	Rabgap1l	.	.	.	REDI	repetitive	8	1	3	0	2	0	11	0.273	9	0	9	0	22	0.273	16	0	24	0	19	0	52	0	22	0
	1	160343215	T	C	intronic	Rabgap1l	.	.	.	REDI	repetitive	4	0	7	0.286	N/A	N/A	2	0	1	0	N/A	N/A	1	0	N/A	N/A	1	0	1	0	N/A	N/A	N/A	N/A
	1	160344558	T	C	intronic	Rabgap1l	.	.	.	REDI	repetitive	1	0	6	0.5	2	0	3	0	2	0	4	0	N/A	N/A	1	0	N/A	N/A	1	0	N/A	N/A	N/A	N/A
	1	161012364	T	C	intergenic	Serpinc1;Zbtb37	.	.	.	REDI	repetitive	31	0	41	0.171	22	0	16	0	24	0	35	0	14	0	22	0	10	0	24	0	15	0	12	0
	1	161015179	T	C	intergenic	Serpinc1;Zbtb37	.	.	.	REDI	repetitive	59	0.169	33	0	49	0	31	0	28	0	34	0	24	0.125	36	0	22	0	59	0	14	0	11	0
	1	161063921	T	C	intronic	Dars2	.	.	.	REDI	repetitive	7	0.286	3	0	4	0	N/A	N/A	N/A	N/A	1	0	3	0	1	0	2	0	1	0	N/A	N/A	1	0
	1	161065757	T	C	intronic	Dars2	.	.	.	REDI	repetitive	4	0	3	0.667	1	0	3	0	2	0	2	0	4	0	3	0	3	0	4	0	1	0	N/A	N/A
	1	161067995	T	C	intronic	Dars2	.	.	.	REDI	repetitive	5	0	3	0.667	2	0	N/A	N/A	N/A	N/A	5	0	N/A	N/A	3	0	4	0	3	0	2	0	1	0
	1	161085502	A	G	intronic	Cenpl	.	.	.	REDI	repetitive	1	0	1	0	N/A	N/A	3	0	5	0	1	0	23	0	11	0	16	0.188	17	0	26	0	5	0
	1	162543399	T	C	intronic	Mettl13	.	.	.	REDI	repetitive	5	0.4	7	0	1	0	4	0	3	0	6	0	N/A	N/A	1	0	3	0	2	0	7	0	3	0
	1	162543408	T	C	intronic	Mettl13	.	.	.	REDI	repetitive	6	0.333	6	0	1	0	5	0	4	0	5	0	N/A	N/A	1	0	3	0	3	0	8	0	4	0
	1	162543413	T	C	intronic	Mettl13	.	.	.	REDI	repetitive	6	1	6	0	1	0	5	0	4	0	5	0	N/A	N/A	1	0	3	0	3	0	8	0	4	0
	1	162584818	A	G	intronic	Vamp4	.	.	.	REDI	repetitive	3	0.667	N/A	N/A	6	0	3	0	7	0	5	0	3	0	5	0	8	0	10	0	6	0	6	0
	1	164283297	A	G	intronic	Ccdc181	.	.	.	REDI	repetitive	1	0	1	1	N/A	N/A	2	0	1	0	1	0	5	0	3	0	2	0	2	0	1	0	4	0
	1	164444957	T	C	intronic	Atp1b1	RADAR	repetitive	DARNED	REDI	repetitive	8	0.375	7	0	5	0	1	0	6	0	6	0	2	0	1	0	4	0	7	0	8	0	3	0
	1	164444958	T	C	intronic	Atp1b1	RADAR	repetitive	DARNED	REDI	repetitive	8	0.625	7	0	5	0	1	0	6	0	6	0	2	0	1	0	4	0	7	0	8	0	3	0
	1	165231213	T	C	intronic	Tiprl	RADAR	repetitive	DARNED	REDI	repetitive	9	0	4	0.5	9	0	2	0	1	0	3	0	8	0	12	0	10	0	20	0	1	0	6	0
	1	165231216	T	C	intronic	Tiprl	RADAR	repetitive	DARNED	REDI	repetitive	7	0.286	4	0.5	8	0	2	0	1	0	3	0	9	0	12	0	10	0	20	0	1	0	6	0
	1	165287540	A	G	intergenic	Tiprl;Gpr161	.	.	.	REDI	repetitive	2	0	4	0.75	1	0	3	0	3	0	2	0	N/A	N/A	N/A	N/A	N/A	N/A	N/A	N/A	N/A	N/A	3	0
	1	165287975	A	G	intergenic	Tiprl;Gpr161	.	.	.	REDI	repetitive	1	0	3	0.667	2	0	4	0	3	0	N/A	N/A	N/A	N/A	N/A	N/A	N/A	N/A	N/A	N/A	N/A	N/A	N/A	N/A
	1	165337234	T	C	intronic	Dcaf6	.	.	.	REDI	repetitive	1	0	N/A	N/A	N/A	N/A	3	0.667	2	0	2	0	3	0	11	0	11	0	6	0	2	0	3	0
	1	165622647	T	C	intronic	Mpzl1	.	.	.	REDI	repetitive	2	0	4	0.5	5	0	1	0	3	0	1	0	1	0	N/A	N/A	1	0	N/A	N/A	N/A	N/A	1	0
	1	165888567	T	C	intronic	Pou2f1	.	.	.	REDI	repetitive	5	0.4	5	0	3	0	N/A	N/A	2	0	3	0	14	0	12	0	21	0	18	0	12	0	16	0
	1	165891100	T	C	intronic	Pou2f1	.	.	.	REDI	repetitive	5	0	5	0.4	1	0	4	0	N/A	N/A	N/A	N/A	4	0	2	0	11	0	6	0	7	0	3	0
	1	167278469	T	C	intronic	Uck2	.	.	.	REDI	repetitive	1	0	N/A	N/A	1	0	1	0	3	0	N/A	N/A	7	0	5	0	2	0	13	0.154	N/A	N/A	1	0
	1	168374656	T	C	intronic	Pbx1	.	.	.	REDI	repetitive	15	0	8	0	5	0	6	0	9	0	4	0	5	0.4	1	0	1	0	N/A	N/A	3	0	1	0
	1	170321073	T	C	intronic	Nos1ap	RADAR	repetitive	DARNED	REDI	repetitive	5	0	2	1	3	0	6	0	5	0	3	0	N/A	N/A	N/A	N/A	N/A	N/A	1	0	1	0	1	0
	1	170493353	T	C	intronic	Nos1ap	.	.	.	REDI	repetitive	N/A	N/A	3	0	N/A	N/A	3	0	2	0	N/A	N/A	4	0.5	1	0	N/A	N/A	1	0	N/A	N/A	2	0
	1	170872521	T	C	intergenic	Atf6;Dusp12	.	.	.	REDI	repetitive	6	0	8	0.375	7	0	1	0	3	0	3	0	3	0	N/A	N/A	2	0	5	0	N/A	N/A	2	0
	1	170884606	T	C	intronic	Dusp12	RADAR	repetitive	DARNED	REDI	repetitive	9	0.222	8	0.75	8	0	4	0	4	0	10	0	8	0	8	0	5	0	7	0	8	0	8	0
	1	171137433	T	C	intronic	Sdhc	.	.	.	REDI	repetitive	7	0	19	0.316	4	0	14	0	10	0	11	0	10	0	6	0	14	0	1	0	39	0	13	0
	1	171413402	A	G	intronic	Usf1	.	.	.	REDI	repetitive	2	0	4	0.5	6	0	5	0	1	0	7	0	6	0.333	7	0	2	0	3	0	5	0	2	0
	1	172131839	A	G	intronic	Pex19	.	.	.	REDI	repetitive	9	0	N/A	N/A	3	0.667	4	0	5	0	3	0	10	0	2	0	19	0	19	0	8	0	6	0
	1	174678986	A	G	intronic	Fmn2	.	.	.	REDI	repetitive	3	0	2	0	4	0.75	2	0	2	0	2	0	N/A	N/A	N/A	N/A	N/A	N/A	N/A	N/A	N/A	N/A	N/A	N/A
	1	176010091	T	C	intronic	Pld5	.	.	.	REDI	repetitive	N/A	N/A	2	1	1	0	N/A	N/A	1	0	N/A	N/A	N/A	N/A	N/A	N/A	N/A	N/A	N/A	N/A	N/A	N/A	N/A	N/A
	1	177183820	T	C	intronic	Akt3	.	.	.	REDI	repetitive	4	0	4	0.5	N/A	N/A	4	0	1	0	N/A	N/A	1	0	1	0	1	0	N/A	N/A	2	0	5	0
	1	177183869	T	C	intronic	Akt3	.	.	.	REDI	repetitive	4	0	5	0.4	1	0	4	0	1	0	N/A	N/A	N/A	N/A	2	0	4	0	N/A	N/A	4	0	4	0
	1	177764726	T	C	intronic	Adss	.	.	.	REDI	repetitive	2	0	4	0	N/A	N/A	5	0	4	0	3	0	9	0	13	0.154	12	0	21	0	10	0	10	0
	1	178193426	A	G	intronic	Desi2	.	.	.	REDI	repetitive	6	0	3	0	4	0.25	8	0	12	0	8	0	11	0	8	0	17	0	19	0	7	0	14	0
	1	178215230	A	G	intronic	Desi2	.	.	.	REDI	repetitive	3	0	N/A	N/A	5	0	3	0	3	0	2	0	7	0.286	8	0	9	0	5	0	12	0	3	0
	1	178216285	A	G	intronic	Desi2	.	.	.	REDI	repetitive	4	0	8	0.25	3	0	6	0	4	0	9	0	29	0	27	0	40	0	31	0	16	0	25	0
	1	178333255	T	C	intronic	Hnrnpu	.	.	.	REDI	repetitive	6	0.333	10	0	12	0	7	0	14	0	13	0	40	0	47	0	27	0	41	0	26	0	30	0
	1	178952664	T	C	intergenic	Kif26b;Smyd3	.	.	.	REDI	non-repetitive	34	0.176	31	0.161	16	0	12	0	11	0	10	0	8	0	2	0	8	0	4	0	2	0	11	0
	1	179488497	T	C	intronic	Smyd3	.	.	.	REDI	repetitive	2	0	N/A	N/A	N/A	N/A	1	0	N/A	N/A	N/A	N/A	7	0	4	0.5	4	0	2	0	N/A	N/A	1	0
	1	179529822	T	C	intronic	Tfb2m	.	.	.	REDI	repetitive	5	0	1	0	4	0	2	0	2	0	4	0	5	0.4	6	0	10	0	7	0	8	0	10	0
	1	179529824	T	C	intronic	Tfb2m	.	.	.	REDI	repetitive	5	0	1	0	3	0	3	0	2	0	4	0	5	0.4	6	0	9	0	7	0	9	0	10	0
	1	179530418	T	C	intronic	Tfb2m	.	.	.	REDI	repetitive	3	0.667	2	1	1	0	2	0	4	0	1	0	6	0	5	0	4	0	7	0	5	0	4	0
	1	179532338	T	C	intronic	Tfb2m	.	.	.	REDI	repetitive	6	0.5	7	0.286	3	0	2	0	5	0	10	0	26	0	8	0	18	0	14	0	17	0	20	0
	1	179766597	T	C	intronic	Ahctf1	RADAR	repetitive	DARNED	REDI	repetitive	9	0.556	15	0.2	5	0	4	0.5	9	0	9	0	15	0	20	0	17	0	37	0	15	0	16	0
	1	179766608	T	C	intronic	Ahctf1	.	.	.	REDI	repetitive	7	0.571	14	0.357	5	0	4	0	8	0	10	0	15	0.267	18	0	17	0	33	0	14	0	15	0
	1	179766609	T	C	intronic	Ahctf1	.	.	.	REDI	repetitive	7	0.571	14	0.357	5	0	4	0.5	8	0	10	0	14	0.286	18	0	17	0	33	0	13	0	15	0
	1	179766614	T	C	intronic	Ahctf1	.	.	.	REDI	repetitive	7	0.571	15	0.2	5	0	4	0	8	0	10	0	14	0	15	0	17	0	29	0	14	0	12	0
	1	179771217	T	C	intronic	Ahctf1	.	.	.	REDI	repetitive	15	0.133	1	0	1	0	11	0	7	0	4	0	9	0	12	0	4	0	14	0	9	0	5	0
	1	179771230	T	C	intronic	Ahctf1	.	.	.	REDI	repetitive	15	0.4	2	0	1	0	10	0	9	0	7	0	13	0	14	0	3	0	17	0	10	0	6	0
	1	180424210	A	G	downstream	Itpkb	.	.	.	REDI	non-repetitive	20	0	22	0	12	0	6	0	14	0.143	20	0	67	0	81	0.136	57	0	92	0	30	0	41	0
	1	180742539	A	G	intronic	Acbd3	.	.	.	REDI	non-repetitive	7	0	1	0	6	0.333	6	0	4	0	5	0	5	0	13	0	8	0	18	0	15	0	7	0
	1	181157467	A	G	intronic	Cnih4	.	.	.	REDI	repetitive	7	0	5	0.2	6	0	2	0	7	0	4	0	7	0	1	0	6	0	3	0	9	0	6	0
	1	181157478	A	G	intronic	Cnih4	.	.	.	REDI	repetitive	6	0	5	0.4	6	0	2	0	7	0	5	0	6	0	1	0	7	0	4	0	6	0	7	0
	1	181207607	T	C	intronic	Wdr26	.	.	.	REDI	repetitive	6	0	10	0	9	0.222	9	0	9	0	6	0	46	0	15	0	22	0	39	0	32	0	23	0
	1	181207643	T	C	intronic	Wdr26	.	.	.	REDI	repetitive	4	0	8	0.375	14	0	7	0	8	0	3	0	36	0	12	0	26	0	36	0	31	0	19	0
	1	182878603	A	G	intronic	Susd4	RADAR	repetitive	DARNED	REDI	repetitive	1	1	3	0.333	1	1	2	0	N/A	N/A	N/A	N/A	N/A	N/A	N/A	N/A	1	0	N/A	N/A	2	0	1	0
	1	182879953	A	G	intronic	Susd4	.	.	.	REDI	repetitive	2	1	2	0	4	0	4	0	1	0	N/A	N/A	2	0	N/A	N/A	3	0	N/A	N/A	4	0	3	0
	1	182879958	A	G	intronic	Susd4	RADAR	repetitive	DARNED	REDI	repetitive	2	1	2	0	4	0	4	0.75	1	0	1	0	2	0	N/A	N/A	3	0	N/A	N/A	4	0	3	0
	1	182879964	A	G	intronic	Susd4	RADAR	repetitive	DARNED	REDI	repetitive	3	0.333	2	0	2	0	5	0	N/A	N/A	1	0	1	0	N/A	N/A	3	0	N/A	N/A	4	0	2	0
	1	182880057	A	G	intronic	Susd4	RADAR	repetitive	DARNED	REDI	repetitive	1	0	2	1	2	0.5	2	0	1	0	1	0	1	0	N/A	N/A	N/A	N/A	N/A	N/A	5	0	1	0
	1	183326255	A	G	UTR3	Mia3	.	.	.	REDI	repetitive	9	0	7	0	10	0	7	0	7	0	4	0	16	0	N/A	N/A	10	0	2	0	6	0.333	7	0
	1	183393917	A	G	intronic	Taf1a	.	.	.	REDI	repetitive	2	1	N/A	N/A	2	0	3	0	7	0	2	0	9	0.222	3	0	15	0	6	0	12	0	10	0
	1	183409775	A	G	UTR3	Taf1a	.	.	.	REDI	repetitive	22	0.182	21	0.286	29	0	24	0	12	0	13	0	30	0	29	0	33	0	41	0	28	0	12	0
	1	183409863	A	G	UTR3	Taf1a	.	.	.	REDI	repetitive	28	0	27	0.259	30	0.2	18	0	19	0	22	0	22	0	20	0	14	0	36	0	22	0	19	0
	1	184904290	T	C	intronic	Mark1	RADAR	repetitive	DARNED	REDI	repetitive	11	0.182	11	0	6	0	5	0	13	0	22	0	1	0	N/A	N/A	5	0	N/A	N/A	2	0	N/A	N/A
	1	185275660	A	G	intronic	Rab3gap2	.	.	.	REDI	repetitive	4	0.5	1	0	N/A	N/A	2	0	1	0	1	0	4	0	1	0	2	0	1	0	2	0	4	0
	1	185313382	T	C	ncRNA_exonic	Mir194-1	.	.	.	REDI	non-repetitive	1	0	3	0.667	3	0	3	0	1	0	2	0	5	0	1	0	5	0	6	0	1	0	1	0
	1	187814077	A	G	intronic	Esrrg	.	.	.	REDI	repetitive	2	1	1	0	N/A	N/A	N/A	N/A	N/A	N/A	N/A	N/A	N/A	N/A	N/A	N/A	N/A	N/A	N/A	N/A	1	0	1	0
	1	187814094	A	G	intronic	Esrrg	.	.	.	REDI	repetitive	2	1	2	0	N/A	N/A	N/A	N/A	N/A	N/A	N/A	N/A	N/A	N/A	N/A	N/A	N/A	N/A	N/A	N/A	1	0	1	0
	1	187911498	A	G	intronic	Esrrg	.	.	.	REDI	repetitive	1	0	2	1	4	0	N/A	N/A	3	0	1	0	N/A	N/A	N/A	N/A	N/A	N/A	N/A	N/A	2	0	N/A	N/A
	1	187911501	A	G	intronic	Esrrg	.	.	.	REDI	repetitive	1	0	2	1	4	0	N/A	N/A	3	0	1	0	N/A	N/A	N/A	N/A	N/A	N/A	N/A	N/A	2	0	N/A	N/A
	1	189335047	T	C	intronic	Kcnk2	.	.	.	REDI	repetitive	5	0.6	2	0	5	0	1	0	1	0	1	0	2	0	N/A	N/A	1	0	N/A	N/A	3	0	3	0
	1	191017129	T	C	intronic	Mfsd7b	RADAR	repetitive	DARNED	REDI	repetitive	16	0.312	13	0.231	7	0	11	0	8	0	8	0	16	0	15	0	16	0	24	0	7	0	7	0
	1	191022971	T	C	intronic	Mfsd7b	.	.	.	REDI	repetitive	5	0	9	0.222	6	0	6	0	N/A	N/A	2	0	7	0	3	0	1	0	7	0	7	0	1	0
	1	191053249	T	C	intronic	Tatdn3	.	.	.	REDI	repetitive	7	0	9	0.222	8	0	5	0	11	0	22	0	9	0	2	0	3	0	11	0	16	0	5	0
	1	191723477	A	G	intronic	Lpgat1	.	.	.	REDI	non-repetitive	3	0.667	1	0	2	0	6	0	1	0	3	0	N/A	N/A	5	0	5	0	12	0	6	0	3	0
	1	191830075	A	G	intronic	Nek2	.	.	.	REDI	repetitive	3	0	5	0	1	0	1	0	2	0	4	0	25	0	7	0.429	15	0	14	0	22	0	14	0
	1	192142417	A	G	ncRNA_intronic	Gm10516	.	.	.	REDI	repetitive	3	1	7	0.714	6	0	2	0	3	0	7	0	2	0	2	0	1	0	N/A	N/A	1	0	N/A	N/A
	1	192142425	A	G	ncRNA_intronic	Gm10516	.	.	.	REDI	repetitive	3	1	6	0.333	6	0	2	0	3	0	7	0	2	0	2	0	1	0	N/A	N/A	1	0	N/A	N/A
	1	192147867	A	G	ncRNA_intronic	Gm10516	.	.	.	REDI	repetitive	3	0.667	2	0	2	0	1	0	2	0	2	0	N/A	N/A	N/A	N/A	N/A	N/A	N/A	N/A	1	0	N/A	N/A
	1	192994322	T	C	intronic	Syt14	.	.	.	REDI	repetitive	8	0.375	7	0	6	0	4	0	3	0	3	0	11	0	4	0	9	0	4	0	5	0	8	0
	1	195093491	T	C	intergenic	Cd46;Cr1l	.	.	.	REDI	repetitive	4	0	5	0.4	1	0	N/A	N/A	1	0	N/A	N/A	6	0	4	0	5	0	6	0	5	0	3	0
	1	195094199	T	C	intergenic	Cd46;Cr1l	.	.	.	REDI	repetitive	2	1	2	0	N/A	N/A	N/A	N/A	3	0	N/A	N/A	11	0	10	0	6	0	10	0	1	0	2	0
	1	195094265	T	C	intergenic	Cd46;Cr1l	.	.	.	REDI	repetitive	4	0	3	0.667	N/A	N/A	N/A	N/A	3	0	N/A	N/A	8	0	8	0	3	0	11	0	2	0	2	0
	1	195094429	T	C	intergenic	Cd46;Cr1l	.	.	.	REDI	repetitive	1	0	2	1	2	0	N/A	N/A	1	0	1	0	8	0	10	0	4	0	12	0	1	0	3	0
	2	3434635	A	G	intronic	Dclre1c	.	.	.	REDI	repetitive	7	0	1	0	7	0.286	4	0	4	0	3	0	12	0	16	0	16	0	25	0	19	0	12	0
	2	3434650	A	G	intronic	Dclre1c	.	.	.	REDI	repetitive	5	0.6	1	0	9	0	4	0	4	0	3	0	10	0	11	0.182	16	0	21	0	22	0	12	0
	2	3460256	A	G	UTR3	Dclre1c	RADAR	repetitive	DARNED	REDI	repetitive	4	0.5	6	0.333	2	0	6	0	3	0	6	0	16	0	14	0	35	0	26	0	12	0	4	0
	2	3776350	A	G	intronic	Fam107b	.	.	.	REDI	non-repetitive	3	0.667	N/A	N/A	2	0	N/A	N/A	1	0	9	0	9	0	20	0	4	0	38	0	16	0	15	0
	2	4063441	A	G	intergenic	Fam107b;1700080N15Rik	.	.	.	REDI	repetitive	6	0	14	0.429	5	0	8	0	3	0	3	0	1	0	N/A	N/A	N/A	N/A	N/A	N/A	2	0	2	0
	2	4095234	A	G	intergenic	Fam107b;1700080N15Rik	.	.	.	REDI	repetitive	5	0	6	0.5	13	0	5	0	6	0	10	0	N/A	N/A	1	0	N/A	N/A	N/A	N/A	N/A	N/A	N/A	N/A
	2	4095371	A	G	intergenic	Fam107b;1700080N15Rik	.	.	.	REDI	repetitive	10	0.3	8	0.25	10	0	6	0	7	0	11	0	N/A	N/A	N/A	N/A	N/A	N/A	N/A	N/A	N/A	N/A	1	0
	2	4095381	A	G	intergenic	Fam107b;1700080N15Rik	.	.	.	REDI	repetitive	10	0.2	8	0	11	0	6	0	6	0	10	0	N/A	N/A	N/A	N/A	N/A	N/A	N/A	N/A	N/A	N/A	1	0
	2	4095400	A	G	intergenic	Fam107b;1700080N15Rik	.	.	.	REDI	repetitive	10	0.2	8	0	12	0	7	0	6	0	9	0	N/A	N/A	N/A	N/A	N/A	N/A	N/A	N/A	N/A	N/A	1	0
	2	4095789	A	G	intergenic	Fam107b;1700080N15Rik	.	.	.	REDI	repetitive	N/A	N/A	4	0.75	5	0	9	0	8	0	5	0	N/A	N/A	N/A	N/A	N/A	N/A	N/A	N/A	N/A	N/A	N/A	N/A
	2	4095839	A	G	intergenic	Fam107b;1700080N15Rik	.	.	.	REDI	repetitive	2	1	3	0	9	0	5	0	8	0	9	0	N/A	N/A	N/A	N/A	N/A	N/A	N/A	N/A	N/A	N/A	N/A	N/A
	2	4095875	A	G	intergenic	Fam107b;1700080N15Rik	.	.	.	REDI	repetitive	2	0	3	0	9	0.333	4	0	6	0	11	0	N/A	N/A	N/A	N/A	N/A	N/A	N/A	N/A	N/A	N/A	N/A	N/A
	2	4095876	A	G	intergenic	Fam107b;1700080N15Rik	.	.	.	REDI	repetitive	3	0.667	3	0	9	0	4	0	6	0	11	0	N/A	N/A	N/A	N/A	N/A	N/A	N/A	N/A	N/A	N/A	N/A	N/A
	2	4104120	A	G	intergenic	Fam107b;1700080N15Rik	.	.	.	REDI	repetitive	8	0	7	0	5	0.4	2	0	2	0	4	0	N/A	N/A	N/A	N/A	N/A	N/A	N/A	N/A	N/A	N/A	1	0
	2	4104128	A	G	intergenic	Fam107b;1700080N15Rik	.	.	.	REDI	repetitive	7	0	7	0	5	0.4	2	0	2	0	5	0	N/A	N/A	N/A	N/A	N/A	N/A	N/A	N/A	N/A	N/A	1	0
	2	4104143	A	G	intergenic	Fam107b;1700080N15Rik	.	.	.	REDI	repetitive	8	0	5	0	5	0.4	4	0	2	0	5	0	N/A	N/A	N/A	N/A	N/A	N/A	N/A	N/A	N/A	N/A	N/A	N/A
	2	4105010	A	G	intergenic	Fam107b;1700080N15Rik	.	.	.	REDI	repetitive	16	0	9	0.333	14	0	4	0	6	0	10	0	N/A	N/A	N/A	N/A	N/A	N/A	N/A	N/A	N/A	N/A	N/A	N/A
	2	4115658	A	G	intergenic	Fam107b;1700080N15Rik	.	.	.	REDI	repetitive	10	0.4	13	0	5	0	11	0	7	0	8	0	N/A	N/A	N/A	N/A	N/A	N/A	N/A	N/A	N/A	N/A	N/A	N/A
	2	4115686	A	G	intergenic	Fam107b;1700080N15Rik	.	.	.	REDI	repetitive	13	0.462	7	0	6	0	10	0	5	0	8	0	N/A	N/A	N/A	N/A	N/A	N/A	N/A	N/A	N/A	N/A	N/A	N/A
	2	4115688	A	G	intergenic	Fam107b;1700080N15Rik	.	.	.	REDI	repetitive	14	0.643	7	0.429	6	0.5	10	0.2	5	0	8	0	N/A	N/A	N/A	N/A	N/A	N/A	N/A	N/A	N/A	N/A	N/A	N/A
	2	4115702	A	G	intergenic	Fam107b;1700080N15Rik	.	.	.	REDI	repetitive	12	0.417	7	0	8	0	10	0	5	0	9	0	N/A	N/A	N/A	N/A	N/A	N/A	N/A	N/A	N/A	N/A	N/A	N/A
	2	4118997	A	G	intergenic	Fam107b;1700080N15Rik	.	.	.	REDI	repetitive	4	0.5	9	0	6	0	4	0	7	0	8	0	N/A	N/A	N/A	N/A	N/A	N/A	N/A	N/A	1	0	N/A	N/A
	2	4119011	A	G	intergenic	Fam107b;1700080N15Rik	.	.	.	REDI	repetitive	5	0	8	0.25	6	0	4	0	8	0	9	0	N/A	N/A	N/A	N/A	N/A	N/A	N/A	N/A	1	0	N/A	N/A
	2	4164750	A	G	intronic	Frmd4a	.	.	.	REDI	non-repetitive	N/A	N/A	1	0	2	0	2	0	2	0	N/A	N/A	N/A	N/A	2	1	N/A	N/A	N/A	N/A	N/A	N/A	N/A	N/A
	2	4186464	A	G	intronic	Frmd4a	.	.	.	REDI	repetitive	10	0.3	11	0	8	0	5	0	9	0	11	0	1	0	1	0	1	0	N/A	N/A	3	0	1	0
	2	4196681	A	G	intronic	Frmd4a	.	.	.	REDI	repetitive	5	0	13	0.154	7	0	5	0	3	0	6	0	N/A	N/A	N/A	N/A	1	0	N/A	N/A	N/A	N/A	2	0
	2	4221855	A	G	intronic	Frmd4a	.	.	.	REDI	non-repetitive	5	0	4	0.5	5	0	1	0	3	0	3	0	1	0	N/A	N/A	2	0	3	0	N/A	N/A	3	0
	2	4582207	A	G	intronic	Frmd4a	.	.	.	REDI	repetitive	8	0.625	4	0	3	0	3	0	9	0	1	0	5	0	2	0	2	0	3	0	7	0	1	0
	2	4582252	A	G	intronic	Frmd4a	.	.	.	REDI	repetitive	4	0	3	0	2	0	3	0	7	0	1	0	4	0	2	1	2	0	2	0	5	0	2	0
	2	5020268	T	C	downstream	Optn	.	.	.	REDI	repetitive	30	0.4	16	0.312	12	0	19	0	40	0	26	0	1	0	1	0	N/A	N/A	1	0	2	0	1	0
	2	5661505	T	C	intronic	Camk1d	.	.	.	REDI	repetitive	3	0.333	1	0	2	0	N/A	N/A	1	0	N/A	N/A	N/A	N/A	9	0	4	0	14	0	5	0	1	0
	2	5886770	T	C	intronic	Sec61a2	RADAR	repetitive	.	REDI	repetitive	6	0	10	0.3	5	0.4	4	0	4	0	10	0	9	0	4	0	12	0	3	0	14	0	10	0
	2	5886827	T	C	intronic	Sec61a2	.	.	.	REDI	repetitive	11	0.545	10	0.2	6	0	5	0	3	0	8	0	11	0	7	0	10	0	3	0	12	0	8	0
	2	6746225	T	C	intronic	Celf2	.	.	.	REDI	repetitive	6	0.5	11	0.364	13	0	8	0	11	0	8	0	4	0	3	0	1	0	2	0	2	0	1	0
	2	6746226	T	C	intronic	Celf2	.	.	.	REDI	repetitive	6	0.5	11	0.182	13	0	8	0	11	0	8	0	4	0	3	0	1	0	2	0	2	0	1	0
	2	6746227	T	C	intronic	Celf2	.	.	.	REDI	repetitive	6	0.5	11	0.636	13	0	8	0	11	0	8	0	4	0	3	0	1	0	2	0	2	0	1	0
	2	6917998	T	C	intronic	Celf2	.	.	.	REDI	repetitive	5	0.4	2	0	4	0	4	0	6	0	9	0	N/A	N/A	N/A	N/A	1	0	N/A	N/A	1	0	N/A	N/A
	2	6918045	T	C	intronic	Celf2	.	.	.	REDI	repetitive	5	0.2	3	0	1	0	1	0	3	0	2	0	N/A	N/A	N/A	N/A	N/A	N/A	N/A	N/A	2	0	N/A	N/A
	2	7171757	T	C	intronic	Celf2	.	.	.	REDI	repetitive	2	0	3	0.667	4	0	1	0	4	0	3	0	N/A	N/A	N/A	N/A	N/A	N/A	N/A	N/A	N/A	N/A	N/A	N/A
	2	7324190	T	C	intronic	Celf2	.	.	.	REDI	non-repetitive	5	0	4	1	4	0	N/A	N/A	1	0	N/A	N/A	N/A	N/A	N/A	N/A	N/A	N/A	N/A	N/A	N/A	N/A	N/A	N/A
	2	7324191	T	C	intronic	Celf2	.	.	.	REDI	non-repetitive	5	0	4	0.5	4	0	N/A	N/A	1	0	N/A	N/A	N/A	N/A	N/A	N/A	N/A	N/A	N/A	N/A	N/A	N/A	N/A	N/A
	2	7324192	T	C	intronic	Celf2	.	.	.	REDI	non-repetitive	5	0	4	0.5	4	0	N/A	N/A	1	0	N/A	N/A	N/A	N/A	N/A	N/A	N/A	N/A	N/A	N/A	1	0	N/A	N/A
	2	7325381	T	C	intronic	Celf2	.	.	.	REDI	repetitive	1	0	1	0	3	0.667	2	0	N/A	N/A	1	0	N/A	N/A	N/A	N/A	N/A	N/A	N/A	N/A	N/A	N/A	N/A	N/A
	2	11787048	A	G	intronic	Ankrd16	.	.	.	REDI	repetitive	10	0	8	0	6	0	5	0	8	0	8	0	10	0	3	0	10	0.2	8	0	17	0	6	0
	2	11787050	A	G	intronic	Ankrd16	.	.	.	REDI	repetitive	10	0	8	0	6	0	5	0	8	0	8	0	11	0	3	0	9	0.222	8	0	17	0	6	0
	2	11789294	A	G	intronic	Ankrd16	RADAR	repetitive	DARNED	REDI	repetitive	8	0	8	0	11	0	6	0.333	9	0	6	0	6	0	3	0	9	0	1	0	18	0	5	0
	2	11789298	A	G	intronic	Ankrd16	RADAR	repetitive	DARNED	REDI	repetitive	8	0	9	0	11	0	6	0.333	9	0	7	0	6	0	3	0	9	0	N/A	N/A	18	0	5	0
	2	13260993	T	C	intronic	Rsu1	.	.	.	REDI	repetitive	6	0.333	2	0	1	0	7	0	1	0	N/A	N/A	2	0	4	0	1	0	5	0	5	0	1	0
	2	14134883	A	G	intronic	Stam	.	.	.	REDI	repetitive	3	0	1	0	1	0	2	0	16	0	12	0	3	0	12	0.167	5	0	47	0	18	0	24	0
	2	14147987	A	G	UTR3	Stam	.	.	.	REDI	repetitive	87	0.161	99	0.172	85	0	88	0	88	0	92	0	20	0	18	0	23	0	32	0	32	0	12	0
	2	14148049	A	G	UTR3	Stam	RADAR	repetitive	DARNED	REDI	repetitive	83	0.265	92	0	96	0	90	0	95	0	98	0	25	0	14	0.143	21	0	30	0	35	0	11	0
	2	14148681	A	G	downstream	Stam	.	.	.	REDI	repetitive	40	0.875	30	0.833	41	0	30	0	47	0	35	0	14	0.286	13	0.462	6	0	13	0.154	10	0.2	8	0
	2	14148682	A	G	downstream	Stam	.	.	.	REDI	repetitive	40	0.825	29	0.793	40	0	30	0	46	0	35	0	14	0.286	13	0.308	6	0	14	0	10	0.2	8	0
	2	14148706	A	G	downstream	Stam	.	.	.	REDI	repetitive	45	0	29	0	37	0.189	27	0.148	57	0	32	0	17	0	13	0	3	0	17	0	7	0	11	0
	2	14148749	A	G	downstream	Stam	RADAR	repetitive	DARNED	REDI	repetitive	37	0.459	27	0.222	29	0.517	20	0.6	54	0	40	0	18	0	7	0	4	0	17	0	6	0	12	0
	2	14148757	A	G	downstream	Stam	RADAR	repetitive	DARNED	REDI	repetitive	36	0.361	28	0.571	27	0.481	23	0.652	58	0	44	0	20	0	7	0	5	0	17	0	6	0	13	0
	2	14886554	A	G	intronic	Cacnb2	.	.	.	REDI	non-repetitive	6	0.333	1	0	2	0	N/A	N/A	3	0	1	0	3	0	N/A	N/A	N/A	N/A	N/A	N/A	N/A	N/A	1	0
	2	14887447	A	G	intronic	Cacnb2	.	.	.	REDI	non-repetitive	1	0	9	0.444	4	0	1	0	7	0	4	0	2	0	N/A	N/A	1	0	N/A	N/A	4	0	1	0
	2	18073417	A	G	intronic	Mllt10	.	.	.	REDI	repetitive	5	0	5	0.4	1	0	2	0	1	0	3	0	9	0	9	0	10	0	11	0	4	0	6	0
	2	18109307	A	G	intronic	Mllt10	.	.	.	REDI	repetitive	5	0.6	1	0	4	0	N/A	N/A	2	0	2	0	7	0	14	0	8	0	8	0	5	0	4	0
	2	18187493	A	G	intronic	Mllt10	.	.	.	REDI	repetitive	N/A	N/A	3	0	2	0	3	0	1	0	1	0	8	0.25	4	0	10	0	7	0	4	0	1	0
	2	18187501	A	G	intronic	Mllt10	.	.	.	REDI	repetitive	N/A	N/A	3	0	2	0	3	0	1	0	1	0	7	0.286	2	1	8	0	7	0	4	0	1	0
	2	18187504	A	G	intronic	Mllt10	.	.	.	REDI	repetitive	N/A	N/A	3	0	2	0	3	0	1	0	1	0	7	0.286	2	1	8	0	7	0	4	0	3	0
	2	18189524	A	G	intronic	Mllt10	.	.	.	REDI	repetitive	4	0	N/A	N/A	1	0	N/A	N/A	3	0	1	0	5	0	6	0.333	4	0	4	0	6	0	4	0
	2	18199205	A	G	intronic	Mllt10	.	.	.	REDI	repetitive	6	0.333	7	0	5	0	2	0	4	0	4	0	18	0	5	0	17	0	16	0	7	0	14	0
	2	18199441	T	C	intronic	Mllt10	.	.	.	REDI	repetitive	5	0.6	3	0	1	0	N/A	N/A	2	0	1	0	10	0	2	0	3	0	5	0	11	0	8	0
	2	18214728	T	C	UTR3	Dnajc1	RADAR	repetitive	DARNED	REDI	repetitive	15	0	15	0.467	24	0	10	0	12	0	15	0	27	0	19	0	18	0	29	0	13	0	7	0
	2	18215355	T	C	UTR3	Dnajc1	.	.	.	REDI	repetitive	11	0	13	0	18	0	14	0	12	0	8	0	25	0	15	0	19	0	19	0	11	0	10	0.2
	2	18215363	T	C	UTR3	Dnajc1	RADAR	repetitive	DARNED	REDI	repetitive	13	0	12	0.25	18	0	14	0	14	0	8	0	28	0	17	0	19	0	21	0	12	0	12	0.167
	2	18381459	T	C	intronic	Dnajc1	.	.	.	REDI	repetitive	5	0.4	2	0	7	0	6	0	5	0	3	0	11	0	20	0	21	0	42	0	6	0	16	0
	2	18382118	T	C	intronic	Dnajc1	.	.	.	REDI	non-repetitive	3	0	7	0.714	2	0	1	0	11	0	6	0	24	0	43	0	20	0	51	0	11	0	8	0
	2	18863546	T	C	intronic	Pip4k2a	.	.	.	REDI	repetitive	N/A	N/A	2	1	2	0	3	0	2	0	5	0	54	0	53	0	52	0	90	0	21	0	28	0
	2	18863601	T	C	intronic	Pip4k2a	.	.	.	REDI	repetitive	4	0.5	N/A	N/A	1	0	N/A	N/A	N/A	N/A	4	0	61	0	57	0	32	0	100	0	25	0	20	0
	2	20344852	A	G	intronic	Etl4	.	.	.	REDI	repetitive	N/A	N/A	N/A	N/A	N/A	N/A	N/A	N/A	N/A	N/A	N/A	N/A	2	1	N/A	N/A	1	0	N/A	N/A	1	0	2	0
	2	21412977	A	G	intronic	Gpr158	.	.	.	REDI	repetitive	2	1	N/A	N/A	2	0	N/A	N/A	1	0	N/A	N/A	N/A	N/A	N/A	N/A	N/A	N/A	N/A	N/A	1	0	N/A	N/A
	2	21429939	A	G	intronic	Gpr158	.	.	.	REDI	non-repetitive	1	0	2	1	2	0	1	0	4	0	1	0	N/A	N/A	N/A	N/A	N/A	N/A	N/A	N/A	1	0	1	0
	2	21457685	A	G	intronic	Gpr158	.	.	.	REDI	repetitive	N/A	N/A	N/A	N/A	5	0.4	N/A	N/A	N/A	N/A	2	0	N/A	N/A	1	0	N/A	N/A	N/A	N/A	N/A	N/A	N/A	N/A
	2	22899326	A	G	intronic	Pdss1	.	.	.	REDI	repetitive	3	0	6	0	7	0	3	0	2	0	4	0	4	0.5	5	0	5	0	4	0	5	0	3	0
	2	22936533	A	G	intronic	Pdss1	.	.	.	REDI	repetitive	18	0.444	11	0.545	1	0	14	0	9	0	12	0	20	0	8	0	15	0	6	0	17	0	11	0
	2	23031433	T	C	intronic	Abi1	.	.	.	REDI	repetitive	2	0	2	0	9	0	N/A	N/A	9	0	7	0	18	0.222	7	0	28	0	25	0	32	0	14	0
	2	23031644	T	C	intronic	Abi1	.	.	.	REDI	repetitive	6	0	5	0	6	0.333	3	0	13	0	8	0	35	0	18	0	35	0	41	0	38	0	42	0
	2	23031645	T	C	intronic	Abi1	.	.	.	REDI	repetitive	6	0	5	0	6	0.333	4	0	13	0	8	0	35	0	18	0	36	0	40	0	38	0	42	0
	2	23032621	T	C	intronic	Abi1	.	.	.	REDI	repetitive	4	0	3	0	13	0	4	0	9	0	10	0	44	0	16	0	44	0	18	0	25	0	15	0.133
	2	23032622	T	C	intronic	Abi1	.	.	.	REDI	repetitive	4	0	3	0	13	0	4	0	9	0	10	0	40	0.175	16	0	44	0	20	0	25	0	15	0.133
	2	23098213	A	G	intronic	Acbd5	.	.	.	REDI	repetitive	4	1	3	0	1	0	6	0	4	0	1	0	17	0	10	0	11	0	6	0	4	0	4	0
	2	23159797	A	G	intronic	Yme1l1	.	.	.	REDI	repetitive	12	0.417	11	0.273	3	0	10	0	27	0	29	0	20	0	9	0	17	0	22	0	19	0	26	0
	2	23567834	T	C	intronic	Spopl	.	.	.	REDI	repetitive	11	0.182	3	0	12	0	4	0	13	0	11	0	24	0	14	0.214	38	0	26	0	26	0	32	0
	2	24612352	T	C	intronic	Cacna1b	.	.	.	REDI	repetitive	6	0.667	1	0	4	0	1	0	4	0	1	0	1	0	N/A	N/A	N/A	N/A	N/A	N/A	2	0	N/A	N/A
	2	24614371	T	C	intronic	Cacna1b	.	.	.	REDI	repetitive	4	0.5	6	0	2	0	7	0.286	6	0	7	0	N/A	N/A	N/A	N/A	N/A	N/A	1	0	N/A	N/A	N/A	N/A
	2	24821081	T	C	intronic	Ehmt1	.	.	.	REDI	repetitive	7	0	2	0	3	0	6	0	8	0	4	0	12	0.167	6	0	5	0	10	0	5	0	4	0
	2	24823965	T	C	intronic	Ehmt1	.	.	.	REDI	repetitive	3	0	1	1	2	0	2	0	1	0	2	0	9	0	N/A	N/A	5	0	8	0	2	0	3	0
	2	24910765	T	C	intronic	Ehmt1	.	.	.	REDI	repetitive	4	0.75	5	0.4	5	0	4	0	8	0	7	0	11	0	4	0	17	0	15	0	3	0	3	0
	2	24915948	T	C	intronic	Ehmt1	.	.	.	REDI	repetitive	11	0.273	4	0	4	0	9	0	3	0	10	0	9	0	2	0	6	0	6	0	10	0	8	0
	2	24923310	T	C	intergenic	Ehmt1;Arrdc1	.	.	.	REDI	repetitive	14	0.357	4	0	6	0	2	0	5	0	10	0	3	0	N/A	N/A	1	0	3	0	3	0	N/A	N/A
	2	24923314	T	C	intergenic	Ehmt1;Arrdc1	.	.	.	REDI	repetitive	15	0.6	3	0.333	6	0	2	1	5	0	10	0	3	0	N/A	N/A	N/A	N/A	3	0	3	0	N/A	N/A
	2	24956984	A	G	intronic	Zmynd19	.	.	.	REDI	repetitive	4	0	4	0.5	4	0	17	0	3	0	5	0	1	0	3	0	5	0	4	0	6	0	5	0
	2	25064372	A	G	intergenic	Nsmf;Entpd8	.	.	.	REDI	repetitive	4	0.5	7	0	3	0	4	0	5	0	4	0	N/A	N/A	N/A	N/A	N/A	N/A	N/A	N/A	N/A	N/A	1	0
	2	25064387	A	G	intergenic	Nsmf;Entpd8	.	.	.	REDI	repetitive	3	0.667	4	0	3	0	4	0	2	0	4	0	N/A	N/A	N/A	N/A	N/A	N/A	N/A	N/A	N/A	N/A	1	0
	2	25299768	T	C	intronic	Grin1	RADAR	repetitive	DARNED	REDI	repetitive	7	0.286	14	0	10	0	11	0	6	0	7	0	N/A	N/A	N/A	N/A	N/A	N/A	N/A	N/A	N/A	N/A	N/A	N/A
	2	25299771	T	C	intronic	Grin1	RADAR	repetitive	DARNED	REDI	repetitive	7	0.286	12	0	8	0	11	0	5	0	8	0	N/A	N/A	N/A	N/A	N/A	N/A	N/A	N/A	N/A	N/A	N/A	N/A
	2	25410734	A	G	intergenic	Npdc1;Fut7	RADAR	repetitive	DARNED	REDI	repetitive	3	0	8	0.25	7	0.571	7	0	4	0	7	0	N/A	N/A	1	0	N/A	N/A	1	0	N/A	N/A	2	0
	2	25516209	T	C	intergenic	Fbxw5;Traf2	.	.	.	REDI	repetitive	6	0	4	0	3	0	4	0	11	0	3	0	12	0	15	0	6	0	6	0.333	12	0	1	0
	2	25516483	T	C	intergenic	Fbxw5;Traf2	.	.	.	REDI	repetitive	6	0	4	0	6	0	5	0	4	0	3	0	14	0	20	0	12	0	29	0.138	6	0	12	0
	2	25516717	T	C	intergenic	Fbxw5;Traf2	.	.	.	REDI	repetitive	N/A	N/A	1	0	N/A	N/A	1	0	N/A	N/A	1	0	3	0	2	0	1	0	5	0.4	5	0	4	0
	2	25517811	T	C	downstream	Traf2	.	.	.	REDI	repetitive	5	0	2	0	5	0	1	0	8	0	3	0	6	0	8	0	4	0	23	0	13	0	7	0.286
	2	25517820	T	C	downstream	Traf2	.	.	.	REDI	repetitive	6	0	2	0	5	0	1	0	8	0	3	0	6	0	8	0	5	0	26	0	12	0	7	0.286
	2	25517823	T	C	downstream	Traf2	.	.	.	REDI	repetitive	7	0	2	0	5	0	1	0	9	0	4	0	5	0	10	0	4	0	27	0	12	0	8	0.25
	2	25517887	T	C	downstream	Traf2	.	.	.	REDI	repetitive	7	0	2	0	6	0	1	0	5	0	5	0	5	0	9	0.222	3	0	27	0.222	12	0	4	0
	2	25529518	T	C	intronic	Traf2	.	.	.	REDI	repetitive	1	0	2	1	N/A	N/A	N/A	N/A	N/A	N/A	2	0	5	0.4	6	0	4	0	16	0	12	0	3	0
	2	25603860	T	C	intronic	Rabl6	RADAR	repetitive	DARNED	REDI	repetitive	6	0	7	0.429	14	0	8	0	5	0	5	0	13	0	5	0	16	0	7	0	7	0	4	0
	2	25606247	T	C	intronic	Rabl6	.	.	.	REDI	repetitive	6	0.5	2	0	3	0	8	0	5	0	5	0	7	0	4	0	17	0	14	0	12	0	6	0
	2	25998394	T	C	UTR3	Ubac1	.	.	.	REDI	repetitive	22	0.182	26	0	31	0	26	0	22	0	17	0	8	0	2	0	1	0	3	0	5	0	2	0
	2	25998409	T	C	UTR3	Ubac1	.	.	.	REDI	repetitive	25	0.16	29	0	34	0	26	0	24	0	15	0	8	0	2	0	1	0	3	0	6	0	2	0
	2	26003016	T	C	intronic	Ubac1	.	.	.	REDI	repetitive	6	0	7	0	5	0	2	0	5	0	1	0	8	0	7	0	2	0	8	0	6	0.333	3	0
	2	26013676	T	C	intronic	Ubac1	.	.	.	REDI	repetitive	3	0	6	0	4	0	7	0.286	4	0	3	0	10	0	14	0	5	0	15	0	2	0	2	0
	2	26014216	T	C	intronic	Ubac1	.	.	.	REDI	repetitive	7	0	9	0.222	7	0	6	0.333	11	0	7	0	7	0	6	0	7	0	16	0	2	0	4	0
	2	26381740	A	G	intergenic	Snapc4;Sdccag3	RADAR	repetitive	DARNED	REDI	repetitive	18	0.278	34	0.441	18	0	25	0	18	0	25	0	4	0	1	0	3	0	4	0	5	0	3	0
	2	26382627	A	G	downstream	Sdccag3	.	.	.	REDI	repetitive	10	0.3	9	0	5	0	9	0	14	0	11	0	2	0	N/A	N/A	2	0	2	0	7	0	2	0
	2	26384534	A	G	intronic	Sdccag3	.	.	.	REDI	repetitive	8	0	5	0	12	0.25	6	0	6	0	15	0	6	0	9	0	11	0	11	0	11	0	9	0
	2	26388302	A	G	intronic	Sdccag3	.	.	.	REDI	repetitive	12	0.167	18	0	13	0	9	0	9	0	21	0	1	0	10	0	8	0	15	0	16	0	2	0
	2	26432167	T	C	intronic	Sec16a	.	.	.	REDI	repetitive	12	0	12	0.25	4	0	12	0.25	3	0	6	0	6	0	5	0	5	0	10	0	9	0	6	0
	2	26432862	T	C	intronic	Sec16a	.	.	.	REDI	repetitive	5	0	5	0	4	0	2	1	1	0	3	0	3	0	4	0	2	0	3	0	8	0	5	0
	2	26432895	T	C	intronic	Sec16a	.	.	.	REDI	repetitive	2	0.5	6	0	6	0	1	0	N/A	N/A	4	0	5	0	2	0	1	0	4	0	6	0	2	0
	2	26432955	T	C	intronic	Sec16a	.	.	.	REDI	repetitive	8	0.625	5	0.4	5	0	5	0	2	0	7	0	5	0	5	0	3	0	8	0	9	0	4	0
	2	26909587	T	C	intronic	Med22	.	.	.	REDI	repetitive	5	0	3	0	5	0	1	0	3	0	5	0	N/A	N/A	4	0.5	3	0	4	0	2	0	1	0
	2	26926451	T	C	intronic	Surf4	.	.	.	REDI	repetitive	3	0	7	0.714	1	0	4	0	5	0	5	0	9	0.556	17	0.529	6	0	18	0	8	0	11	0.273
	2	26963653	T	C	intronic	Rexo4	.	.	.	REDI	repetitive	18	0.278	13	0.231	10	0	20	0	14	0	19	0	30	0	8	0	28	0	15	0	32	0	17	0
	2	27530053	A	G	intronic	Wdr5	RADAR	repetitive	DARNED	REDI	repetitive	5	0.4	8	0.375	4	0	6	0	5	0	2	0	10	0	5	0	5	0	8	0	3	0	7	0
	2	28477536	A	G	intergenic	Mrps2;Gbgt1	.	.	.	REDI	non-repetitive	2	0	N/A	N/A	N/A	N/A	1	0	N/A	N/A	1	0	2	1	N/A	N/A	N/A	N/A	N/A	N/A	N/A	N/A	3	0
	2	28531267	A	G	intronic	Ralgds	.	.	.	REDI	repetitive	4	0	5	0.4	6	0	2	0	3	0	2	0	5	0	N/A	N/A	5	0	1	0	2	0	1	0
	2	29062344	A	G	intronic	Ttf1	.	.	.	REDI	repetitive	5	0.4	2	0	2	1	3	0	3	0	5	0	N/A	N/A	16	0	4	0	20	0	11	0	3	0
	2	29132685	A	G	intronic	Setx	.	.	.	REDI	repetitive	17	0	9	0	4	0	8	0	11	0	15	0	10	0.2	18	0	5	0	22	0	12	0	5	0
	2	29135226	A	G	intronic	Setx	.	.	.	REDI	repetitive	8	0	12	0	4	0.5	4	0	12	0	9	0	15	0	30	0	13	0	45	0	9	0	3	0
	2	29174020	A	G	intronic	Setx	.	.	.	REDI	repetitive	2	0	N/A	N/A	3	0	4	0	2	0	1	0	1	0	13	0.154	2	0	18	0	4	0	N/A	N/A
	2	29176694	A	G	intronic	Setx	RADAR	repetitive	DARNED	REDI	repetitive	3	0	5	0.6	4	0.5	4	0	6	0	1	0	7	0.286	22	0.182	8	0	25	0	3	0	13	0
	2	29709621	A	G	intronic	Rapgef1	.	.	.	REDI	repetitive	2	0	1	1	N/A	N/A	1	0	5	0	2	0	6	0	1	0	6	0	8	0	7	0	8	0
	2	29712995	A	G	intronic	Rapgef1	.	.	.	REDI	repetitive	5	0.6	4	0	5	0	5	0	2	0	1	0	4	0	3	0	8	0	2	0	1	0	7	0
	2	29712996	A	G	intronic	Rapgef1	.	.	.	REDI	repetitive	5	0.6	4	0	5	0	5	0	2	0	1	0	4	0	3	0	8	0	2	0	1	0	7	0
	2	29713025	A	G	intronic	Rapgef1	.	.	.	REDI	repetitive	6	0	6	0	5	0	3	0.333	4	0	1	0	5	0	3	0	4	0	3	0	2	0	10	0
	2	29713042	A	G	intronic	Rapgef1	.	.	.	REDI	repetitive	5	0.4	5	0.4	4	0	4	0.5	5	0	1	0	5	0	2	0	6	0	3	0	2	0	10	0
	2	29717536	A	G	intronic	Rapgef1	.	.	.	REDI	repetitive	5	1	2	0	4	0	3	0	N/A	N/A	6	0	16	0	3	0	8	0	15	0	5	0	4	0
	2	29727278	A	G	intronic	Rapgef1	.	.	.	REDI	repetitive	5	0.4	2	0	3	0	4	0	1	0	2	0	22	0.136	7	0	8	0	22	0	1	0	11	0
	2	29770126	T	C	intergenic	Gm13547;Trub2	RADAR	repetitive	DARNED	REDI	repetitive	12	0	23	0	22	0.227	13	0	19	0	14	0	5	0	N/A	N/A	5	0	3	0	1	0	4	0
	2	29770623	T	C	intergenic	Gm13547;Trub2	.	.	.	REDI	repetitive	16	0.312	12	0.167	19	0	28	0	14	0	23	0	3	0	2	0	1	0	5	0	N/A	N/A	2	0
	2	29774895	T	C	UTR3	Trub2	RADAR	repetitive	DARNED	REDI	repetitive	18	0	15	0	12	0.167	11	0	8	0	16	0	11	0	N/A	N/A	3	0	7	0	5	0	6	0
	2	29896861	A	G	intronic	Odf2	.	.	.	REDI	repetitive	7	0.286	10	0	2	0	7	0	2	0	5	0	6	0	1	0	3	0	3	0	12	0	1	0
	2	29897663	A	G	intronic	Odf2	.	.	.	REDI	repetitive	2	0	10	0.5	3	0	1	0	N/A	N/A	3	0	8	0	1	0	7	0	7	0	2	0	3	0
	2	29897668	A	G	intronic	Odf2	.	.	.	REDI	repetitive	2	0	10	0.3	3	0	1	0	N/A	N/A	3	0	7	0	1	0	7	0	6	0	2	0	3	0
	2	29924471	A	G	intronic	Odf2	.	.	.	REDI	repetitive	28	0	37	0.216	30	0	28	0	27	0	23	0	45	0	13	0	57	0	22	0	42	0	16	0
	2	29925150	A	G	intronic	Odf2	RADAR	repetitive	DARNED	REDI	repetitive	30	0.2	29	0.552	13	0	16	0	18	0	22	0	26	0	6	0	20	0	24	0	26	0	6	0
	2	29925151	A	G	intronic	Odf2	RADAR	repetitive	DARNED	REDI	repetitive	31	0.29	28	0.464	13	0	17	0	19	0	22	0	26	0	6	0	20	0	24	0	26	0	6	0
	2	29925446	A	G	intronic	Odf2	.	.	.	REDI	non-repetitive	42	0.214	46	0.283	22	0	33	0	32	0	42	0	38	0	17	0	35	0	25	0	38	0	12	0
	2	29936954	A	G	intronic	Gle1	.	.	.	REDI	repetitive	3	0	3	0.667	4	0	4	0	4	0	6	0	1	0	1	0	3	0	2	0	3	0	1	0
	2	29937634	A	G	intronic	Gle1	.	.	.	REDI	repetitive	N/A	N/A	N/A	N/A	1	1	N/A	N/A	N/A	N/A	N/A	N/A	N/A	N/A	1	0	N/A	N/A	1	0	1	0	3	0
	2	29945816	A	G	intronic	Gle1	.	.	.	REDI	repetitive	6	0.5	8	0	5	0	1	0	7	0	5	0	7	0	4	0	3	0	7	0	8	0	4	0
	2	29947422	A	G	intronic	Gle1	RADAR	repetitive	DARNED	REDI	repetitive	8	0	5	0.4	3	0	8	0	7	0	10	0	13	0	3	0	14	0	8	0	12	0	6	0
	2	29973584	A	G	intronic	Sptan1	.	.	.	REDI	repetitive	7	0.714	6	0.333	2	0.5	5	0	8	0	7	0	4	0.5	2	0	2	0	4	0	7	0	1	0
	2	29973603	A	G	intronic	Sptan1	.	.	.	REDI	repetitive	12	0	6	0	3	0.667	3	0	9	0	8	0	5	0	2	0	3	0	3	0	5	0	2	0
	2	29979409	A	G	intronic	Sptan1	.	.	.	REDI	repetitive	N/A	N/A	3	0.667	3	0	2	0	5	0	3	0	2	0	5	0	1	0	7	0	1	0	3	0
	2	29986634	A	G	intronic	Sptan1	.	.	.	REDI	repetitive	40	0	37	0.243	26	0	41	0	28	0	38	0	37	0	17	0	27	0	16	0	31	0	20	0
	2	30005730	A	G	intronic	Sptan1	.	.	.	REDI	repetitive	8	0	15	0	5	0.8	6	0	3	0	6	0	7	0	4	0	2	0	5	0	9	0	5	0
	2	30005738	A	G	intronic	Sptan1	.	.	.	REDI	repetitive	6	0	16	0.188	5	0	9	0	4	0	6	0	8	0	4	0	1	0	4	0	9	0	6	0
	2	30011591	A	G	intronic	Sptan1	.	.	.	REDI	repetitive	6	0	5	0.4	4	0	1	0	5	0	5	0	4	0	3	0	2	0	2	0	4	0	1	0
	2	30013010	A	G	intronic	Sptan1	.	.	.	REDI	repetitive	8	0.5	5	0.4	6	0	5	0	2	0	6	0	2	0	5	0	N/A	N/A	2	0	2	0	4	0
	2	30037072	T	C	intronic	Wdr34	.	.	.	REDI	repetitive	3	0.333	2	0	2	0	1	0	2	0	4	0	N/A	N/A	1	0	2	0	1	0	4	0	1	0
	2	30135857	A	G	intronic	Tbc1d13	.	.	.	REDI	repetitive	3	0.667	6	0.5	5	0.4	4	0	6	0	12	0	4	0	7	0	6	0	13	0	16	0	4	0
	2	30135873	A	G	intronic	Tbc1d13	.	.	.	REDI	repetitive	2	0.5	7	0.571	6	0	5	0	6	0	11	0	2	0	9	0	3	0	10	0	15	0	3	0
	2	30136455	A	G	intronic	Tbc1d13	.	.	.	REDI	repetitive	4	0.75	4	1	5	0	6	0	2	0	3	0	2	1	9	0	2	0	11	0	2	0	3	0
	2	30137813	A	G	intronic	Tbc1d13	RADAR	repetitive	DARNED	REDI	repetitive	5	0	4	0	3	0	11	0	2	0	3	0	7	0	5	0.4	3	0	7	0	9	0	1	0
	2	30138589	A	G	intronic	Tbc1d13	.	.	.	REDI	repetitive	3	0	1	0	N/A	N/A	2	1	4	0	2	0	4	0	1	0	4	0	6	0	5	0	2	0
	2	30189195	T	C	intronic	Kyat1	RADAR	repetitive	DARNED	REDI	repetitive	1	0	1	1	N/A	N/A	N/A	N/A	N/A	N/A	1	0	N/A	N/A	1	0	2	0	2	0	N/A	N/A	N/A	N/A
	2	30270888	A	G	intronic	Phyhd1	RADAR	repetitive	DARNED	REDI	repetitive	3	0.667	5	0.6	5	0	3	0	4	0	4	0	N/A	N/A	N/A	N/A	N/A	N/A	3	0	2	0	3	0
	2	30273640	A	G	intronic	Phyhd1	.	.	.	REDI	repetitive	5	0	2	1	5	0	1	0	2	0	5	0	1	0	8	0	2	0	3	0	3	0	1	0
	2	30275595	A	G	intronic	Phyhd1	.	.	.	REDI	repetitive	6	0.5	2	0	1	0	3	0	2	0	1	0	N/A	N/A	1	0	N/A	N/A	N/A	N/A	2	0	N/A	N/A
	2	30275611	A	G	intronic	Phyhd1	.	.	.	REDI	repetitive	5	0.6	2	0	2	0	3	0	3	0	1	0	N/A	N/A	1	0	N/A	N/A	N/A	N/A	2	0	N/A	N/A
	2	30278083	A	G	intronic	Phyhd1	RADAR	non-repetitive	DARNED	REDI	non-repetitive	7	0.429	14	0.429	9	0	4	0	5	0	11	0	3	0	1	0	N/A	N/A	4	0	3	0	2	0
	2	30279124	A	G	intronic	Phyhd1	RADAR	repetitive	DARNED	REDI	repetitive	11	0.273	11	0.364	8	0	6	0	9	0	13	0	4	0	10	0	7	0	2	0	3	0	5	0
	2	30279588	A	G	intronic	Phyhd1	.	.	.	REDI	repetitive	7	0.429	3	0	8	0	4	0	9	0	3	0	2	0	6	0	6	0	5	0	6	0	4	0
	2	30313067	A	G	intronic	Nup188	.	.	.	REDI	repetitive	1	0	2	1	1	0	N/A	N/A	2	0	2	0	8	0	2	0	N/A	N/A	5	0	3	0	N/A	N/A
	2	30314244	A	G	intronic	Nup188	.	.	.	REDI	repetitive	3	0	3	0.667	N/A	N/A	1	0	N/A	N/A	N/A	N/A	2	0	1	0	1	0	1	0	2	0	1	0
	2	30373063	A	G	intronic	Miga2	RADAR	repetitive	DARNED	REDI	repetitive	4	0	2	1	1	0	N/A	N/A	N/A	N/A	1	0	N/A	N/A	3	0.667	2	0	1	0	1	0	N/A	N/A
	2	30432492	A	G	intronic	Ptpa	RADAR	repetitive	DARNED	REDI	repetitive	7	0.286	4	0.5	5	0	12	0	4	0	6	0	12	0	4	0	7	0	11	0	9	0	9	0
	2	30433895	A	G	intronic	Ptpa	.	.	.	REDI	repetitive	5	0	9	0.333	11	0	8	0	8	0	11	0	21	0	9	0	17	0	10	0	10	0	2	0
	2	31001494	A	G	intronic	Usp20	.	.	.	REDI	repetitive	7	0.286	8	0	N/A	N/A	3	0	3	0	1	0	6	0	2	0	1	0	4	0	4	0	4	0
	2	31026924	T	C	UTR3	Fnbp1	.	.	.	REDI	non-repetitive	59	0	37	0	47	0	33	0	56	0	32	0	78	0	47	0.17	87	0	79	0.152	50	0	29	0
	2	31030384	T	C	intronic	Fnbp1	RADAR	repetitive	DARNED	REDI	repetitive	7	0	2	0	N/A	N/A	2	0.5	1	0	4	0	39	0	21	0	28	0	22	0	15	0	7	0
	2	31030932	T	C	intronic	Fnbp1	RADAR	repetitive	DARNED	REDI	repetitive	6	0	2	0	3	0	4	0	7	0	1	0	33	0.333	18	0.389	46	0.196	32	0.281	15	0.2	14	0.143
	2	31030942	T	C	intronic	Fnbp1	.	.	.	REDI	repetitive	4	0	1	0	3	0	3	0	5	0	1	0	33	0	22	0	44	0	29	0	15	0	14	0.143
	2	31030943	T	C	intronic	Fnbp1	RADAR	repetitive	DARNED	REDI	repetitive	4	0	1	0	3	0	3	0	5	0	1	0	31	0.258	21	0.524	43	0.302	29	0.379	15	0.333	14	0.357
	2	31030966	T	C	intronic	Fnbp1	.	.	.	REDI	repetitive	3	0	1	0	2	0	4	0	5	0	1	0	29	0.138	17	0	39	0	28	0.179	13	0	15	0
	2	31031049	T	C	intronic	Fnbp1	.	.	.	REDI	repetitive	5	0	7	0.286	1	0	3	0	2	0	N/A	N/A	44	0	17	0	35	0	22	0	17	0	6	0
	2	31031060	T	C	intronic	Fnbp1	RADAR	repetitive	.	REDI	repetitive	5	0	7	0.571	1	0	1	0	1	0	1	0	43	0	17	0	33	0	19	0	18	0	5	0
	2	31059462	T	C	intronic	Fnbp1	.	.	.	REDI	repetitive	6	0	6	0.5	5	0	1	0	3	0	N/A	N/A	26	0	7	0	22	0	10	0	24	0	7	0
	2	31148803	T	C	intergenic	Fnbp1;D330023K18Rik	RADAR	repetitive	DARNED	REDI	repetitive	5	0.4	3	0	4	0	6	0.333	6	0	3	0	3	0	5	0	1	0	1	0	3	0	N/A	N/A
	2	31180708	A	G	intronic	Gpr107	.	.	.	REDI	repetitive	7	0.286	6	0	N/A	N/A	6	0	9	0	6	0	11	0	6	0	14	0	12	0	6	0	8	0
	2	31181624	A	G	intronic	Gpr107	.	.	.	REDI	repetitive	3	0.667	8	0	3	0	5	0	4	0	5	0	3	0	4	0	8	0	5	0	16	0	4	0
	2	31181667	A	G	intronic	Gpr107	.	.	.	REDI	repetitive	3	0	10	0.4	4	0	11	0	4	0	5	0	7	0	4	0	8	0	6	0	13	0	3	0
	2	31190025	A	G	intronic	Gpr107	.	.	.	REDI	repetitive	13	0.231	6	0.667	15	0	14	0	6	0	8	0	25	0	11	0	35	0	17	0	17	0	20	0
	2	31199689	A	G	intronic	Gpr107	.	.	.	REDI	repetitive	4	0	3	0.667	3	0	7	0	3	0	6	0	7	0	3	0	3	0	4	0	3	0	3	0
	2	31199797	A	G	intronic	Gpr107	.	.	.	REDI	repetitive	8	0	11	0.182	2	0	11	0	3	0	3	0	11	0	5	0	9	0	3	0	7	0	4	0
	2	31200758	A	G	intronic	Gpr107	.	.	.	REDI	repetitive	6	0.333	N/A	N/A	1	0	1	0	4	0	N/A	N/A	2	0	1	0	1	0	3	0	5	0	2	0
	2	31224158	A	G	intergenic	Gpr107;Ncs1	RADAR	repetitive	DARNED	REDI	repetitive	2	1	1	1	6	0	3	0	5	0	2	0	2	0	8	0	2	0	7	0	5	0	4	0
	2	31587946	A	G	intronic	Fubp3	.	.	.	REDI	repetitive	5	0	5	0	1	0	9	0.222	6	0	9	0	2	0	3	0	2	0	2	0	13	0	6	0
	2	31601224	A	G	intronic	Fubp3	.	.	.	REDI	repetitive	2	1	1	0	N/A	N/A	5	0	1	0	1	0	3	0	2	0	3	0	3	0	2	0	2	0
	2	31601296	A	G	intronic	Fubp3	.	.	.	REDI	repetitive	2	0	1	0	N/A	N/A	5	0.4	1	0	N/A	N/A	4	0	3	0	2	0	1	0	1	0	N/A	N/A
	2	31601481	A	G	intronic	Fubp3	.	.	.	REDI	repetitive	3	0.667	6	0	2	0	4	0	2	0	3	0	13	0	8	0	8	0	4	0	3	0	2	0
	2	31615894	A	G	UTR3	Fubp3	RADAR	non-repetitive	DARNED	REDI	non-repetitive	15	0.267	12	0	16	0.25	14	0	24	0.25	18	0	15	0.2	10	0.2	15	0.267	14	0.286	12	0	2	0
	2	31682804	A	G	intergenic	Exosc2;Abl1	.	.	.	REDI	repetitive	3	0	2	0	N/A	N/A	3	0.667	2	0	N/A	N/A	3	0	N/A	N/A	5	0	1	0	N/A	N/A	N/A	N/A
	2	31694099	A	G	intronic	Abl1	.	.	.	REDI	repetitive	N/A	N/A	1	0	1	0	1	0	1	0	N/A	N/A	2	1	2	0	2	0	2	0	1	0	2	0
	2	31764535	A	G	intronic	Abl1	.	.	.	REDI	repetitive	N/A	N/A	N/A	N/A	1	0	6	0	5	0	1	0	10	0	7	0	7	0.286	14	0	2	0	2	0
	2	31998411	A	G	intronic	Nup214	.	.	.	REDI	repetitive	7	0.286	4	0	4	0	2	0	5	0	4	0	15	0	4	0	11	0	7	0	11	0	6	0
	2	31998415	A	G	intronic	Nup214	.	.	.	REDI	repetitive	6	0	5	0.4	4	0	2	0	5	0	3	0	15	0	4	0	10	0	7	0	10	0	5	0
	2	32195612	A	G	intronic	Prrc2b	.	.	.	REDI	repetitive	15	0.133	10	0	20	0	21	0	11	0	6	0	40	0	17	0	36	0	35	0	30	0	23	0
	2	32215702	A	G	intronic	Prrc2b	.	.	.	REDI	non-repetitive	12	0	8	0	12	0.167	5	0	4	0	5	0	20	0	14	0	22	0	16	0	17	0	4	0
	2	32228352	A	G	intronic	Prrc2b	.	.	.	REDI	repetitive	7	0	8	0.25	8	0	3	0	5	0	3	0	12	0	17	0	11	0	13	0	10	0	8	0
	2	32283424	T	C	intronic	Swi5	.	.	.	REDI	repetitive	7	0	4	0.5	5	0	5	0	6	0	5	0	2	0	9	0	7	0	4	0	10	0	5	0
	2	32314123	T	C	intronic	Dnm1	RADAR	repetitive	DARNED	REDI	repetitive	3	0	4	0.5	1	0	3	0	2	0	N/A	N/A	N/A	N/A	N/A	N/A	N/A	N/A	N/A	N/A	1	0	1	0
	2	32338807	T	C	intronic	Dnm1	.	.	.	REDI	repetitive	N/A	N/A	N/A	N/A	2	1	N/A	N/A	N/A	N/A	N/A	N/A	N/A	N/A	N/A	N/A	N/A	N/A	N/A	N/A	N/A	N/A	N/A	N/A
	2	32367884	A	G	intronic	Ciz1	.	.	.	REDI	repetitive	4	1	1	0	N/A	N/A	2	0	N/A	N/A	N/A	N/A	2	0	N/A	N/A	N/A	N/A	N/A	N/A	1	0	3	0
	2	32367889	A	G	intronic	Ciz1	.	.	.	REDI	repetitive	4	0.5	1	0	N/A	N/A	2	0	N/A	N/A	N/A	N/A	2	0	N/A	N/A	N/A	N/A	N/A	N/A	1	0	3	0
	2	32399471	A	G	intronic	Ptges2	.	.	.	REDI	repetitive	4	0	1	1	N/A	N/A	2	0	1	0	2	0	1	0	N/A	N/A	2	0	3	0	1	0	N/A	N/A
	2	32425579	T	C	intronic	Slc25a25	.	.	.	REDI	repetitive	1	0	2	0	4	0.5	N/A	N/A	N/A	N/A	1	0	3	0	1	0	N/A	N/A	6	0	N/A	N/A	3	0
	2	32708634	T	C	intronic	Cdk9	.	.	.	REDI	repetitive	7	0.286	7	0	6	0	6	0	6	0	6	0	7	0	9	0	7	0	13	0	6	0	5	0
	2	32791796	T	C	intronic	Stxbp1	RADAR	repetitive	DARNED	REDI	repetitive	11	0.182	6	0	17	0	3	0	5	0	11	0	9	0	N/A	N/A	2	0	2	0	6	0	2	0
	2	32791808	T	C	intronic	Stxbp1	RADAR	repetitive	DARNED	REDI	repetitive	10	0.4	7	0	17	0	4	0	7	0	12	0	10	0	N/A	N/A	2	0	1	0	6	0	2	0
	2	32791818	T	C	intronic	Stxbp1	.	.	.	REDI	repetitive	8	0.25	7	0	18	0	4	0	7	0	10	0	9	0	N/A	N/A	2	0	1	0	5	0	2	0
	2	32805388	T	C	intronic	Stxbp1	.	.	.	REDI	repetitive	6	0.333	2	0	1	0	1	0	3	0	N/A	N/A	N/A	N/A	2	0	2	0	1	0	1	0	1	0
	2	32813958	T	C	intronic	Stxbp1	.	.	.	REDI	repetitive	8	0	5	0.4	10	0	N/A	N/A	7	0	10	0	2	0	N/A	N/A	1	0	N/A	N/A	N/A	N/A	1	0
	2	32971810	T	C	intergenic	Rpl12;Slc2a8	.	.	.	REDI	repetitive	5	0	9	0	17	0	7	0	3	0	8	0	1	0	3	0	3	0.667	2	0	4	0	1	0
	2	32972295	T	C	downstream	Slc2a8	RADAR	repetitive	DARNED	REDI	repetitive	7	0	12	0.167	9	0	5	0	7	0	8	0	N/A	N/A	N/A	N/A	1	0	3	0	5	0	2	0
	2	32972301	T	C	downstream	Slc2a8	.	.	.	REDI	repetitive	8	0	12	0.167	9	0	5	0	7	0	9	0	N/A	N/A	N/A	N/A	1	0	3	0	5	0	2	0
	2	32972567	T	C	downstream	Slc2a8	RADAR	repetitive	DARNED	REDI	repetitive	6	0.333	4	0	11	0	3	0	2	0	6	0	2	0	N/A	N/A	4	0	3	0	4	0	2	0
	2	32991930	T	C	intronic	Garnl3	.	.	.	REDI	repetitive	3	0	3	0.667	7	0	2	0.5	2	0	1	0	N/A	N/A	N/A	N/A	2	0	N/A	N/A	N/A	N/A	2	0
	2	32998678	T	C	intronic	Garnl3	.	.	.	REDI	repetitive	3	0.667	2	1	6	0	8	0	4	0	1	0	N/A	N/A	N/A	N/A	N/A	N/A	N/A	N/A	N/A	N/A	N/A	N/A
	2	32998679	T	C	intronic	Garnl3	.	.	.	REDI	repetitive	3	0.667	2	1	6	0	8	0	4	0	1	0	N/A	N/A	N/A	N/A	N/A	N/A	N/A	N/A	N/A	N/A	N/A	N/A
	2	33002058	T	C	intronic	Garnl3	RADAR	repetitive	DARNED	REDI	repetitive	5	0	6	0.333	1	1	5	0.4	7	0	2	0	N/A	N/A	N/A	N/A	1	0	N/A	N/A	3	0	1	0
	2	33002062	T	C	intronic	Garnl3	.	.	.	REDI	repetitive	4	0	6	0.333	2	0	5	0	7	0	2	0	N/A	N/A	N/A	N/A	1	0	N/A	N/A	3	0	1	0
	2	33002069	T	C	intronic	Garnl3	RADAR	repetitive	DARNED	REDI	repetitive	2	0	7	0.429	2	0	6	0	7	0	1	0	N/A	N/A	N/A	N/A	1	0	N/A	N/A	3	0	1	0
	2	33002077	T	C	intronic	Garnl3	RADAR	repetitive	DARNED	REDI	repetitive	2	0	7	0.429	2	0	6	0.333	8	0	1	0	N/A	N/A	N/A	N/A	1	0	N/A	N/A	3	0	1	0
	2	33021416	T	C	intronic	Garnl3	RADAR	repetitive	DARNED	REDI	repetitive	8	0.75	3	0	7	0	3	0	N/A	N/A	5	0	N/A	N/A	N/A	N/A	1	0	1	0	N/A	N/A	N/A	N/A
	2	33021432	T	C	intronic	Garnl3	.	.	.	REDI	repetitive	8	0.25	2	0	7	0	N/A	N/A	N/A	N/A	6	0	1	0	N/A	N/A	1	0	1	0	1	0	N/A	N/A
	2	33021442	T	C	intronic	Garnl3	.	.	.	REDI	repetitive	12	0.25	2	0	8	0	1	0	N/A	N/A	5	0	2	0	N/A	N/A	1	0	1	0	1	0	N/A	N/A
	2	33021446	T	C	intronic	Garnl3	.	.	.	REDI	repetitive	12	0.25	1	0	8	0	1	0	N/A	N/A	5	0	2	0	N/A	N/A	1	0	2	0	1	0	N/A	N/A
	2	33028871	T	C	intronic	Garnl3	.	.	.	REDI	repetitive	17	0.235	3	0	8	0	16	0	11	0	11	0	2	0	N/A	N/A	1	0	N/A	N/A	1	0	1	0
	2	33039285	T	C	intronic	Garnl3	RADAR	repetitive	DARNED	REDI	repetitive	13	0.154	17	0	7	0	14	0.214	10	0	7	0	2	0	N/A	N/A	2	0	N/A	N/A	1	0	N/A	N/A
	2	33055881	T	C	intronic	Garnl3	.	.	.	REDI	repetitive	13	0.231	8	0	2	0	10	0	7	0	1	0	N/A	N/A	1	0	N/A	N/A	N/A	N/A	2	0	N/A	N/A
	2	33055969	T	C	intronic	Garnl3	.	.	.	REDI	repetitive	1	0	3	0.667	1	0	6	0	4	0	N/A	N/A	N/A	N/A	N/A	N/A	2	0	N/A	N/A	2	0	1	0
	2	33083558	T	C	intronic	Garnl3	.	.	.	REDI	repetitive	4	0.25	6	0	3	0	1	0	2	0	3	0	N/A	N/A	N/A	N/A	N/A	N/A	N/A	N/A	N/A	N/A	N/A	N/A
	2	33083580	T	C	intronic	Garnl3	.	.	.	REDI	repetitive	4	0.5	4	0	3	0	2	0	4	0	1	0	N/A	N/A	N/A	N/A	N/A	N/A	N/A	N/A	N/A	N/A	N/A	N/A
	2	33111621	T	C	intergenic	Garnl3;Ralgps1	.	.	.	REDI	repetitive	3	0	6	0	3	0	5	0.4	2	0	1	0	N/A	N/A	N/A	N/A	N/A	N/A	N/A	N/A	N/A	N/A	N/A	N/A
	2	33120564	T	C	intergenic	Garnl3;Ralgps1	.	.	.	REDI	non-repetitive	2	1	2	0	N/A	N/A	1	0	1	0	N/A	N/A	N/A	N/A	N/A	N/A	N/A	N/A	N/A	N/A	N/A	N/A	N/A	N/A
	2	33330975	T	C	intronic	Ralgps1	.	.	.	REDI	repetitive	8	0.375	6	0	N/A	N/A	N/A	N/A	8	0	1	0	7	0	2	0	6	0	2	0	1	0	1	0
	2	33331005	T	C	intronic	Ralgps1	.	.	.	REDI	repetitive	11	0.545	5	0	1	0	3	0	12	0	2	0	6	0	2	0	4	0	4	0	2	0	N/A	N/A
	2	33331006	T	C	intronic	Ralgps1	.	.	.	REDI	repetitive	11	0.636	5	0	1	0	3	0	12	0	2	0	6	0	2	0	4	0	4	0	2	0	N/A	N/A
	2	34069376	T	C	ncRNA_intronic	C230014O12Rik	.	.	.	REDI	repetitive	9	0.556	7	0.429	4	0	8	0	15	0	8	0	N/A	N/A	N/A	N/A	N/A	N/A	N/A	N/A	N/A	N/A	N/A	N/A
	2	34206812	T	C	intronic	Pbx3	.	.	.	REDI	repetitive	2	0	2	0	5	0.4	N/A	N/A	1	0	1	0	N/A	N/A	N/A	N/A	2	0	N/A	N/A	1	0	1	0
	2	34349542	T	C	intronic	Pbx3	.	.	.	REDI	repetitive	6	0	4	0.5	14	0	7	0	5	0	10	0	1	0	2	0	4	0	3	0	2	0	1	0
	2	34349848	T	C	intronic	Pbx3	.	.	.	REDI	repetitive	6	0.333	3	0	4	0	5	0	8	0	5	0	N/A	N/A	2	0	N/A	N/A	N/A	N/A	1	0	1	0
	2	34701667	T	C	intronic	Gapvd1	.	.	.	REDI	repetitive	5	0.4	9	0.444	7	0	2	0	4	0	9	0	15	0	6	0	9	0	10	0	8	0	7	0
	2	34701702	T	C	intronic	Gapvd1	.	.	.	REDI	repetitive	11	0	11	0.182	11	0	3	0	8	0	10	0	13	0	5	0	11	0	13	0	5	0	3	0
	2	34701715	T	C	intronic	Gapvd1	.	.	.	REDI	repetitive	8	0	11	0.182	11	0	3	0	8	0	11	0	14	0	6	0	11	0	13	0	6	0	3	0
	2	34703940	T	C	intronic	Gapvd1	.	.	.	REDI	repetitive	2	0	7	0.286	10	0	5	0	7	0	3	0	8	0	7	0	8	0	9	0	5	0	2	0
	2	34746154	T	C	intronic	Gapvd1	.	.	.	REDI	repetitive	5	0.4	6	0.5	6	0	6	0	12	0	8	0	11	0	20	0.15	11	0	15	0	7	0	1	0
	2	34747333	T	C	intronic	Gapvd1	.	.	.	REDI	repetitive	5	0.4	4	0	4	0	1	0	4	0	4	0	7	0	8	0	7	0	9	0	8	0	1	0
	2	34747390	T	C	intronic	Gapvd1	.	.	.	REDI	repetitive	3	0	7	0.286	5	0	4	0	1	0	6	0	6	0	5	0	5	0	8	0	10	0	4	0
	2	34816576	T	C	intronic	Fbxw2	RADAR	repetitive	DARNED	REDI	repetitive	7	0.286	7	0.286	4	0	3	0	3	0	6	0	17	0	10	0	11	0	19	0	14	0	8	0
	2	34816586	T	C	intronic	Fbxw2	RADAR	repetitive	DARNED	REDI	repetitive	8	0.25	7	0.286	4	0	3	0	2	0	7	0	22	0	12	0	13	0	19	0.316	17	0	7	0
	2	34823396	T	C	intronic	Fbxw2	.	.	.	REDI	repetitive	16	0.688	12	0.833	17	0	23	0	34	0	36	0	20	0.4	17	0.294	33	0	33	0	63	0	33	0
	2	37393562	T	C	intronic	Rc3h2	.	.	.	REDI	repetitive	9	0.778	13	0.692	4	0	6	0	15	0	11	0	36	0.167	20	0	39	0	22	0	23	0	22	0
	2	37393745	T	C	intronic	Rc3h2	.	.	.	REDI	repetitive	5	0.6	6	0	5	0	2	0	9	0	7	0	6	0	6	0	20	0	15	0	14	0	5	0
	2	37393783	T	C	intronic	Rc3h2	.	.	.	REDI	repetitive	7	0	7	0	7	0.714	5	0	11	0	10	0	20	0	8	0	28	0	17	0	12	0	15	0
	2	37393784	T	C	intronic	Rc3h2	.	.	.	REDI	repetitive	7	0.714	7	0.286	7	0.714	5	0	11	0	10	0	21	0	8	0	28	0	17	0	12	0	15	0
	2	37393798	T	C	intronic	Rc3h2	.	.	.	REDI	repetitive	6	0.667	9	0	5	0.8	5	0	12	0	8	0	23	0	9	0	31	0	16	0	12	0	15	0
	2	37393807	T	C	intronic	Rc3h2	.	.	.	REDI	repetitive	8	0	9	0	10	0.4	7	0	14	0	9	0	27	0	10	0	34	0	20	0	14	0	17	0
	2	37415406	T	C	intronic	Rc3h2	.	.	.	REDI	repetitive	11	0.182	11	0.182	15	0	8	0	11	0	26	0	22	0	24	0	22	0	31	0	31	0	20	0
	2	37415408	T	C	intronic	Rc3h2	.	.	.	REDI	repetitive	11	0.545	11	0.727	15	0	8	0	11	0	25	0	20	0	21	0.19	22	0	31	0	30	0	19	0
	2	37425912	T	C	UTR3	Zbtb6	.	.	.	REDI	repetitive	132	0	127	0	129	0	115	0	179	0	182	0	49	0	77	0.195	32	0	114	0.158	128	0	75	0
	2	37425939	T	C	UTR3	Zbtb6	.	.	.	REDI	repetitive	168	0	148	0	143	0	148	0	211	0	205	0	58	0	97	0.155	42	0	137	0	146	0	109	0
	2	37447667	A	G	intronic	Rabgap1	.	.	.	REDI	repetitive	9	0	7	0.286	2	0	5	0	1	0	4	0	5	0	6	0	11	0	5	0	12	0	2	0
	2	37510428	A	G	intronic	Rabgap1	.	.	.	REDI	repetitive	8	0	4	0.75	5	0	6	0	2	0	2	0	9	0	4	0	2	0	7	0	2	0	4	0
	2	37511270	A	G	intronic	Rabgap1	.	.	.	REDI	repetitive	8	0.25	6	0.333	6	0	5	0	5	0	7	0	5	0	2	0	8	0	10	0	4	0	3	0
	2	37542952	A	G	intronic	Rabgap1	.	.	.	REDI	repetitive	14	0.5	12	0.583	11	0	11	0	21	0	22	0	26	0	8	0	35	0	24	0	34	0	17	0
	2	37603275	T	C	intronic	Strbp	.	.	.	REDI	repetitive	13	0	17	0	18	0.222	12	0	16	0	14	0	20	0	22	0	18	0	28	0	8	0	6	0
	2	37603296	T	C	intronic	Strbp	.	.	.	REDI	repetitive	11	0	12	0	21	0	12	0.333	16	0	11	0	17	0	16	0	19	0	22	0	4	0	6	0
	2	37603719	T	C	intronic	Strbp	.	.	.	REDI	repetitive	15	0.133	13	0	8	0	8	0	25	0	24	0	27	0	22	0	15	0	25	0	9	0	13	0
	2	37670779	T	C	intergenic	Strbp;Crb2	RADAR	repetitive	DARNED	REDI	repetitive	4	0.75	4	0	3	0	3	0	1	0	2	0	9	0	2	0	4	0	6	0	4	0	6	0
	2	37670783	T	C	intergenic	Strbp;Crb2	.	.	.	REDI	repetitive	4	0	4	0	2	1	3	0	1	0	2	0	9	0	2	0	4	0	6	0	4	0	6	0
	2	37670842	T	C	intergenic	Strbp;Crb2	.	.	.	REDI	repetitive	6	0	3	0.667	4	0	2	0	6	0	4	0	10	0	2	0	6	0	9	0	4	0	6	0
	2	37670855	T	C	intergenic	Strbp;Crb2	.	.	.	REDI	repetitive	8	0	4	0	4	0	2	0	6	0	4	0	8	0.25	2	0	5	0	9	0	3	0	4	0
	2	37674375	T	C	intergenic	Strbp;Crb2	.	.	.	REDI	repetitive	9	0.222	7	0.571	15	0.4	6	0.333	11	0	11	0	12	0	6	0	9	0	23	0	6	0	11	0
	2	37674430	T	C	intergenic	Strbp;Crb2	.	.	.	REDI	repetitive	15	0.267	9	0.333	19	0	8	0	9	0	10	0	7	0	9	0	6	0	24	0	8	0	11	0
	2	37674621	T	C	intergenic	Strbp;Crb2	.	.	.	REDI	repetitive	7	0.429	3	0	7	0.429	2	0	11	0	4	0	11	0	7	0	8	0	17	0	13	0	2	0
	2	37681718	T	C	intergenic	Strbp;Crb2	RADAR	repetitive	DARNED	REDI	repetitive	11	0.273	11	0.273	3	0	17	0	8	0	13	0	13	0	3	0	11	0	25	0	17	0	6	0
	2	37683572	T	C	intergenic	Strbp;Crb2	.	.	.	REDI	repetitive	4	0	3	1	4	0	4	0.5	5	0	3	0	9	0	7	0	7	0	9	0	2	0	7	0
	2	37683583	T	C	intergenic	Strbp;Crb2	.	.	.	REDI	non-repetitive	3	0.667	3	1	5	0	2	0	6	0	3	0	11	0	5	0	10	0	10	0	2	0	8	0
	2	37683618	T	C	intergenic	Strbp;Crb2	.	.	.	REDI	non-repetitive	2	0	2	1	5	0	2	0	4	0	1	0	8	0	5	0	7	0	11	0	5	0	10	0
	2	37688847	T	C	intergenic	Strbp;Crb2	RADAR	repetitive	DARNED	REDI	repetitive	5	0.4	10	0	3	0	2	0	4	0	3	0	6	0	2	0	6	0	10	0	13	0	2	0
	2	37688859	T	C	intergenic	Strbp;Crb2	.	.	.	REDI	repetitive	5	0.2	8	0	4	0	2	0	5	0	4	0	4	0	2	0	8	0	11	0	14	0	3	0
	2	37695046	T	C	intergenic	Strbp;Crb2	RADAR	repetitive	DARNED	REDI	repetitive	3	0	4	0.5	7	0	3	0	6	0	5	0	10	0	8	0	18	0	10	0	8	0	14	0
	2	37696508	T	C	intergenic	Strbp;Crb2	.	.	.	REDI	repetitive	12	0	11	0.182	10	0	6	0	7	0	4	0	18	0	1	0	24	0	16	0	9	0	8	0
	2	37696520	T	C	intergenic	Strbp;Crb2	.	.	.	REDI	repetitive	10	0	11	0.182	10	0	6	0	5	0	3	0	19	0	1	0	25	0	15	0	10	0	8	0
	2	37806075	T	C	intronic	Dennd1a	.	.	.	REDI	repetitive	14	0.286	6	0	6	0.5	5	0	1	0	1	0	7	0	4	0	14	0	6	0	5	0	3	0
	2	37929086	T	C	intronic	Dennd1a	.	.	.	REDI	non-repetitive	3	0	7	0	4	0	2	0	6	0	3	0	14	0.143	11	0	17	0	10	0	6	0	5	0
	2	37929087	T	C	intronic	Dennd1a	.	.	.	REDI	non-repetitive	3	0	7	0	4	0	2	0	6	0	3	0	14	0.143	11	0	17	0	10	0	6	0	5	0
	2	38219953	T	C	intronic	Dennd1a	.	.	.	REDI	repetitive	N/A	N/A	1	0	3	0	N/A	N/A	2	0	N/A	N/A	4	0	6	0	4	0	13	0.154	7	0	5	0
	2	38240323	T	C	intronic	Dennd1a	.	.	.	REDI	repetitive	8	0	10	0.2	8	0	4	0	10	0	3	0	18	0	11	0	11	0	18	0	5	0	5	0
	2	38240330	T	C	intronic	Dennd1a	.	.	.	REDI	repetitive	8	0	10	0.2	8	0	4	0	12	0	3	0	16	0	10	0	10	0	18	0	5	0	5	0
	2	38240363	T	C	intronic	Dennd1a	.	.	.	REDI	repetitive	8	0	10	0.3	8	0	7	0	9	0	1	0	19	0	6	0	11	0	18	0	1	0	6	0
	2	38240368	T	C	intronic	Dennd1a	.	.	.	REDI	repetitive	8	0	10	0.3	8	0	7	0.286	9	0	1	0	17	0	6	0	11	0	21	0	1	0	6	0
	2	38887348	T	C	intronic	Nr6a1	.	.	.	REDI	repetitive	1	0	N/A	N/A	3	0	2	0	2	0	4	0	5	0	2	0	4	0	4	0.5	1	0	N/A	N/A
	2	39050760	T	C	intronic	Golga1	.	.	.	REDI	repetitive	1	0	2	1	1	0	N/A	N/A	N/A	N/A	N/A	N/A	N/A	N/A	N/A	N/A	1	0	N/A	N/A	N/A	N/A	1	0
	2	39050764	T	C	intronic	Golga1	.	.	.	REDI	repetitive	N/A	N/A	2	1	2	0	N/A	N/A	N/A	N/A	N/A	N/A	N/A	N/A	N/A	N/A	N/A	N/A	N/A	N/A	N/A	N/A	2	0
	2	39050777	T	C	intronic	Golga1	.	.	.	REDI	repetitive	N/A	N/A	2	1	2	0	N/A	N/A	N/A	N/A	N/A	N/A	N/A	N/A	N/A	N/A	N/A	N/A	N/A	N/A	N/A	N/A	2	0
	2	39105036	T	C	intronic	Scai	.	.	.	REDI	repetitive	6	0.5	3	0	6	0	6	0	1	0	5	0	6	0	9	0	7	0	11	0	3	0	5	0
	2	39105040	T	C	intronic	Scai	.	.	.	REDI	repetitive	6	0.5	3	0	6	0	6	0	1	0	5	0	9	0	9	0	6	0	12	0	3	0	7	0
	2	39105049	T	C	intronic	Scai	.	.	.	REDI	repetitive	7	0.571	1	0	6	0	6	0	N/A	N/A	3	0	7	0	10	0	8	0	10	0	5	0	8	0
	2	39155550	T	C	intronic	Scai	.	.	.	REDI	repetitive	3	0	9	0.333	1	0	4	0	3	0	3	0	7	0	6	0	5	0	16	0	2	0	9	0
	2	39157584	T	C	ncRNA_exonic	Gm16523	.	.	.	REDI	repetitive	6	0.5	3	0	N/A	N/A	3	0	3	0	3	0	10	0	7	0	5	0	12	0	4	0	N/A	N/A
	2	39158801	T	C	ncRNA_exonic	Gm16523	.	.	.	REDI	repetitive	4	0	N/A	N/A	3	0	2	0	2	0	3	0	8	0.375	3	0	5	0	4	0	5	0	3	0
	2	39168067	T	C	intronic	Scai	.	.	.	REDI	repetitive	8	0	4	0	3	0	2	1	3	0	1	0	5	0	N/A	N/A	4	0	4	0	6	0	7	0
	2	39173329	T	C	intronic	Scai	.	.	.	REDI	repetitive	11	0	7	0	3	0	7	0.286	5	0	3	0	12	0	18	0	24	0	16	0	10	0	6	0
	2	42034831	T	C	intronic	Lrp1b	.	.	.	REDI	repetitive	2	0	3	0.667	N/A	N/A	3	0	2	0	1	0	N/A	N/A	N/A	N/A	N/A	N/A	N/A	N/A	N/A	N/A	2	0
	2	42133874	T	C	intronic	Lrp1b	.	.	.	REDI	non-repetitive	5	0.4	2	0	2	0	2	0	12	0	4	0	N/A	N/A	N/A	N/A	N/A	N/A	N/A	N/A	N/A	N/A	N/A	N/A
	2	42138514	T	C	intronic	Lrp1b	.	.	.	REDI	repetitive	4	0	4	0.5	3	0	3	0.667	4	0	2	0	N/A	N/A	N/A	N/A	N/A	N/A	N/A	N/A	N/A	N/A	3	0
	2	42293563	T	C	intronic	Lrp1b	.	.	.	REDI	non-repetitive	8	0	1	0	9	0	2	1	14	0	7	0	N/A	N/A	N/A	N/A	N/A	N/A	N/A	N/A	N/A	N/A	2	0
	2	42473237	T	C	intronic	Lrp1b	.	.	.	REDI	repetitive	N/A	N/A	1	1	N/A	N/A	4	0.5	N/A	N/A	1	0	N/A	N/A	N/A	N/A	N/A	N/A	N/A	N/A	1	0	1	0
	2	42549304	T	C	intronic	Lrp1b	.	.	.	REDI	repetitive	5	0	6	0.333	6	0	3	0	1	0	4	0	N/A	N/A	N/A	N/A	N/A	N/A	N/A	N/A	N/A	N/A	N/A	N/A
	2	42603891	T	C	intronic	Lrp1b	.	.	.	REDI	repetitive	N/A	N/A	5	0.4	6	0	N/A	N/A	6	0	7	0	N/A	N/A	N/A	N/A	N/A	N/A	N/A	N/A	N/A	N/A	N/A	N/A
	2	42631874	T	C	intronic	Lrp1b	.	.	.	REDI	repetitive	7	0.286	5	0.4	1	0	2	0	2	0	2	0	N/A	N/A	N/A	N/A	N/A	N/A	N/A	N/A	N/A	N/A	N/A	N/A
	2	42631875	T	C	intronic	Lrp1b	.	.	.	REDI	repetitive	7	0.286	5	0.4	1	0	2	0	2	0	2	0	N/A	N/A	N/A	N/A	N/A	N/A	N/A	N/A	N/A	N/A	N/A	N/A
	2	42631904	T	C	intronic	Lrp1b	.	.	.	REDI	repetitive	13	0.538	5	0.4	2	0	1	0	1	0	N/A	N/A	N/A	N/A	N/A	N/A	N/A	N/A	N/A	N/A	N/A	N/A	N/A	N/A
	2	42632872	T	C	intronic	Lrp1b	.	.	.	REDI	repetitive	5	0	2	1	3	0.667	3	0	7	0	2	0	N/A	N/A	N/A	N/A	N/A	N/A	1	0	N/A	N/A	N/A	N/A
	2	42632971	T	C	intronic	Lrp1b	.	.	.	REDI	repetitive	5	0.4	3	0	N/A	N/A	1	0	6	0	4	0	N/A	N/A	N/A	N/A	N/A	N/A	N/A	N/A	N/A	N/A	2	0
	2	44849904	T	C	intronic	Gtdc1	.	.	.	REDI	repetitive	5	0.4	5	0	4	0	3	0	4	0	1	0	11	0.182	3	0	14	0	2	0	10	0	2	0
	2	44850236	T	C	intronic	Gtdc1	.	.	.	REDI	repetitive	N/A	N/A	3	0.667	1	0	1	0	4	0	3	0	13	0	10	0	15	0	10	0	12	0	18	0
	2	44891688	T	C	intergenic	Gtdc1;Zeb2	.	.	.	REDI	repetitive	1	0	4	0	N/A	N/A	4	0.5	4	0	2	0	15	0	2	0	10	0	12	0	6	0	4	0
	2	44891704	T	C	intergenic	Gtdc1;Zeb2	.	.	.	REDI	repetitive	N/A	N/A	1	1	1	0	3	0.667	5	0	2	0	15	0	1	0	15	0	12	0	5	0	3	0
	2	45035326	T	C	intronic	Zeb2	.	.	.	REDI	repetitive	5	0.8	4	0	4	0	N/A	N/A	4	0	4	0	1	0	N/A	N/A	2	0	1	0	3	0	2	0
	2	45035327	T	C	intronic	Zeb2	.	.	.	REDI	repetitive	5	0.8	4	0	4	0	N/A	N/A	4	0	4	0	1	0	N/A	N/A	2	0	1	0	3	0	2	0
	2	45035351	T	C	intronic	Zeb2	.	.	.	REDI	repetitive	3	0	3	0.667	4	0	N/A	N/A	5	0	3	0	2	0	N/A	N/A	2	0	2	0	3	0	1	0
	2	48895351	A	G	intronic	Acvr2a	.	.	.	REDI	non-repetitive	31	0	28	0.25	27	0	19	0.316	43	0	36	0	22	0	6	0	37	0	11	0	38	0	35	0
	2	49141873	A	G	intronic	Mbd5	.	.	.	REDI	repetitive	1	0	N/A	N/A	4	0	N/A	N/A	N/A	N/A	N/A	N/A	6	0.333	1	0	2	0	2	0	N/A	N/A	2	0
	2	49200325	A	G	intronic	Mbd5	.	.	.	REDI	repetitive	2	0	N/A	N/A	1	1	1	0	5	0	1	0	7	0	4	0	4	0	13	0	4	0	2	0
	2	49200385	A	G	intronic	Mbd5	.	.	.	REDI	repetitive	2	0	2	0	N/A	N/A	N/A	N/A	5	0	1	0	6	0	8	0	6	0	11	0.273	3	0	N/A	N/A
	2	49200392	A	G	intronic	Mbd5	.	.	.	REDI	repetitive	2	0	2	0	N/A	N/A	N/A	N/A	5	0	1	0	7	0	9	0	6	0	10	0.2	3	0	N/A	N/A
	2	52626007	T	C	intronic	Cacnb4	RADAR	repetitive	DARNED	REDI	repetitive	7	0.286	2	0	1	0	1	0	2	0	1	0	N/A	N/A	N/A	N/A	N/A	N/A	N/A	N/A	N/A	N/A	N/A	N/A
	2	52652620	T	C	intronic	Cacnb4	.	.	.	REDI	non-repetitive	N/A	N/A	1	0	5	0.4	1	0	3	0	4	0	N/A	N/A	N/A	N/A	3	0	N/A	N/A	N/A	N/A	N/A	N/A
	2	52652650	T	C	intronic	Cacnb4	.	.	.	REDI	non-repetitive	N/A	N/A	2	0	4	0.5	2	0	2	0	4	0	N/A	N/A	N/A	N/A	3	0	N/A	N/A	1	0	2	0
	2	52653009	T	C	intronic	Cacnb4	.	.	.	REDI	repetitive	6	0.333	2	0	2	0	N/A	N/A	N/A	N/A	1	0	1	0	N/A	N/A	N/A	N/A	N/A	N/A	N/A	N/A	N/A	N/A
	2	52880468	A	G	intronic	Fmnl2	.	.	.	REDI	repetitive	7	0.286	2	0	2	0	1	0	1	0	1	0	2	0	7	0	4	0	2	0	2	0	1	0
	2	53022567	A	G	intronic	Fmnl2	.	.	.	REDI	non-repetitive	1	0	5	0.6	3	0	4	0	1	0	N/A	N/A	4	0	6	0	2	0	10	0	2	0	3	0
	2	53167031	T	C	intronic	Prpf40a	.	.	.	REDI	repetitive	5	0.4	3	0	5	0	1	0	9	0	16	0	55	0	72	0	56	0	66	0	54	0	52	0
	2	54588643	A	G	intronic	Galnt13	.	.	.	REDI	repetitive	4	0	9	0.222	3	0	N/A	N/A	7	0	4	0	1	0	N/A	N/A	N/A	N/A	N/A	N/A	1	0	N/A	N/A
	2	54588972	A	G	intronic	Galnt13	.	.	.	REDI	repetitive	1	0	4	0.75	5	0	N/A	N/A	9	0	4	0	N/A	N/A	N/A	N/A	1	0	N/A	N/A	N/A	N/A	1	0
	2	55091407	A	G	intronic	Galnt13	.	.	.	REDI	repetitive	3	0	N/A	N/A	3	0.667	2	0	1	0	N/A	N/A	N/A	N/A	N/A	N/A	N/A	N/A	N/A	N/A	N/A	N/A	1	0
	2	55091415	A	G	intronic	Galnt13	.	.	.	REDI	repetitive	3	0	N/A	N/A	3	0	1	1	1	0	N/A	N/A	N/A	N/A	N/A	N/A	N/A	N/A	N/A	N/A	N/A	N/A	1	0
	2	58592567	A	G	intronic	Upp2	.	.	.	REDI	repetitive	1	0	N/A	N/A	4	0.5	N/A	N/A	N/A	N/A	N/A	N/A	N/A	N/A	N/A	N/A	N/A	N/A	N/A	N/A	N/A	N/A	2	0
	2	58610704	A	G	intronic	Upp2	.	.	.	REDI	repetitive	1	0	2	1	N/A	N/A	N/A	N/A	N/A	N/A	1	0	N/A	N/A	1	0	N/A	N/A	N/A	N/A	N/A	N/A	1	0
	2	59165944	A	G	intronic	Pkp4	.	.	.	REDI	repetitive	3	1	6	0	1	0	4	0	3	0	4	0	6	0	1	0	3	0	4	0	4	0	1	0
	2	59165964	A	G	intronic	Pkp4	.	.	.	REDI	repetitive	5	0	6	0	2	0	5	0	3	0	3	0	5	0	3	0	4	0.5	4	0	3	0	1	0
	2	59166698	A	G	intronic	Pkp4	.	.	.	REDI	repetitive	6	0.667	3	0	2	0	4	0	5	0	3	0	8	0	2	0	6	0	N/A	N/A	4	0	3	0
	2	59937433	T	C	intronic	Baz2b	.	.	.	REDI	non-repetitive	2	0.5	1	0	4	0	1	0	2	0	1	0	3	0	17	0	6	0	17	0	10	0	8	0
	2	59938049	T	C	intronic	Baz2b	.	.	.	REDI	non-repetitive	2	0	N/A	N/A	5	0	6	0	4	0	4	0	7	0	15	0.267	6	0	22	0	10	0	2	0
	2	60112841	T	C	intronic	Baz2b	.	.	.	REDI	repetitive	5	0.4	4	0	4	0	N/A	N/A	5	0	7	0	28	0	14	0	32	0	20	0	8	0	14	0
	2	60116841	T	C	intronic	Baz2b	.	.	.	REDI	repetitive	7	0	4	0.5	5	0	8	0	5	0	17	0	23	0	14	0	17	0	23	0	27	0	21	0
	2	60116849	T	C	intronic	Baz2b	.	.	.	REDI	repetitive	6	0	3	0.667	6	0	6	0	5	0	20	0	21	0	12	0	17	0	23	0	23	0	18	0
	2	61731425	A	G	intronic	Psmd14	.	.	.	REDI	repetitive	6	0.333	12	0	4	0	8	0	28	0	14	0	39	0	15	0	36	0	22	0	27	0	33	0
	2	62974053	T	C	intronic	Kcnh7	.	.	.	REDI	repetitive	4	0	5	0.4	1	0	N/A	N/A	2	0	N/A	N/A	N/A	N/A	N/A	N/A	N/A	N/A	N/A	N/A	1	0	N/A	N/A
	2	62974055	T	C	intronic	Kcnh7	.	.	.	REDI	repetitive	5	0	5	0.4	1	0	N/A	N/A	2	0	N/A	N/A	N/A	N/A	N/A	N/A	N/A	N/A	N/A	N/A	1	0	N/A	N/A
	2	62982301	T	C	intronic	Kcnh7	.	.	.	REDI	non-repetitive	N/A	N/A	1	0	1	0	4	0.5	4	0	2	0	N/A	N/A	N/A	N/A	N/A	N/A	N/A	N/A	N/A	N/A	N/A	N/A
	2	62982414	T	C	intronic	Kcnh7	.	.	.	REDI	non-repetitive	10	0.2	1	0	2	0	4	0	N/A	N/A	5	0	N/A	N/A	N/A	N/A	N/A	N/A	N/A	N/A	N/A	N/A	2	0
	2	62982428	T	C	intronic	Kcnh7	RADAR	non-repetitive	DARNED	REDI	non-repetitive	10	0.2	1	0	4	0	4	0	N/A	N/A	7	0	N/A	N/A	N/A	N/A	N/A	N/A	N/A	N/A	N/A	N/A	2	0
	2	62982454	T	C	intronic	Kcnh7	RADAR	non-repetitive	DARNED	REDI	non-repetitive	7	0.286	2	0	3	0	4	0	N/A	N/A	8	0	N/A	N/A	N/A	N/A	N/A	N/A	N/A	N/A	N/A	N/A	1	0
	2	63020153	T	C	intronic	Kcnh7	.	.	.	REDI	non-repetitive	1	0	2	1	6	0	3	0	10	0	2	0	N/A	N/A	1	0	N/A	N/A	N/A	N/A	N/A	N/A	N/A	N/A
	2	63020156	T	C	intronic	Kcnh7	.	.	.	REDI	non-repetitive	1	0	2	1	6	0	3	0.333	10	0	2	0	N/A	N/A	1	0	N/A	N/A	N/A	N/A	N/A	N/A	N/A	N/A
	2	63022530	T	C	intronic	Kcnh7	.	.	.	REDI	repetitive	4	0.75	6	0.333	4	0	6	0	5	0	11	0	N/A	N/A	N/A	N/A	N/A	N/A	N/A	N/A	2	0	2	0
	2	65315713	T	C	downstream	Slc38a11	RADAR	repetitive	DARNED	REDI	repetitive	5	0	8	0.25	6	0	2	0	7	0	4	0	1	0	N/A	N/A	N/A	N/A	1	0	4	0	N/A	N/A
	2	65672777	A	G	intronic	Scn2a	RADAR	repetitive	DARNED	REDI	repetitive	13	0.615	4	0.75	2	0.5	7	0	9	0	10	0	N/A	N/A	N/A	N/A	N/A	N/A	1	0	N/A	N/A	3	0
	2	65672785	A	G	intronic	Scn2a	.	.	.	REDI	repetitive	14	0.357	4	0	4	0	8	0	12	0	10	0	N/A	N/A	N/A	N/A	N/A	N/A	1	0	N/A	N/A	2	0
	2	65678024	A	G	intronic	Scn2a	.	.	.	REDI	repetitive	11	0.182	12	0	11	0	15	0.2	14	0	11	0	N/A	N/A	N/A	N/A	N/A	N/A	N/A	N/A	3	0	N/A	N/A
	2	65678031	A	G	intronic	Scn2a	.	.	.	REDI	repetitive	11	0	10	0.2	11	0	15	0	14	0	10	0	N/A	N/A	N/A	N/A	N/A	N/A	N/A	N/A	3	0	N/A	N/A
	2	65678032	A	G	intronic	Scn2a	.	.	.	REDI	repetitive	11	0	10	0.4	11	0	15	0	14	0	10	0	N/A	N/A	N/A	N/A	N/A	N/A	N/A	N/A	3	0	N/A	N/A
	2	65678095	A	G	intronic	Scn2a	.	.	.	REDI	repetitive	20	0	13	0.231	8	0.25	18	0.333	20	0	16	0	N/A	N/A	N/A	N/A	N/A	N/A	1	0	2	0	N/A	N/A
	2	65678110	A	G	intronic	Scn2a	.	.	.	REDI	repetitive	16	0	9	0.222	9	0	22	0	20	0	14	0	N/A	N/A	N/A	N/A	N/A	N/A	1	0	3	0	N/A	N/A
	2	65678122	A	G	intronic	Scn2a	RADAR	repetitive	DARNED	REDI	repetitive	14	0.214	7	0.286	7	0	19	0.368	13	0	15	0	N/A	N/A	N/A	N/A	N/A	N/A	1	0	2	0	N/A	N/A
	2	65698955	A	G	intronic	Scn2a	.	.	.	REDI	non-repetitive	2	1	N/A	N/A	2	0	2	0	2	0	3	0	N/A	N/A	N/A	N/A	N/A	N/A	N/A	N/A	N/A	N/A	N/A	N/A
	2	66012522	A	G	intronic	Csrnp3	.	.	.	REDI	repetitive	N/A	N/A	3	1	1	0	1	0	1	0	N/A	N/A	N/A	N/A	N/A	N/A	N/A	N/A	N/A	N/A	3	0	4	0
	2	66203542	T	C	intronic	Ttc21b	.	.	.	REDI	repetitive	4	0.5	N/A	N/A	5	0	2	0	1	0	5	0	N/A	N/A	5	0	N/A	N/A	6	0	2	0	12	0
	2	69659947	A	G	intronic	Bbs5	.	.	.	REDI	repetitive	3	0	4	0.5	2	0	3	0	4	0	1	0	1	0	N/A	N/A	2	0	1	0	3	0	2	0
	2	69659948	A	G	intronic	Bbs5	.	.	.	REDI	repetitive	3	0	4	0.5	2	0	3	0	4	0	1	0	1	0	N/A	N/A	2	0	1	0	3	0	1	0
	2	69738931	A	G	intronic	Ppig	.	.	.	REDI	repetitive	2	1	7	0.571	4	0.5	2	0	2	0	5	0	19	0.421	8	0	17	0	15	0	6	0	7	0
	2	69738935	A	G	intronic	Ppig	.	.	.	REDI	repetitive	2	1	7	0.286	5	0	2	0	2	0	7	0	23	0	8	0	19	0	15	0	6	0	6	0
	2	69739255	A	G	intronic	Ppig	.	.	.	REDI	repetitive	7	0.429	2	0	4	0	4	0	6	0	4	0	21	0	7	0	24	0	4	0	8	0	14	0
	2	69872326	A	G	intronic	Mettl5	.	.	.	REDI	repetitive	1	0	3	0	4	0	6	0	6	0.333	5	0	2	0	7	0	5	0	7	0	5	0	8	0
	2	69872351	A	G	intronic	Mettl5	.	.	.	REDI	repetitive	3	0	5	0	6	0	7	0	6	0.333	5	0	3	0	9	0	4	0	7	0	9	0	8	0
	2	69876840	T	C	intronic	Mettl5	.	.	.	REDI	repetitive	4	0	7	0.286	5	0	4	0	4	0	1	0	5	0	5	0	1	0	9	0	4	0	3	0
	2	69876844	T	C	intronic	Mettl5	RADAR	repetitive	DARNED	REDI	repetitive	3	0	7	0.857	5	0	4	0	4	0	1	0	5	0	5	0	N/A	N/A	8	0	4	0	3	0
	2	69936348	A	G	intronic	Ubr3	.	.	.	REDI	non-repetitive	7	0.286	6	0	2	0	2	0	9	0	9	0	9	0	19	0	5	0	21	0	17	0	9	0
	2	69949810	A	G	intronic	Ubr3	.	.	.	REDI	repetitive	6	0.333	12	0.5	4	0	6	0	9	0	7	0	9	0	8	0	11	0	7	0	17	0	5	0
	2	69989565	A	G	intronic	Ubr3	.	.	.	REDI	non-repetitive	5	0.4	1	0	5	0	2	0	8	0	6	0	5	0	N/A	N/A	7	0	3	0	4	0	4	0
	2	69994534	A	G	intronic	Ubr3	.	.	.	REDI	repetitive	9	0	8	0.25	13	0	8	0	17	0	7	0	19	0	41	0	34	0	50	0	7	0	15	0
	2	70669149	A	G	intronic	Gorasp2	.	.	.	REDI	repetitive	3	0	4	0.5	3	0	5	0	5	0	5	0	15	0	7	0	8	0	13	0	8	0	11	0
	2	70734584	T	C	intronic	Tlk1	.	.	.	REDI	non-repetitive	5	0.4	2	0	2	0	1	0	3	0	5	0	15	0	25	0	6	0	30	0	8	0	5	0
	2	70734591	T	C	intronic	Tlk1	.	.	.	REDI	non-repetitive	5	0.4	1	1	2	0	N/A	N/A	3	0	6	0	15	0.133	22	0.364	4	0	30	0	7	0	5	0
	2	70734605	T	C	intronic	Tlk1	.	.	.	REDI	non-repetitive	4	0.5	2	0	2	0	N/A	N/A	3	0	5	0	17	0	22	0	5	0	32	0	9	0	7	0
	2	70763387	T	C	intronic	Tlk1	.	.	.	REDI	repetitive	3	0	2	1	N/A	N/A	1	0	3	0	5	0	17	0	18	0	8	0	28	0	9	0	3	0
	2	71222553	A	G	intronic	Dync1i2	RADAR	repetitive	.	REDI	repetitive	20	0.15	17	0.294	22	0	11	0	11	0	16	0	5	0	3	0	N/A	N/A	4	0	3	0	2	0
	2	71231006	A	G	intronic	Dync1i2	.	.	.	REDI	repetitive	16	0.625	8	0.625	11	0	10	0.2	14	0	17	0	14	0	24	0	9	0	31	0	10	0	4	0
	2	71362027	T	C	intronic	Slc25a12	.	.	.	REDI	repetitive	4	0	3	0.333	1	0	3	0	3	0	1	0	4	0	9	0	3	0	8	0	9	0	6	0
	2	71362036	T	C	intronic	Slc25a12	.	.	.	REDI	repetitive	4	0	4	0.25	1	0	3	0	3	0	1	0	4	0	8	0	3	0	7	0	9	0	4	0
	2	71885478	A	G	ncRNA_intronic	Mir5098	RADAR	repetitive	DARNED	REDI	repetitive	13	0.154	6	0	2	0	2	0	5	0	3	0	38	0	10	0	30	0	35	0	26	0	20	0
	2	72050118	A	G	intronic	Rapgef4	.	.	.	REDI	repetitive	2	0	2	0.5	3	0	2	0	1	0	N/A	N/A	N/A	N/A	N/A	N/A	1	0	N/A	N/A	3	0	2	0
	2	72091055	A	G	intronic	Rapgef4	.	.	.	REDI	repetitive	2	0	1	0	2	1	2	0	1	0	N/A	N/A	1	0	1	0	1	0	N/A	N/A	1	0	1	0
	2	72937237	T	C	UTR3	Sp3	.	.	.	REDI	non-repetitive	88	0	87	0	70	0	76	0	183	0	165	0	183	0	558	0.138	168	0	702	0	333	0	190	0
	2	72982071	A	G	ncRNA_intronic	Sp3os	.	.	.	REDI	repetitive	6	0	3	0.667	4	0	2	0	6	0	8	0	7	0	17	0	14	0	12	0	4	0	5	0
	2	72982072	A	G	ncRNA_intronic	Sp3os	.	.	.	REDI	repetitive	6	0	3	0.667	4	0	2	0	6	0	8	0	7	0	17	0	14	0	12	0	4	0	5	0
	2	73116182	T	C	intronic	Ola1	.	.	.	REDI	repetitive	N/A	N/A	2	0	2	1	2	0	N/A	N/A	N/A	N/A	1	0	1	0	3	0	1	0	3	0	N/A	N/A
	2	73147072	T	C	intronic	Ola1	.	.	.	REDI	repetitive	3	0	6	0.333	6	0	1	0	3	0	N/A	N/A	5	0	2	0	2	0	8	0	6	0	3	0
	2	73621729	T	C	intronic	Chn1	RADAR	repetitive	DARNED	REDI	repetitive	6	0.333	4	0	3	0	3	0	13	0	13	0	N/A	N/A	N/A	N/A	N/A	N/A	N/A	N/A	1	0	2	0
	2	73621735	T	C	intronic	Chn1	RADAR	repetitive	DARNED	REDI	repetitive	5	0.4	4	0	4	0	3	0	12	0	14	0	N/A	N/A	N/A	N/A	N/A	N/A	N/A	N/A	1	0	2	0
	2	73621736	T	C	intronic	Chn1	RADAR	repetitive	DARNED	REDI	repetitive	5	0.4	4	0	4	0	3	0	12	0	14	0	N/A	N/A	N/A	N/A	N/A	N/A	N/A	N/A	1	0	2	0
	2	73649220	T	C	intronic	Chn1	.	.	.	REDI	repetitive	5	0.8	N/A	N/A	2	0	1	0	1	0	N/A	N/A	N/A	N/A	N/A	N/A	N/A	N/A	N/A	N/A	N/A	N/A	N/A	N/A
	2	73649226	T	C	intronic	Chn1	.	.	.	REDI	repetitive	5	0.4	N/A	N/A	2	0	1	0	1	0	N/A	N/A	N/A	N/A	N/A	N/A	N/A	N/A	N/A	N/A	N/A	N/A	N/A	N/A
	2	73649238	T	C	intronic	Chn1	.	.	.	REDI	repetitive	4	0.25	N/A	N/A	3	0	1	0	1	0	N/A	N/A	N/A	N/A	N/A	N/A	N/A	N/A	N/A	N/A	N/A	N/A	N/A	N/A
	2	73813285	T	C	intergenic	Chn1;Atf2	RADAR	repetitive	DARNED	REDI	repetitive	8	0	12	0.25	6	0	8	0	7	0	7	0	1	0	2	0	1	0	N/A	N/A	3	0	1	0
	2	73839881	T	C	intronic	Atf2	.	.	.	REDI	repetitive	11	0.182	6	0	9	0	6	0	4	0	3	0	28	0	13	0	25	0	9	0	17	0	15	0
	2	73858082	T	C	intronic	Atf2	.	.	.	REDI	repetitive	1	0	3	0	3	0	2	0	3	0	9	0	11	0.273	8	0	16	0	12	0	9	0	2	0
	2	74539690	T	C	intronic	Lnpk	.	.	.	REDI	repetitive	5	0.4	5	0	6	0	3	0	10	0	7	0	15	0	20	0	30	0	10	0	13	0	3	0
	2	74541092	T	C	intronic	Lnpk	.	.	.	REDI	repetitive	5	0	3	0	1	0	1	0	6	0	3	0	2	0	4	0	2	0	10	0.2	13	0	5	0
	2	77689663	T	C	intronic	Zfp385b	.	.	.	REDI	repetitive	5	0.4	3	0	6	0	N/A	N/A	3	0	4	0	N/A	N/A	N/A	N/A	N/A	N/A	N/A	N/A	N/A	N/A	N/A	N/A
	2	77693246	T	C	intronic	Zfp385b	.	.	.	REDI	repetitive	1	0	2	0	3	0	6	0.667	2	0	3	0	2	0	N/A	N/A	N/A	N/A	N/A	N/A	1	0	N/A	N/A
	2	80345769	A	G	intronic	Dnajc10	.	.	.	REDI	repetitive	8	0.375	5	0.4	5	0	N/A	N/A	7	0	12	0	9	0	19	0	9	0	22	0	12	0	6	0
	2	80543802	T	C	intronic	Nckap1	.	.	.	REDI	repetitive	8	0	6	0.333	14	0	5	0	10	0	10	0	11	0	4	0	10	0	2	0	7	0	2	0
	2	80544387	T	C	intronic	Nckap1	.	.	.	REDI	repetitive	14	0	11	0.364	5	0	9	0	13	0	8	0	10	0	1	0	6	0	1	0	2	0	3	0
	2	80544461	T	C	intronic	Nckap1	.	.	.	REDI	repetitive	11	0.455	6	0	2	0	4	0	2	0	9	0	7	0	N/A	N/A	4	0	4	0	6	0	5	0
	2	80567103	T	C	intronic	Nckap1	.	.	.	REDI	repetitive	15	0	13	0	20	0	10	0.2	21	0	16	0	10	0	5	0	9	0	1	0	10	0	8	0
	2	80576405	T	C	intronic	Nckap1	.	.	.	REDI	repetitive	6	0	15	0.333	10	0.4	4	0.5	7	0	7	0	5	0.4	1	0	5	0	N/A	N/A	1	0	3	0
	2	80576409	T	C	intronic	Nckap1	.	.	.	REDI	repetitive	4	0	19	0.158	10	0	4	0	6	0	7	0	4	0	N/A	N/A	5	0	N/A	N/A	1	0	3	0
	2	82057712	A	G	intronic	Zfp804a	.	.	.	REDI	non-repetitive	14	0.143	17	0	14	0	7	0	30	0	27	0	N/A	N/A	N/A	N/A	1	0	N/A	N/A	3	0	1	0
	2	82068285	A	G	intronic	Zfp804a	.	.	.	REDI	repetitive	15	0	12	0.25	8	0	13	0	6	0	22	0	N/A	N/A	N/A	N/A	N/A	N/A	N/A	N/A	N/A	N/A	2	0
	2	82111070	A	G	intronic	Zfp804a	.	.	.	REDI	repetitive	9	0	11	0.364	12	0	5	0	14	0	7	0	N/A	N/A	N/A	N/A	N/A	N/A	N/A	N/A	1	0	N/A	N/A
	2	82112236	A	G	intronic	Zfp804a	.	.	.	REDI	repetitive	6	0.333	9	0.222	14	0	6	0	6	0	2	0	2	0	N/A	N/A	N/A	N/A	N/A	N/A	1	0	N/A	N/A
	2	82112237	A	G	intronic	Zfp804a	.	.	.	REDI	repetitive	8	0.25	14	0	14	0	6	0	6	0	2	0	2	0	N/A	N/A	N/A	N/A	N/A	N/A	1	0	N/A	N/A
	2	82112341	A	G	intronic	Zfp804a	.	.	.	REDI	repetitive	3	0.333	7	0	4	0	3	0	3	0	1	0	2	0	N/A	N/A	N/A	N/A	N/A	N/A	1	0	N/A	N/A
	2	82112347	A	G	intronic	Zfp804a	.	.	.	REDI	repetitive	4	0.5	9	0	6	0	6	0	6	0	1	0	2	0	N/A	N/A	N/A	N/A	N/A	N/A	1	0	N/A	N/A
	2	84332775	T	C	UTR3	Calcrl	.	.	.	REDI	non-repetitive	38	0	31	0	19	0.158	27	0	29	0	28	0	66	0	102	0.216	66	0	171	0.234	78	0.192	42	0.19
	2	84674646	T	C	intronic	Tmx2	.	.	.	REDI	repetitive	8	0.25	4	0	10	0	8	0.25	8	0	14	0	3	0	5	0	4	0	6	0	3	0	4	0
	2	84674654	T	C	intronic	Tmx2	.	.	.	REDI	repetitive	9	0.333	4	0	10	0	8	0	7	0	7	0	3	0	5	0	3	0	7	0	3	0	4	0
	2	84674671	T	C	intronic	Tmx2	.	.	.	REDI	repetitive	8	0.75	3	0.667	7	0.286	7	0.429	6	0	7	0	6	0	5	0	1	0	7	0	3	0	2	0
	2	84809672	A	G	UTR3	Ube2l6	RADAR	repetitive	.	.	.	23	0.261	16	0	28	0.25	20	0	8	0	18	0	54	0.185	21	0.429	49	0.306	32	0.188	110	0.327	37	0.649
	2	90437364	T	C	intronic	Ptprj	.	.	.	REDI	repetitive	2	1	N/A	N/A	2	0	N/A	N/A	2	0	2	0	1	0	N/A	N/A	N/A	N/A	1	0	4	0	1	0
	2	90538079	T	C	intronic	Ptprj	.	.	.	REDI	repetitive	4	0.5	5	0	1	0	5	0	5	0	4	0	5	0	3	0	4	0	7	0	2	0	N/A	N/A
	2	90548568	T	C	intronic	Ptprj	RADAR	repetitive	DARNED	REDI	repetitive	3	0.667	4	0	3	0	6	0.5	6	0	4	0	7	0	2	0	3	0	4	0	2	0	4	0
	2	90555980	T	C	intronic	Ptprj	.	.	.	REDI	repetitive	9	0.333	8	0	1	0	1	0	8	0	10	0	6	0	10	0.2	4	0	13	0	5	0	3	0
	2	90556033	T	C	intronic	Ptprj	.	.	.	REDI	repetitive	9	0	8	0	3	0	3	0.667	9	0	5	0	5	0	8	0	3	0	9	0	4	0	2	0
	2	90556038	T	C	intronic	Ptprj	.	.	.	REDI	repetitive	9	0	8	0.375	3	0	3	0	11	0	5	0	5	0.4	7	0	3	0	7	0	4	0	2	0
	2	90559778	T	C	intronic	Ptprj	.	.	.	REDI	repetitive	4	0.25	1	0	N/A	N/A	2	0	4	0	2	0	1	0	N/A	N/A	2	0	4	0	2	0	2	0
	2	90723868	A	G	intronic	Nup160	.	.	.	REDI	repetitive	3	0	2	0	N/A	N/A	1	0	2	0	1	0	5	0	3	0.667	11	0	5	0	2	0	5	0
	2	90739487	A	G	intergenic	Nup160;Fnbp4	RADAR	repetitive	DARNED	REDI	repetitive	4	0.75	5	0.6	4	0	1	0	2	0	3	0	4	0	14	0	3	0	8	0	7	0	3	0
	2	90739497	A	G	intergenic	Nup160;Fnbp4	RADAR	repetitive	DARNED	REDI	repetitive	3	0.667	5	0.6	2	0	3	0	2	0	3	0	5	0	13	0.231	3	0	9	0.333	5	0	3	0
	2	90759741	A	G	intronic	Fnbp4	.	.	.	REDI	repetitive	20	0	21	0.19	16	0	9	0	14	0	23	0	35	0	12	0	26	0	17	0	37	0	31	0
	2	90769718	A	G	intronic	Fnbp4	.	.	.	REDI	repetitive	13	0.154	11	0	11	0	7	0	8	0	5	0	23	0	8	0	14	0	13	0	11	0	4	0
	2	90769719	A	G	intronic	Fnbp4	.	.	.	REDI	repetitive	13	0.154	11	0	11	0	7	0	8	0	5	0	23	0	8	0	14	0	13	0	11	0	4	0
	2	90773228	A	G	intronic	Fnbp4	RADAR	repetitive	DARNED	REDI	repetitive	7	0.571	8	0	9	0	8	0	5	0	4	0	6	0	11	0	8	0	11	0	5	0	4	0
	2	90773267	A	G	intronic	Fnbp4	.	.	.	REDI	repetitive	10	0.2	11	0	8	0	8	0	6	0	3	0	7	0	9	0	8	0	12	0	4	0	4	0
	2	90778777	A	G	intronic	Fnbp4	RADAR	repetitive	DARNED	REDI	repetitive	1	0	7	0.429	1	0	2	1	1	0	2	0	2	0	N/A	N/A	7	0	N/A	N/A	2	0	2	0
	2	90858524	A	G	intronic	Mtch2	.	.	.	REDI	repetitive	6	0.333	11	0	3	0	1	0	5	0	4	0	5	0	13	0	4	0	11	0	3	0	1	0
	2	90858525	A	G	intronic	Mtch2	.	.	.	REDI	repetitive	6	0.333	11	0	3	0	1	0	5	0	4	0	5	0	13	0	4	0	11	0	3	0	1	0
	2	90888668	A	G	intronic	C1qtnf4	.	.	.	REDI	repetitive	47	0.404	48	0.375	30	0	32	0	30	0	39	0	N/A	N/A	N/A	N/A	N/A	N/A	N/A	N/A	N/A	N/A	3	0
	2	90888670	A	G	intronic	C1qtnf4	.	.	.	REDI	repetitive	46	0.152	49	0.163	30	0	32	0	30	0	39	0	N/A	N/A	N/A	N/A	N/A	N/A	N/A	N/A	N/A	N/A	3	0
	2	90897466	T	C	intronic	Ndufs3	RADAR	repetitive	DARNED	REDI	repetitive	8	0.375	8	0.375	7	0	11	0	8	0	9	0	15	0	12	0	13	0	15	0	15	0	18	0
	2	90897479	T	C	intronic	Ndufs3	RADAR	repetitive	DARNED	REDI	repetitive	6	0.5	9	0.333	8	0	13	0	9	0	13	0	13	0	11	0	12	0	18	0	16	0	20	0
	2	90897480	T	C	intronic	Ndufs3	RADAR	repetitive	DARNED	REDI	repetitive	6	1	9	0.333	8	0	13	0	9	0	13	0	13	0	11	0	12	0	18	0	16	0	20	0
	2	90897797	T	C	intronic	Ndufs3	RADAR	repetitive	DARNED	REDI	repetitive	17	0.412	8	0.375	9	0	9	0	7	0	14	0	10	0	9	0	12	0	14	0	8	0	9	0
	2	90897812	T	C	intronic	Ndufs3	RADAR	repetitive	DARNED	REDI	repetitive	17	0.235	7	0.286	8	0	8	0	8	0	13	0	8	0	8	0	10	0	14	0	7	0	6	0
	2	90903221	A	G	intronic	Ndufs3	.	.	.	REDI	repetitive	7	0.286	17	0	13	0	17	0	22	0	26	0	25	0	29	0	20	0	19	0	27	0	25	0
	2	90907208	A	G	intronic	Kbtbd4	.	.	.	REDI	repetitive	6	0	4	0	4	0	10	0	8	0	6	0	6	0	13	0.154	9	0	17	0	18	0	15	0
	2	90918807	A	G	upstream	Ptpmt1	RADAR	repetitive	DARNED	REDI	repetitive	23	0	6	0	14	0	9	0	12	0	12	0	4	0	6	0.333	2	0	5	0	4	0	1	0
	2	90919371	A	G	intergenic	Ptpmt1;Celf1	RADAR	repetitive	DARNED	REDI	repetitive	11	0.273	17	0.176	8	0.25	4	0	9	0	9	0.222	3	0	2	0	6	0	N/A	N/A	6	0	3	0
	2	90920292	A	G	intergenic	Ptpmt1;Celf1	.	.	.	REDI	repetitive	19	0	14	0	8	0	8	0	15	0	14	0.214	2	0	2	0	6	0	4	0	6	0	5	0
	2	90920295	A	G	intergenic	Ptpmt1;Celf1	.	.	.	REDI	repetitive	19	0	14	0	8	0	8	0	15	0	14	0.214	2	0	2	0	6	0	4	0	6	0	5	0
	2	90945729	A	G	intronic	Celf1	.	.	.	REDI	repetitive	4	0.5	2	0	3	0	3	0	4	0	1	0	13	0	N/A	N/A	8	0	8	0	5	0	8	0
	2	90945730	A	G	intronic	Celf1	.	.	.	REDI	repetitive	4	0.5	2	0	3	0	3	0	4	0	1	0	13	0	N/A	N/A	8	0	8	0	5	0	8	0
	2	90945761	A	G	intronic	Celf1	.	.	.	REDI	repetitive	4	0.5	2	0	3	0	6	0	4	0	2	0	15	0	1	0	8	0	9	0	5	0	9	0
	2	90947183	A	G	intronic	Celf1	.	.	.	REDI	repetitive	1	0	N/A	N/A	7	0.286	4	0	3	0	3	0	18	0	3	0	10	0	7	0	3	0	6	0
	2	90949134	A	G	intronic	Celf1	.	.	.	REDI	repetitive	8	0	3	0	7	0.286	1	0	8	0	5	0	15	0	3	0	6	0	8	0	5	0	1	0
	2	90949950	A	G	intronic	Celf1	.	.	.	REDI	repetitive	4	0	2	0	4	0.75	N/A	N/A	3	0	2	0	1	0	6	0	14	0	24	0	4	0	6	0
	2	91015870	A	G	UTR3	Celf1	RADAR	non-repetitive	.	REDI	non-repetitive	60	0	62	0	53	0	48	0	38	0	63	0	77	0	61	0.197	75	0	97	0.196	32	0	20	0
	2	91021719	A	G	intergenic	Celf1;Rapsn	.	.	.	REDI	repetitive	5	0.4	N/A	N/A	2	0	2	0	2	0	6	0	1	0	1	0	1	0	N/A	N/A	1	0	1	0
	2	91213284	A	G	UTR3	Acp2	.	.	.	REDI	repetitive	74	0	75	0	61	0	60	0	94	0	92	0	17	0	22	0.182	17	0	28	0	18	0	18	0
	2	91213286	A	G	UTR3	Acp2	.	.	.	REDI	repetitive	77	0	75	0	65	0	65	0	94	0	95	0	17	0	21	0.238	18	0	27	0	18	0	18	0
	2	91214062	A	G	UTR3	Acp2	.	.	.	REDI	repetitive	49	0	43	0	47	0	39	0	70	0	73	0	26	0	23	0.174	20	0.2	39	0.128	29	0	11	0
	2	91214239	A	G	intronic	Ddb2	RADAR	repetitive	DARNED	REDI	repetitive	4	0	5	0	7	0.429	6	0	2	0	2	0	10	0	5	0	11	0	10	0	8	0	3	0
	2	91214283	T	C	intronic	Ddb2	RADAR	repetitive	DARNED	REDI	repetitive	4	0.5	3	0	8	0	5	0	2	0	N/A	N/A	11	0	6	0	10	0	10	0	8	0	4	0
	2	91215127	A	G	intronic	Ddb2	RADAR	repetitive	DARNED	REDI	repetitive	9	0.222	7	0	3	0	3	0	2	0	3	0	20	0	5	0	14	0	13	0	5	0	7	0
	2	91215133	A	G	intronic	Ddb2	RADAR	repetitive	DARNED	REDI	repetitive	8	0.25	6	0.333	3	0	3	0	2	0	4	0	20	0	4	0.25	14	0	13	0	5	0	7	0
	2	91215168	T	C	intronic	Ddb2	.	.	.	REDI	repetitive	6	0.5	3	0.333	1	0	3	0	3	0	5	0	21	0	6	0	14	0	15	0	7	0	7	0
	2	91215911	T	C	intronic	Ddb2	RADAR	repetitive	DARNED	REDI	repetitive	7	0.429	3	0	4	0	4	0	3	0	5	0	12	0	11	0	14	0	18	0	9	0	8	0
	2	91231873	T	C	intronic	Ddb2	.	.	.	REDI	repetitive	1	0	2	0	N/A	N/A	1	0	N/A	N/A	1	0	3	0	7	0.571	3	0	14	0	4	0	2	0
	2	91231976	T	C	intronic	Ddb2	.	.	.	REDI	repetitive	2	0	1	0	1	0	2	1	N/A	N/A	1	0	5	0	5	0	4	0	7	0	2	0	N/A	N/A
	2	91234387	T	C	intronic	Ddb2	RADAR	repetitive	DARNED	REDI	repetitive	12	0.167	9	0	7	0	7	0	6	0	5	0	25	0	59	0	31	0	74	0	22	0	14	0
	2	91234398	T	C	intronic	Ddb2	RADAR	repetitive	DARNED	REDI	repetitive	13	0.154	9	0	8	0	5	0.2	7	0	5	0	28	0	59	0	30	0	70	0	20	0	13	0
	2	91280405	A	G	intronic	1110051M20Rik	.	.	.	REDI	repetitive	2	0	2	1	N/A	N/A	1	0	4	0	1	0	N/A	N/A	N/A	N/A	N/A	N/A	N/A	N/A	2	0	N/A	N/A
	2	91299991	T	C	intronic	1110051M20Rik	RADAR	repetitive	DARNED	REDI	repetitive	4	0.5	4	0	4	0	3	0	3	0	2	0	2	0	1	0	2	0	N/A	N/A	2	0	1	0
	2	91300007	T	C	intronic	1110051M20Rik	.	.	.	REDI	repetitive	5	0	1	1	4	0	3	0	1	0	2	0	2	0	1	0	1	0	N/A	N/A	2	0	1	0
	2	91302272	T	C	intronic	1110051M20Rik	RADAR	repetitive	DARNED	REDI	repetitive	14	0.143	4	0.5	3	0	5	0	1	0	3	0	N/A	N/A	N/A	N/A	4	0	N/A	N/A	4	0	N/A	N/A
	2	91365142	T	C	intronic	1110051M20Rik	.	.	.	REDI	repetitive	2	0	1	1	3	0	3	0	2	0	N/A	N/A	1	0	2	0	2	0	2	0	3	0	2	0
	2	91365154	T	C	intronic	1110051M20Rik	.	.	.	REDI	repetitive	2	0	2	1	2	0	4	0	1	0	N/A	N/A	N/A	N/A	2	0	2	0	2	0	3	0	2	0
	2	91530077	A	G	intergenic	Lrp4;Ckap5	.	.	.	REDI	repetitive	1	0	3	0.333	3	0	1	0	7	0	6	0	7	0	1	0	N/A	N/A	6	0	11	0	10	0
	2	91545894	A	G	upstream	Ckap5	.	.	.	REDI	repetitive	5	0.4	1	0	8	0	1	0	1	0	1	0	10	0	6	0	6	0	11	0	9	0	5	0
	2	91578504	A	G	intronic	Ckap5	.	.	.	REDI	repetitive	7	0.286	4	0	1	0	3	0	7	0	7	0	21	0	10	0	10	0	20	0	22	0	5	0
	2	91578518	A	G	intronic	Ckap5	.	.	.	REDI	repetitive	7	0.857	4	0.75	1	0	3	0	7	0	6	0	13	0	6	0	8	0	17	0	19	0	5	0
	2	91579095	A	G	intronic	Ckap5	.	.	.	REDI	repetitive	7	0.571	7	0.571	9	0	2	0	12	0	12	0	23	0	18	0	7	0	15	0	35	0	18	0
	2	91579101	A	G	intronic	Ckap5	.	.	.	REDI	repetitive	7	0.571	9	0	11	0	2	0	13	0	13	0	22	0	18	0	7	0	17	0	34	0	18	0
	2	91579835	A	G	intronic	Ckap5	.	.	.	REDI	repetitive	5	0	5	0.4	7	0	7	0.286	5	0	5	0	9	0	10	0	5	0	18	0	16	0	6	0
	2	91580406	A	G	intronic	Ckap5	.	.	.	REDI	repetitive	9	0.333	5	0	9	0	7	0	7	0	4	0	11	0	15	0	9	0	18	0	16	0	6	0
	2	91601349	A	G	intronic	Ckap5	.	.	.	REDI	repetitive	8	0	7	0.286	15	0	4	0	6	0	12	0	24	0	18	0	17	0	21	0	24	0	7	0
	2	91603138	A	G	intronic	Ckap5	.	.	.	REDI	repetitive	9	0.778	4	0.75	7	0	7	0	11	0	6	0	19	0	10	0	23	0	21	0	15	0	7	0
	2	91603321	A	G	intronic	Ckap5	.	.	.	REDI	repetitive	6	0	7	0.286	10	0	3	0	10	0	7	0	23	0	18	0	30	0	13	0	15	0	9	0
	2	91722278	A	G	downstream	Harbi1	.	.	.	REDI	repetitive	6	0.667	4	1	2	0	3	0	4	0	1	0	N/A	N/A	1	0	3	0.667	3	0	5	0	1	0
	2	91734252	A	G	intronic	Ambra1	.	.	.	REDI	repetitive	6	0.833	3	0	8	0	9	0	4	0	3	0	7	0.286	3	0	14	0	10	0	5	0	9	0
	2	91734271	A	G	intronic	Ambra1	.	.	.	REDI	repetitive	8	0	6	0	6	0.333	10	0.3	4	0	2	0	7	0	6	0	13	0	9	0	9	0	5	0
	2	91734294	A	G	intronic	Ambra1	.	.	.	REDI	repetitive	7	0	7	0	5	0.4	9	0	6	0	2	0	9	0	6	0	15	0	13	0	10	0	6	0
	2	91734304	A	G	intronic	Ambra1	.	.	.	REDI	repetitive	6	0	7	0	5	0	8	0.25	6	0	3	0	9	0	7	0	15	0	13	0	10	0	5	0
	2	91869949	A	G	intronic	Ambra1	.	.	.	REDI	repetitive	N/A	N/A	1	0	2	0	1	0	1	0	N/A	N/A	4	0.25	1	0	2	0	6	0	1	0	2	0
	2	91870134	A	G	intronic	Ambra1	.	.	.	REDI	repetitive	N/A	N/A	N/A	N/A	3	0.667	N/A	N/A	1	0	2	0	5	0	4	0	6	0	8	0	1	0	2	0
	2	91895028	A	G	intronic	Ambra1	.	.	.	REDI	repetitive	8	0.25	2	0	9	0	4	0	7	0	4	0	28	0	2	0	17	0	7	0	13	0	8	0
	2	91909180	A	G	intronic	Ambra1	RADAR	repetitive	DARNED	REDI	repetitive	3	0	4	0	4	0.5	10	0	1	0	1	0	13	0	3	0	10	0	5	0	15	0	3	0
	2	92203310	A	G	intronic	Phf21a	.	.	.	REDI	repetitive	5	0	8	0	6	0.333	4	0	8	0	3	0	9	0	9	0	7	0	15	0	4	0	6	0
	2	92212379	A	G	intronic	Phf21a	.	.	.	REDI	repetitive	8	0	4	0.75	5	0	6	0	6	0	5	0	10	0	7	0	14	0	22	0	5	0	6	0
	2	92212380	A	G	intronic	Phf21a	.	.	.	REDI	repetitive	8	0	4	0.75	5	0	6	0	6	0	5	0	10	0	7	0	14	0	22	0	5	0	6	0
	2	92361143	A	G	UTR3	Phf21a	.	.	.	REDI	non-repetitive	33	0	18	0	14	0	23	0	17	0	16	0	9	0	10	0.3	7	0	18	0	5	0	3	0
	2	94175002	T	C	intergenic	Hsd17b12;Mir129-2	RADAR	repetitive	DARNED	REDI	repetitive	N/A	N/A	N/A	N/A	2	1	2	0	4	0	2	0	N/A	N/A	4	0	1	0	1	0	N/A	N/A	1	0
	2	94385042	T	C	intronic	Ttc17	.	.	.	REDI	non-repetitive	9	0	5	0	7	0.286	2	0	9	0	8	0.25	26	0	16	0	27	0	15	0	16	0	20	0
	2	96573193	A	G	intronic	Lrrc4c	.	.	.	REDI	non-repetitive	1	0	2	1	1	0	N/A	N/A	2	0	6	0	N/A	N/A	N/A	N/A	N/A	N/A	N/A	N/A	N/A	N/A	N/A	N/A
	2	96573214	A	G	intronic	Lrrc4c	.	.	.	REDI	non-repetitive	3	0.667	3	0.333	3	0	N/A	N/A	2	0	7	0	N/A	N/A	N/A	N/A	N/A	N/A	N/A	N/A	N/A	N/A	N/A	N/A
	2	96574440	A	G	intronic	Lrrc4c	.	.	.	REDI	non-repetitive	2	0.5	1	0	2	0	N/A	N/A	4	0	8	0	N/A	N/A	N/A	N/A	N/A	N/A	N/A	N/A	2	0	N/A	N/A
	2	96574445	A	G	intronic	Lrrc4c	.	.	.	REDI	non-repetitive	2	0.5	1	0	2	0	N/A	N/A	4	0	7	0	N/A	N/A	N/A	N/A	N/A	N/A	N/A	N/A	1	0	N/A	N/A
	2	96607288	A	G	intronic	Lrrc4c	RADAR	non-repetitive	DARNED	REDI	non-repetitive	N/A	N/A	1	1	N/A	N/A	1	0	6	0	6	0	N/A	N/A	N/A	N/A	N/A	N/A	N/A	N/A	N/A	N/A	1	0
	2	96607289	A	G	intronic	Lrrc4c	RADAR	non-repetitive	DARNED	REDI	non-repetitive	N/A	N/A	1	1	N/A	N/A	1	0	6	0	6	0	N/A	N/A	N/A	N/A	N/A	N/A	N/A	N/A	N/A	N/A	1	0
	2	96607299	A	G	intronic	Lrrc4c	RADAR	non-repetitive	DARNED	REDI	non-repetitive	N/A	N/A	3	0.667	N/A	N/A	1	0	8	0	6	0	N/A	N/A	N/A	N/A	N/A	N/A	N/A	N/A	N/A	N/A	2	0
	2	96621513	A	G	intronic	Lrrc4c	.	.	.	REDI	repetitive	7	0.286	5	0	3	0	2	0	3	0	3	0	N/A	N/A	N/A	N/A	N/A	N/A	N/A	N/A	N/A	N/A	N/A	N/A
	2	96628556	A	G	intronic	Lrrc4c	.	.	.	REDI	repetitive	7	0.429	7	0.571	4	0	5	0.4	6	0	5	0	N/A	N/A	N/A	N/A	N/A	N/A	N/A	N/A	N/A	N/A	N/A	N/A
	2	96628573	A	G	intronic	Lrrc4c	.	.	.	REDI	repetitive	7	0	9	0.222	5	0	3	0	6	0	6	0	N/A	N/A	N/A	N/A	N/A	N/A	N/A	N/A	N/A	N/A	N/A	N/A
	2	96628588	A	G	intronic	Lrrc4c	.	.	.	REDI	repetitive	4	0	9	0.333	3	0	1	0	6	0	4	0	N/A	N/A	N/A	N/A	N/A	N/A	N/A	N/A	N/A	N/A	N/A	N/A
	2	96628590	A	G	intronic	Lrrc4c	.	.	.	REDI	repetitive	4	0	8	0.75	3	0	1	0	5	0	4	0	N/A	N/A	N/A	N/A	N/A	N/A	N/A	N/A	N/A	N/A	N/A	N/A
	2	96696575	A	G	intronic	Lrrc4c	.	.	.	REDI	repetitive	2	0	4	0	4	0.5	N/A	N/A	4	0	3	0	N/A	N/A	N/A	N/A	N/A	N/A	N/A	N/A	N/A	N/A	N/A	N/A
	2	96696617	A	G	intronic	Lrrc4c	.	.	.	REDI	repetitive	3	0	1	0	4	0.5	N/A	N/A	3	0	3	0	N/A	N/A	N/A	N/A	N/A	N/A	N/A	N/A	N/A	N/A	N/A	N/A
	2	96778265	A	G	intronic	Lrrc4c	.	.	.	REDI	repetitive	3	0	1	1	1	0	N/A	N/A	N/A	N/A	N/A	N/A	N/A	N/A	N/A	N/A	N/A	N/A	N/A	N/A	N/A	N/A	N/A	N/A
	2	96837151	A	G	intronic	Lrrc4c	.	.	.	REDI	repetitive	4	0	3	0	5	0.4	3	0	4	0	2	0	N/A	N/A	N/A	N/A	N/A	N/A	N/A	N/A	1	0	1	0
	2	96841546	A	G	intronic	Lrrc4c	.	.	.	REDI	repetitive	3	0	4	0	4	0.5	1	0	2	0	1	0	N/A	N/A	N/A	N/A	N/A	N/A	N/A	N/A	N/A	N/A	2	0
	2	96920557	A	G	intronic	Lrrc4c	.	.	.	REDI	repetitive	2	0	6	0.667	6	0	4	0	6	0	4	0	N/A	N/A	N/A	N/A	N/A	N/A	N/A	N/A	N/A	N/A	N/A	N/A
	2	97168699	A	G	intronic	Lrrc4c	.	.	.	REDI	repetitive	3	0.667	3	0	N/A	N/A	1	0	1	0	2	0	N/A	N/A	N/A	N/A	N/A	N/A	N/A	N/A	N/A	N/A	N/A	N/A
	2	97168700	A	G	intronic	Lrrc4c	.	.	.	REDI	repetitive	3	0.667	3	0	N/A	N/A	1	0	1	0	2	0	N/A	N/A	N/A	N/A	N/A	N/A	N/A	N/A	N/A	N/A	N/A	N/A
	2	97210326	A	G	intronic	Lrrc4c	.	.	.	REDI	repetitive	2	1	5	0.4	2	0	1	0	N/A	N/A	1	0	N/A	N/A	N/A	N/A	N/A	N/A	N/A	N/A	N/A	N/A	N/A	N/A
	2	97210333	A	G	intronic	Lrrc4c	.	.	.	REDI	repetitive	3	0.667	4	0.5	2	0	1	0	N/A	N/A	1	0	N/A	N/A	N/A	N/A	N/A	N/A	N/A	N/A	N/A	N/A	N/A	N/A
	2	97292694	A	G	intronic	Lrrc4c	.	.	.	REDI	repetitive	5	0.4	N/A	N/A	3	0	N/A	N/A	N/A	N/A	2	0	N/A	N/A	N/A	N/A	N/A	N/A	N/A	N/A	2	0	N/A	N/A
	2	97292814	A	G	intronic	Lrrc4c	.	.	.	REDI	repetitive	2	1	N/A	N/A	N/A	N/A	1	0	N/A	N/A	1	0	N/A	N/A	N/A	N/A	N/A	N/A	N/A	N/A	3	0	4	0
	2	97394137	A	G	intronic	Lrrc4c	.	.	.	REDI	repetitive	2	0	3	0.667	N/A	N/A	N/A	N/A	N/A	N/A	N/A	N/A	N/A	N/A	N/A	N/A	N/A	N/A	N/A	N/A	N/A	N/A	N/A	N/A
	2	97428381	A	G	intronic	Lrrc4c	.	.	.	REDI	non-repetitive	N/A	N/A	2	1	N/A	N/A	N/A	N/A	1	0	1	0	N/A	N/A	N/A	N/A	N/A	N/A	N/A	N/A	N/A	N/A	3	0
	2	97428968	A	G	intronic	Lrrc4c	.	.	.	REDI	repetitive	6	0.5	4	0	2	0	3	0	4	0	2	0	N/A	N/A	N/A	N/A	N/A	N/A	N/A	N/A	1	0	1	0
	2	97428975	A	G	intronic	Lrrc4c	.	.	.	REDI	repetitive	6	0.5	5	0	3	0	3	0	4	0	2	0	N/A	N/A	N/A	N/A	N/A	N/A	N/A	N/A	1	0	1	0
	2	102317600	T	C	intronic	Trim44	.	.	.	REDI	non-repetitive	6	0.5	3	0.333	3	0	8	0	7	0	3	0	2	0	4	0	1	0	5	0	4	0	8	0
	2	102317609	T	C	intronic	Trim44	.	.	.	REDI	non-repetitive	6	0	3	0.333	2	0	9	0	6	0	3	0	2	0	3	0	1	0	5	0	5	0	8	0
	2	102317636	T	C	intronic	Trim44	.	.	.	REDI	non-repetitive	4	0	2	0	4	0	8	0.125	5	0	5	0	2	0	2	0	N/A	N/A	6	0	4	0	6	0
	2	102317638	T	C	intronic	Trim44	.	.	.	REDI	non-repetitive	2	0.5	2	0	4	0	10	0	5	0	5	0	2	0	1	0	N/A	N/A	6	0	4	0	7	0
	2	102317654	T	C	intronic	Trim44	.	.	.	REDI	non-repetitive	4	0	6	0	4	0	6	0.333	4	0	4	0	1	0	1	0	4	0	8	0	4	0	9	0
	2	102333619	T	C	intronic	Trim44	.	.	.	REDI	repetitive	4	0	7	0.429	5	0.4	3	0	3	0	8	0	26	0	26	0	34	0	29	0	14	0	14	0
	2	102334088	T	C	intronic	Trim44	.	.	.	REDI	repetitive	4	0	2	0	7	0.286	1	0	5	0	4	0	16	0	9	0	13	0	13	0	9	0	7	0
	2	102334094	T	C	intronic	Trim44	.	.	.	REDI	repetitive	1	1	2	0	7	0	2	0	5	0	4	0	16	0	7	0	15	0	12	0	9	0	7	0
	2	103087456	A	G	intronic	Apip	.	.	.	REDI	repetitive	8	0.625	2	0	6	0	1	0	7	0	8	0	13	0	3	0	11	0	N/A	N/A	4	0	3	0
	2	103087527	A	G	intronic	Apip	RADAR	repetitive	DARNED	REDI	repetitive	9	0	5	0	6	0.5	N/A	N/A	11	0	6	0	15	0	2	0	9	0	N/A	N/A	5	0	6	0
	2	103088294	A	G	intronic	Apip	RADAR	repetitive	DARNED	REDI	repetitive	6	0	5	0.4	3	0.667	2	0	5	0	7	0	2	0	3	0	9	0	4	0	3	0	2	0
	2	103735499	T	C	intronic	Nat10	.	.	.	REDI	repetitive	1	0	N/A	N/A	2	0	5	0.4	2	0	N/A	N/A	N/A	N/A	2	0	5	0	3	0	1	0	1	0
	2	103749687	T	C	intronic	Nat10	.	.	.	REDI	repetitive	1	0	1	0	N/A	N/A	4	0.5	4	0	3	0	1	0	4	0	1	0	N/A	N/A	3	0	1	0
	2	103749690	T	C	intronic	Nat10	.	.	.	REDI	repetitive	1	0	1	0	N/A	N/A	4	0.5	4	0	3	0	1	0	4	0	1	0	N/A	N/A	3	0	1	0
	2	103777100	T	C	intronic	Caprin1	.	.	.	REDI	repetitive	16	0.438	17	0	14	0.214	14	0.357	43	0	30	0	48	0	64	0	25	0	67	0	38	0	22	0
	2	103794565	T	C	intronic	Caprin1	.	.	.	REDI	repetitive	13	0	19	0.316	13	0	8	0	17	0	18	0	40	0	21	0	31	0	42	0	34	0	22	0
	2	104039708	A	G	intronic	Fbxo3	.	.	.	REDI	repetitive	13	0	8	0	6	0	4	0	7	0	11	0	11	0	11	0.182	14	0	9	0	30	0	13	0
	2	104039737	A	G	intronic	Fbxo3	.	.	.	REDI	repetitive	11	0.455	11	0.273	8	0	9	0	13	0	15	0	18	0	10	0	19	0	19	0	35	0	21	0
	2	104243023	T	C	intronic	D430041D05Rik	.	.	.	REDI	repetitive	9	0	3	0	5	0	5	0.4	3	0	2	0	N/A	N/A	N/A	N/A	1	0	N/A	N/A	N/A	N/A	2	0
	2	104243024	T	C	intronic	D430041D05Rik	.	.	.	REDI	repetitive	9	0.444	3	0	5	0	5	0	3	0	2	0	N/A	N/A	N/A	N/A	1	0	N/A	N/A	N/A	N/A	2	0
	2	104243047	T	C	intronic	D430041D05Rik	.	.	.	REDI	repetitive	12	0.333	4	0	5	0.4	5	0.4	5	0	3	0	N/A	N/A	N/A	N/A	1	0	N/A	N/A	N/A	N/A	2	0
	2	104243070	T	C	intronic	D430041D05Rik	.	.	.	REDI	repetitive	9	0.333	7	0	5	0	4	0	4	0	3	0	N/A	N/A	N/A	N/A	1	0	N/A	N/A	N/A	N/A	2	0
	2	104245092	T	C	intronic	D430041D05Rik	.	.	.	REDI	repetitive	5	0.2	2	0	4	0	2	0	5	0	2	0	2	0	N/A	N/A	2	0	N/A	N/A	N/A	N/A	N/A	N/A
	2	104245115	T	C	intronic	D430041D05Rik	.	.	.	REDI	repetitive	8	0.375	5	0	5	0	3	0	4	0	2	0	2	0	N/A	N/A	2	0	N/A	N/A	N/A	N/A	N/A	N/A
	2	104398272	T	C	intronic	D430041D05Rik	.	.	.	REDI	repetitive	5	0.4	4	0	6	0	1	0	5	0	4	0	8	0	1	0	2	0	N/A	N/A	N/A	N/A	N/A	N/A
	2	104398310	T	C	intronic	D430041D05Rik	.	.	.	REDI	repetitive	3	0.667	2	0	3	0	2	0	3	0	4	0	6	0	2	0	3	0	N/A	N/A	N/A	N/A	N/A	N/A
	2	104398315	T	C	intronic	D430041D05Rik	.	.	.	REDI	repetitive	3	0.667	2	0	3	0	2	0	2	0	4	0	5	0	2	0	2	0	N/A	N/A	N/A	N/A	N/A	N/A
	2	104437287	T	C	intronic	Hipk3	.	.	.	REDI	repetitive	14	0	5	0	8	0.375	9	0	23	0	22	0	13	0	9	0	18	0	15	0	23	0	13	0
	2	104567983	A	G	ncRNA_exonic	Platr14	.	.	.	REDI	repetitive	6	0.5	3	0	7	0	3	0	1	0	16	0	N/A	N/A	1	0	N/A	N/A	1	0	N/A	N/A	3	0
	2	104621130	A	G	intronic	Cstf3	.	.	.	REDI	repetitive	4	0	5	0.4	5	0	8	0	7	0	6	0	11	0	16	0	14	0	24	0	11	0	3	0
	2	104656043	T	C	intronic	Cstf3	.	.	.	REDI	repetitive	3	0	5	0.4	1	0	3	0	N/A	N/A	1	0	9	0	1	0	3	0	3	0	1	0	2	0
	2	104658346	A	G	intronic	Cstf3	.	.	.	REDI	repetitive	2	0	3	0	3	0	5	0	4	0	9	0	7	0	7	0.286	6	0	5	0	4	0	3	0
	2	104658997	T	C	intronic	Cstf3	RADAR	repetitive	DARNED	REDI	repetitive	21	0	11	0	21	0	9	0.333	23	0	6	0	9	0	5	0	11	0	8	0	5	0	7	0
	2	104662917	T	C	intronic	Cstf3	RADAR	repetitive	DARNED	REDI	repetitive	7	0.286	18	0	14	0	14	0	14	0	20	0	12	0	5	0	8	0	11	0	6	0	11	0
	2	104666245	T	C	downstream	Cstf3	RADAR	repetitive	DARNED	REDI	repetitive	9	0	10	0.2	19	0	6	0	3	0	3	0	N/A	N/A	N/A	N/A	1	0	1	0	N/A	N/A	3	0
	2	104667154	T	C	intergenic	Cstf3;Tcp11l1	RADAR	repetitive	DARNED	REDI	repetitive	8	0.875	9	0	8	0.375	10	0	7	0	9	0	N/A	N/A	2	0	N/A	N/A	1	0	3	0	1	0
	2	104667159	T	C	intergenic	Cstf3;Tcp11l1	RADAR	repetitive	DARNED	REDI	repetitive	8	0.875	8	0.375	9	0	10	0	7	0	9	0	N/A	N/A	2	0	N/A	N/A	1	0	3	0	1	0
	2	104667160	T	C	intergenic	Cstf3;Tcp11l1	RADAR	repetitive	DARNED	REDI	repetitive	11	0.273	10	0	9	0	10	0	7	0	9	0	N/A	N/A	2	0	N/A	N/A	1	0	3	0	1	0
	2	104667596	T	C	intergenic	Cstf3;Tcp11l1	.	.	.	REDI	repetitive	36	0	22	0	42	0	22	0	15	0	18	0	2	1	1	0	3	0	1	0	1	0	2	0
	2	104667598	T	C	intergenic	Cstf3;Tcp11l1	RADAR	repetitive	DARNED	REDI	repetitive	36	0	22	0	43	0	22	0	16	0	19	0	2	1	1	0	3	0	1	0	1	0	2	0
	2	104668299	T	C	intergenic	Cstf3;Tcp11l1	RADAR	repetitive	DARNED	REDI	repetitive	23	0.261	22	0.182	31	0	25	0	23	0	10	0	1	0	N/A	N/A	1	0	3	0	4	0	2	0
	2	104669953	T	C	intergenic	Cstf3;Tcp11l1	RADAR	repetitive	DARNED	REDI	repetitive	28	0.25	20	0.2	28	0	9	0	16	0	15	0	N/A	N/A	4	0	N/A	N/A	6	0	2	0	3	0
	2	104670099	T	C	intergenic	Cstf3;Tcp11l1	.	.	.	REDI	repetitive	17	0	21	0	36	0	10	0	15	0	13	0	N/A	N/A	3	0	2	0	6	0.333	1	0	3	0
	2	104676680	T	C	intergenic	Cstf3;Tcp11l1	.	.	.	REDI	repetitive	1	0	2	1	1	0	3	0	1	0	3	0	N/A	N/A	N/A	N/A	1	0	1	0	N/A	N/A	N/A	N/A
	2	104680772	T	C	UTR3	Tcp11l1	RADAR	repetitive	DARNED	REDI	repetitive	27	0.296	14	0.429	19	0	10	0	16	0	10	0	1	0	N/A	N/A	2	0	1	1	1	0	3	0
	2	104681085	T	C	UTR3	Tcp11l1	RADAR	repetitive	DARNED	REDI	repetitive	14	0.143	12	0	14	0	10	0	11	0	6	0	1	0	N/A	N/A	N/A	N/A	1	0	N/A	N/A	N/A	N/A
	2	104693836	T	C	intronic	Tcp11l1	.	.	.	REDI	repetitive	5	0.4	1	0	5	0	1	0	2	0	1	0	1	0	N/A	N/A	N/A	N/A	N/A	N/A	3	0	4	0
	2	104693837	T	C	intronic	Tcp11l1	.	.	.	REDI	repetitive	5	0.4	1	0	5	0	1	0	2	0	1	0	1	0	N/A	N/A	N/A	N/A	N/A	N/A	3	0	4	0
	2	104702884	T	C	intronic	Tcp11l1	.	.	.	REDI	repetitive	3	0	3	0	1	0	6	0.5	N/A	N/A	1	0	N/A	N/A	N/A	N/A	N/A	N/A	N/A	N/A	N/A	N/A	1	0
	2	104759938	T	C	intronic	Qser1	.	.	.	REDI	repetitive	6	0.5	4	0	3	0	2	0	4	0	4	0	1	0	1	0	3	0	5	0	2	0	2	0
	2	104760301	T	C	intronic	Qser1	.	.	.	REDI	repetitive	3	0	7	0	1	0	7	0.286	5	0	3	0	3	0	4	0	7	0	5	0	2	0	2	0
	2	104761797	T	C	intronic	Qser1	.	.	.	REDI	repetitive	7	0	7	0.429	3	0	9	0	8	0	6	0	4	0	N/A	N/A	4	0	5	0	4	0	2	0
	2	104770582	T	C	intronic	Qser1	.	.	.	REDI	repetitive	9	0	15	0	2	0	8	0	10	0	10	0	24	0	8	0.375	10	0	14	0	11	0	6	0
	2	104829469	T	C	intergenic	Qser1;Prrg4	.	.	.	REDI	repetitive	4	0	N/A	N/A	3	0.333	3	0.667	6	0	5	0	6	0	5	0	4	0	3	0	13	0	2	0
	2	104829499	T	C	intergenic	Qser1;Prrg4	.	.	.	REDI	repetitive	4	0	N/A	N/A	5	0.4	6	0	5	0	5	0	8	0	4	0	6	0	5	0	11	0	4	0
	2	104830332	T	C	downstream	Prrg4	.	.	.	REDI	repetitive	6	0	4	0	7	0	8	0.25	6	0	9	0	33	0	13	0.308	44	0.182	28	0.143	42	0	23	0
	2	104830351	T	C	downstream	Prrg4	.	.	.	REDI	repetitive	6	0	4	0	8	0.375	8	0	6	0	10	0	36	0	12	0	41	0.146	25	0	45	0	20	0
	2	104831379	T	C	UTR3	Prrg4	.	.	.	REDI	repetitive	2	0	6	0	2	0	3	0	1	0	8	0	22	0	14	0	16	0	14	0.143	31	0	13	0
	2	104831396	T	C	UTR3	Prrg4	.	.	.	REDI	repetitive	3	0	6	0	2	0	2	0	3	0	10	0	20	0	15	0	18	0	15	0.2	30	0	13	0
	2	104831412	T	C	UTR3	Prrg4	.	.	.	REDI	repetitive	3	0	8	0	5	0	2	0	3	0	11	0	23	0	19	0	20	0	18	0.167	37	0	18	0
	2	104995953	T	C	intronic	Ccdc73	.	.	.	REDI	repetitive	17	0	23	0.13	17	0	18	0	33	0	21	0	8	0	1	0	5	0	5	0	8	0	8	0
	2	104996843	T	C	intronic	Ccdc73	RADAR	repetitive	DARNED	REDI	repetitive	43	0.14	16	0.188	20	0	28	0	26	0	19	0	10	0	9	0	18	0	11	0	9	0	7	0
	2	104996849	T	C	intronic	Ccdc73	RADAR	repetitive	DARNED	REDI	repetitive	42	0.571	17	0.294	18	0.444	26	0.577	26	0	19	0	12	0	11	0	17	0	12	0	9	0	7	0
	2	104996909	T	C	intronic	Ccdc73	RADAR	repetitive	DARNED	REDI	repetitive	27	0	18	0	14	0	26	0	28	0	26	0	11	0	8	0	20	0	4	0	17	0	11	0.364
	2	104996926	T	C	intronic	Ccdc73	RADAR	repetitive	DARNED	REDI	repetitive	29	0	17	0.235	17	0	31	0	32	0	25	0	12	0	9	0	19	0	6	0	17	0	13	0
	2	104996928	T	C	intronic	Ccdc73	.	.	.	REDI	repetitive	28	0.857	17	0.882	17	0	31	0	31	0	24	0	12	0	9	0.333	19	0	6	0	17	0	14	0.286
	2	104997889	T	C	intronic	Ccdc73	.	.	.	REDI	repetitive	20	0.2	14	0.5	11	0	14	0	24	0	23	0	2	0	4	0	4	0	9	0	13	0	7	0
	2	105784045	T	C	intronic	Elp4	.	.	.	REDI	non-repetitive	2	0	5	0.4	4	0	3	0	1	0	2	0	12	0	22	0	18	0	20	0	11	0	8	0
	2	105881712	T	C	intronic	Elp4	.	.	.	REDI	repetitive	4	0.5	N/A	N/A	1	0	N/A	N/A	5	0	N/A	N/A	4	0	N/A	N/A	1	0	4	0	4	0	5	0
	2	105961776	T	C	intronic	Immp1l	RADAR	repetitive	DARNED	REDI	repetitive	13	0.231	7	0	16	0	3	0	12	0	8	0	21	0	13	0	15	0	24	0	9	0	11	0
	2	105990328	T	C	intronic	Dnajc24	.	.	.	REDI	repetitive	1	0	2	1	1	0	5	0	4	0	1	0	6	0	3	0	6	0	6	0	9	0	6	0
	2	105991734	T	C	intronic	Dnajc24	.	.	.	REDI	repetitive	2	0	1	0	1	0	2	1	2	0	1	0	14	0	1	0	5	0	7	0	5	0	9	0
	2	106963428	T	C	UTR3	Arl14ep	.	.	.	REDI	non-repetitive	37	0	51	0	35	0	35	0	46	0	44	0	37	0	62	0.161	44	0	71	0	39	0	24	0
	2	110728483	T	C	intronic	Ano3;Muc15	.	.	.	REDI	repetitive	1	0	1	0	N/A	N/A	2	1	N/A	N/A	N/A	N/A	N/A	N/A	N/A	N/A	N/A	N/A	N/A	N/A	N/A	N/A	N/A	N/A
	2	110862241	T	C	intronic	Ano3	.	.	.	REDI	repetitive	N/A	N/A	2	1	N/A	N/A	N/A	N/A	1	0	N/A	N/A	N/A	N/A	N/A	N/A	N/A	N/A	N/A	N/A	N/A	N/A	N/A	N/A
	2	112346458	A	G	intronic	Slc12a6	.	.	.	REDI	repetitive	2	1	1	0	2	0.5	6	0	3	0	2	0	25	0	9	0	11	0	8	0	9	0	7	0
	2	112346460	A	G	intronic	Slc12a6	.	.	.	REDI	repetitive	2	1	1	0	3	0	6	0	3	0	2	0	25	0	9	0	11	0	8	0	9	0	7	0
	2	112346718	A	G	intronic	Slc12a6	.	.	.	REDI	repetitive	2	0	5	0.4	1	0	1	0	3	0	2	0	4	0	4	0	14	0	7	0	10	0	5	0
	2	112355501	A	G	intronic	Slc12a6	RADAR	repetitive	DARNED	REDI	repetitive	12	0.5	14	0.571	12	0	12	0	9	0	6	0	22	0	3	0	22	0	13	0	20	0	11	0
	2	112355507	A	G	intronic	Slc12a6	RADAR	repetitive	DARNED	REDI	repetitive	13	0.462	13	0.154	12	0	12	0	8	0	6	0	22	0	3	0	22	0	12	0	20	0	14	0
	2	112355863	A	G	intronic	Slc12a6	.	.	.	REDI	repetitive	7	0.714	14	0.5	8	0	12	0	10	0	8	0	18	0	7	0	15	0	12	0	24	0	17	0
	2	112385744	A	G	intronic	Katnbl1	.	.	.	REDI	repetitive	1	0	7	0	5	0.4	3	0	6	0	5	0	22	0	24	0	7	0	14	0	5	0	9	0
	2	112385881	A	G	intronic	Katnbl1	.	.	.	REDI	repetitive	7	0	2	1	2	0	5	0	5	0	3	0	25	0	14	0	15	0	12	0	5	0	6	0
	2	112385889	A	G	intronic	Katnbl1	.	.	.	REDI	repetitive	7	0	2	1	2	0	4	0	5	0	2	0	25	0	11	0	15	0	11	0	5	0	5	0
	2	112386015	A	G	intronic	Katnbl1	.	.	.	REDI	repetitive	5	0.6	5	0	4	0	2	0	6	0	5	0	16	0	14	0	11	0	7	0	5	0	7	0
	2	112386059	A	G	intronic	Katnbl1	.	.	.	REDI	repetitive	5	0	8	0.25	4	0	6	0	9	0	7	0	23	0	14	0	13	0	11	0	10	0	9	0
	2	112462359	A	G	intronic	Emc7	.	.	.	REDI	repetitive	3	0	5	0.6	8	0	2	0	7	0	5	0	5	0	5	0	4	0	13	0	7	0	6	0
	2	112734644	T	C	intronic	Ryr3	.	.	.	REDI	repetitive	3	0	2	1	3	0	1	0	1	0	1	0	1	0	N/A	N/A	N/A	N/A	N/A	N/A	N/A	N/A	N/A	N/A
	2	112769409	T	C	intronic	Ryr3	.	.	.	REDI	repetitive	1	0	2	0	1	0	2	1	6	0	3	0	N/A	N/A	N/A	N/A	N/A	N/A	N/A	N/A	N/A	N/A	N/A	N/A
	2	112769417	T	C	intronic	Ryr3	.	.	.	REDI	repetitive	1	0	1	0	2	0	2	0.5	6	0	4	0	N/A	N/A	N/A	N/A	N/A	N/A	N/A	N/A	N/A	N/A	N/A	N/A
	2	112770420	T	C	intronic	Ryr3	.	.	.	REDI	repetitive	2	1	2	0.5	2	0	1	0	N/A	N/A	1	0	N/A	N/A	N/A	N/A	N/A	N/A	N/A	N/A	N/A	N/A	1	0
	2	112874140	T	C	intronic	Ryr3	.	.	.	REDI	repetitive	2	1	1	0	N/A	N/A	2	0	N/A	N/A	2	0	N/A	N/A	N/A	N/A	N/A	N/A	N/A	N/A	N/A	N/A	N/A	N/A
	2	114533838	T	C	intronic	Dph6	.	.	.	REDI	repetitive	1	0	1	1	3	0	3	0	1	0	3	0	1	0	3	0.667	2	0	4	0	2	0	N/A	N/A
	2	114578235	T	C	intronic	Dph6	.	.	.	REDI	repetitive	N/A	N/A	N/A	N/A	2	1	1	0	1	0	N/A	N/A	2	0	1	0	N/A	N/A	2	0	1	0	3	0
	2	116013884	T	C	intronic	Meis2	.	.	.	REDI	repetitive	10	0	12	0.167	8	0	8	0	10	0	2	0	7	0	N/A	N/A	6	0	N/A	N/A	3	0	N/A	N/A
	2	116031178	T	C	intronic	Meis2	.	.	.	REDI	non-repetitive	5	0	11	0.182	7	0	12	0	13	0	16	0	2	0	2	0	5	0	1	0	4	0	2	0
	2	116031206	T	C	intronic	Meis2	.	.	.	REDI	non-repetitive	5	0	9	0.333	11	0	9	0	15	0	14	0	2	0	3	0	3	0	1	0	3	0	3	0
	2	118459526	A	G	intronic	Eif2ak4	.	.	.	REDI	repetitive	1	0	N/A	N/A	N/A	N/A	2	1	N/A	N/A	1	0	2	0	N/A	N/A	3	0	N/A	N/A	4	0	2	0
	2	118459544	A	G	intronic	Eif2ak4	.	.	.	REDI	repetitive	2	0	N/A	N/A	N/A	N/A	2	1	N/A	N/A	2	0	1	0	N/A	N/A	3	0	N/A	N/A	5	0	1	0
	2	118685668	A	G	intronic	Pak6	.	.	.	REDI	repetitive	N/A	N/A	3	0.667	N/A	N/A	3	0	2	0	N/A	N/A	N/A	N/A	N/A	N/A	N/A	N/A	N/A	N/A	2	0	5	0
	2	118685669	A	G	intronic	Pak6	.	.	.	REDI	repetitive	N/A	N/A	3	0.667	N/A	N/A	3	0	1	0	N/A	N/A	N/A	N/A	N/A	N/A	N/A	N/A	N/A	N/A	2	0	5	0
	2	118685674	A	G	intronic	Pak6	.	.	.	REDI	repetitive	N/A	N/A	3	0.667	N/A	N/A	3	0	1	0	N/A	N/A	N/A	N/A	N/A	N/A	N/A	N/A	N/A	N/A	2	0	5	0
	2	118869896	A	G	intronic	Ivd	.	.	.	REDI	repetitive	14	0.143	13	0	9	0	11	0	11	0	18	0	12	0	17	0	22	0	20	0	22	0	6	0
	2	118869918	A	G	intronic	Ivd	RADAR	repetitive	DARNED	REDI	repetitive	15	0	15	0.2	13	0.231	15	0	10	0	19	0	12	0	14	0	21	0	19	0	22	0	7	0
	2	118869924	A	G	intronic	Ivd	RADAR	repetitive	DARNED	REDI	repetitive	14	0	13	0	13	0.231	14	0	10	0	21	0	14	0	16	0	20	0	18	0	21	0	7	0
	2	118869941	A	G	intronic	Ivd	RADAR	repetitive	DARNED	REDI	repetitive	10	0.2	13	0.308	13	0.615	11	0.182	12	0	22	0	13	0	15	0	16	0	18	0	21	0	6	0
	2	118869942	A	G	intronic	Ivd	RADAR	repetitive	DARNED	REDI	repetitive	11	0	13	0.154	13	0.615	11	0.182	12	0	22	0	13	0	15	0	16	0	18	0	21	0	6	0
	2	118870253	A	G	intronic	Ivd	.	.	.	REDI	repetitive	7	0	13	0	17	0	11	0.182	11	0	11	0	18	0	6	0	7	0	13	0	7	0	9	0
	2	119104343	A	G	downstream	Knl1	.	.	.	REDI	repetitive	2	0	N/A	N/A	3	0	N/A	N/A	5	0	2	0	23	0.174	58	0.207	37	0.27	73	0.342	60	0.283	27	0
	2	119104455	A	G	downstream	Knl1	.	.	.	REDI	repetitive	1	0	2	0	9	0	2	0	2	0	8	0	47	0	74	0	30	0.167	114	0	61	0.197	27	0
	2	119104882	A	G	downstream	Knl1	.	.	.	REDI	repetitive	N/A	N/A	N/A	N/A	1	0	1	0	N/A	N/A	N/A	N/A	17	0	27	0.148	12	0	35	0.486	17	0.235	9	0
	2	119104953	A	G	downstream	Knl1	.	.	.	REDI	repetitive	2	0	N/A	N/A	3	0	2	0	1	0	N/A	N/A	28	0	33	0.273	32	0.219	38	0.237	42	0	14	0
	2	119104955	A	G	downstream	Knl1	.	.	.	REDI	repetitive	2	0	N/A	N/A	3	0	2	0	1	0	N/A	N/A	28	0	32	0.125	31	0	40	0	41	0	14	0
	2	119105608	A	G	intergenic	Knl1;Rad51	.	.	.	REDI	repetitive	2	0	1	0	1	0	2	0	2	0	2	0	28	0	19	0.211	27	0	24	0	29	0	13	0
	2	119138900	T	C	intronic	Rmdn3	.	.	.	REDI	repetitive	6	0	5	0	7	0	8	0	17	0	11	0	9	0	5	0	7	0.286	4	0	18	0	7	0
	2	119145118	T	C	intronic	Rmdn3	.	.	.	REDI	repetitive	7	0.286	1	0	3	0	2	0	2	0	3	0	4	0	N/A	N/A	2	0	7	0	3	0	3	0
	2	119418976	T	C	intronic	Ino80	.	.	.	REDI	repetitive	5	0	6	0.333	2	0	5	0	3	0	3	0	14	0	2	0	20	0	8	0	6	0	7	0
	2	119470330	T	C	intronic	Ino80	.	.	.	REDI	repetitive	3	0.667	2	0	3	0	1	0	1	0	3	0	9	0	6	0	3	0	9	0	4	0	3	0
	2	119470369	T	C	intronic	Ino80	.	.	.	REDI	repetitive	3	0	2	0	2	0	2	1	2	0	1	0	6	0	8	0	3	0	10	0	3	0	3	0
	2	119610052	T	C	UTR3	Oip5	.	.	.	REDI	repetitive	5	0	4	0	12	0	12	0	12	0	16	0	33	0	25	0	39	0.154	39	0	59	0	20	0
	2	119610081	T	C	UTR3	Oip5	RADAR	repetitive	.	REDI	repetitive	5	0	8	0	11	0	9	0	17	0	15	0	32	0	23	0	38	0.237	44	0	49	0.265	19	0
	2	119610083	T	C	UTR3	Oip5	RADAR	repetitive	.	REDI	repetitive	4	0	8	0	11	0	10	0	17	0	15	0	31	0	23	0	35	0.314	44	0	47	0.277	18	0
	2	119647857	T	C	intronic	Nusap1	RADAR	repetitive	DARNED	REDI	repetitive	4	1	1	0	6	1	N/A	N/A	6	0	4	0	5	0	2	0	2	0	5	0.4	2	0	1	0
	2	119647871	T	C	intronic	Nusap1	RADAR	repetitive	DARNED	REDI	repetitive	4	0	1	0	6	0.333	N/A	N/A	7	0	3	0	5	0	2	0	2	0	5	0	2	0	2	0
	2	119647885	T	C	intronic	Nusap1	RADAR	repetitive	DARNED	REDI	repetitive	2	1	1	0	4	0	2	0	6	0	3	0	5	0	2	0	2	0	5	0	3	0	3	0
	2	119648578	T	C	intronic	Nusap1	.	.	.	REDI	repetitive	2	1	9	0.222	N/A	N/A	3	0	3	0	2	0	N/A	N/A	3	0	2	0	6	0	8	0	2	0
	2	119653342	T	C	intergenic	Nusap1;Ndufaf1	RADAR	repetitive	DARNED	REDI	repetitive	10	0	9	0.444	4	0	9	0	4	0	8	0	4	0	2	0	3	0	1	0	2	0	1	0
	2	119658081	T	C	intronic	Ndufaf1	RADAR	repetitive	DARNED	REDI	repetitive	4	0	2	0	3	0	5	0.4	11	0	9	0	3	0	1	0	4	0	5	0	3	0	1	0
	2	119658086	T	C	intronic	Ndufaf1	.	.	.	REDI	repetitive	4	0.5	2	0	3	0	3	0	9	0	9	0	3	0	1	0	3	0	4	0	2	0	1	0
	2	119706959	A	G	intronic	Rtf1	.	.	.	REDI	repetitive	4	0	6	0.5	5	0	2	0	9	0	9	0	10	0	9	0	3	0	6	0	2	0	9	0
	2	119723405	A	G	intronic	Rtf1	.	.	.	REDI	repetitive	3	0.667	1	0	N/A	N/A	N/A	N/A	5	0	7	0	8	0	2	0	7	0	4	0	3	0	3	0
	2	119922146	A	G	intronic	Mga	.	.	.	REDI	repetitive	4	0.5	4	0	4	0	4	0	2	0	7	0	8	0	4	0	4	0	8	0	10	0	5	0
	2	119924935	A	G	intronic	Mga	.	.	.	REDI	repetitive	6	0	4	0.5	N/A	N/A	2	0	3	0	2	0	13	0	12	0	8	0	14	0	9	0	3	0
	2	119940443	A	G	intronic	Mga	.	.	.	REDI	repetitive	4	0	3	0.667	2	0	5	0	2	0	2	0	6	0	2	0	8	0	8	0	10	0	1	0
	2	119940444	A	G	intronic	Mga	.	.	.	REDI	repetitive	4	0	3	0.667	2	0	5	0	2	0	2	0	6	0	2	0	8	0	8	0	10	0	1	0
	2	120396570	T	C	intronic	Tmem87a	.	.	.	REDI	repetitive	5	0.4	5	0	3	0	2	0	6	0	9	0	39	0	12	0	47	0	29	0	70	0	74	0
	2	120398174	T	C	intronic	Tmem87a	.	.	.	REDI	repetitive	1	0	7	0.286	4	0	3	0	9	0	5	0	28	0	12	0	22	0	13	0	32	0	20	0
	2	120558754	T	C	intronic	Zfp106	.	.	.	REDI	repetitive	6	0	1	0	1	0	2	1	2	0	1	0	6	0	5	0	5	0	6	0	3	0	4	0
	2	120568754	A	G	intronic	Snap23	.	.	.	REDI	repetitive	N/A	N/A	N/A	N/A	3	0.667	2	0	1	0	N/A	N/A	1	0	1	0	3	0	2	0	3	0	8	0
	2	120594529	A	G	intronic	Snap23	.	.	.	REDI	repetitive	1	0	5	0.4	3	0	4	0	3	0	2	0	7	0	6	0	8	0	10	0	7	0	9	0
	2	120600911	A	G	downstream	Snap23	.	.	.	REDI	repetitive	6	0	6	0	7	0	5	0	5	0	6	0	10	0	8	0	18	0	10	0	10	0.2	8	0
	2	120600920	A	G	downstream	Snap23	.	.	.	REDI	repetitive	5	0	7	0	9	0	5	0	5	0	5	0	8	0	7	0	18	0	11	0	10	0.2	9	0
	2	120600926	A	G	downstream	Snap23	.	.	.	REDI	repetitive	7	0	7	0	11	0	6	0.333	5	0	6	0	7	0	7	0	19	0	14	0	14	0	10	0
	2	120601792	A	G	intergenic	Snap23;Lrrc57	.	.	.	REDI	repetitive	9	0.333	3	0	7	0	3	0	5	0	1	0	15	0.267	4	0	20	0	11	0.273	9	0	9	0
	2	120601795	A	G	intergenic	Snap23;Lrrc57	.	.	.	REDI	repetitive	9	0	3	0	7	0	4	0	6	0	1	0	14	0.143	4	0	21	0	13	0	9	0	8	0
	2	120601866	A	G	intergenic	Snap23;Lrrc57	.	.	.	REDI	repetitive	7	0	4	0	8	0	7	0	9	0	3	0	19	0.211	4	0.5	15	0.133	8	0.375	6	0.5	4	0
	2	120602217	A	G	intergenic	Snap23;Lrrc57	.	.	.	REDI	repetitive	11	0	7	0	12	0	18	0	6	0	2	0	17	0	3	0	9	0.333	4	0	20	0	8	0
	2	120620269	A	G	UTR3	Haus2	.	.	.	REDI	repetitive	62	0	56	0	48	0	65	0	76	0	62	0	35	0.2	30	0.2	23	0.174	42	0.214	45	0.156	22	0.273
	2	120621168	A	G	UTR3	Haus2	.	.	.	REDI	repetitive	56	0.232	72	0.153	59	0	46	0	49	0	51	0	24	0	19	0.368	20	0.2	34	0	35	0	18	0
	2	120692266	A	G	intergenic	Haus2;Cdan1	.	.	.	REDI	repetitive	2	1	2	0	3	0	2	0	2	0	1	0	1	0	1	0	2	0	N/A	N/A	2	0	1	0
	2	120692289	A	G	intergenic	Haus2;Cdan1	.	.	.	REDI	repetitive	3	1	2	1	3	0	2	0	2	0	2	0	1	0	1	0	2	0	N/A	N/A	3	0	1	0
	2	120707743	A	G	intergenic	Haus2;Cdan1	.	.	.	REDI	repetitive	4	0	2	1	1	0	1	0	N/A	N/A	N/A	N/A	6	0	1	0	2	0	1	0	5	0	1	0
	2	120733777	T	C	UTR3	Ttbk2	RADAR	repetitive	DARNED	REDI	repetitive	113	0.265	90	0.344	85	0	53	0.226	96	0	72	0	17	0	22	0.182	23	0.217	30	0.233	25	0	20	0
	2	120733821	T	C	UTR3	Ttbk2	RADAR	repetitive	DARNED	REDI	repetitive	134	0.493	103	0.456	117	0	82	0	110	0	88	0	16	0.188	33	0.303	24	0.25	39	0.154	31	0	22	0.227
	2	120736952	T	C	UTR3	Ttbk2	RADAR	repetitive	DARNED	REDI	repetitive	138	0.21	106	0.208	95	0.337	66	0.303	120	0	137	0	33	0	30	0	35	0	47	0	22	0	16	0
	2	120736975	T	C	UTR3	Ttbk2	RADAR	repetitive	DARNED	REDI	repetitive	150	0.293	114	0.386	101	0.277	71	0.296	133	0	138	0	35	0.257	25	0.28	41	0	54	0	29	0	15	0.267
	2	120737001	T	C	UTR3	Ttbk2	RADAR	repetitive	DARNED	REDI	repetitive	141	0.291	110	0.273	115	0	90	0	129	0	147	0	44	0.159	34	0.206	40	0	63	0	23	0	15	0.2
	2	120748332	T	C	intronic	Ttbk2	.	.	.	REDI	repetitive	3	0	3	0	1	0	2	1	2	0	1	0	3	0	1	0	2	0	2	0	1	0	2	0
	2	120762911	T	C	intronic	Ttbk2	.	.	.	REDI	repetitive	6	0.667	4	0	2	0	3	0	1	0	5	0	4	0	N/A	N/A	6	0	5	0	16	0	1	0
	2	120762912	T	C	intronic	Ttbk2	RADAR	repetitive	.	REDI	repetitive	6	0.667	4	0	2	0	3	0	1	0	5	0	4	0	N/A	N/A	6	0	5	0	16	0	1	0
	2	120763304	T	C	intronic	Ttbk2	.	.	.	REDI	repetitive	9	0.556	3	0	8	0	3	0	6	0	3	0	7	0	4	0	10	0	4	0	7	0	6	0
	2	120782144	T	C	intronic	Ttbk2	RADAR	repetitive	DARNED	REDI	repetitive	N/A	N/A	3	0.667	2	0	3	0	3	0	3	0	5	0	4	0	2	0	7	0	3	0	N/A	N/A
	2	121221556	T	C	intronic	Trp53bp1	.	.	.	REDI	repetitive	12	0	10	0.2	9	0	4	0	15	0	9	0	8	0	7	0	7	0	18	0	3	0	2	0
	2	121249238	T	C	intronic	Trp53bp1	.	.	.	REDI	repetitive	13	0	8	0	7	0.286	13	0	10	0	8	0	15	0	5	0	4	0	9	0	6	0	4	0
	2	121408382	T	C	intronic	Catsper2	.	.	.	REDI	repetitive	2	0	2	0	3	1	1	0	N/A	N/A	1	0	1	0	4	0	1	0	N/A	N/A	1	0	N/A	N/A
	2	121409121	T	C	intronic	Catsper2	.	.	.	REDI	repetitive	2	1	1	1	4	0	N/A	N/A	1	0	2	0	N/A	N/A	2	0	4	0	2	0	1	0	1	0
	2	121416521	A	G	intronic	Pdia3	.	.	.	REDI	repetitive	1	0	3	0	3	0	8	0	4	0	1	0	5	0	5	0	6	0	9	0.222	8	0	2	0
	2	121490783	T	C	intergenic	Mfap1b;Mfap1a	.	.	.	REDI	repetitive	11	0	18	0	9	0	11	0	17	0	12	0	6	0	16	0	8	0	25	0	20	0	8	0.25
	2	121490875	T	C	intergenic	Mfap1b;Mfap1a	.	.	.	REDI	repetitive	17	0	25	0	19	0	17	0	20	0	18	0	15	0	9	0.222	8	0	19	0	22	0	9	0
	2	121492422	T	C	downstream	Mfap1a	.	.	.	REDI	repetitive	29	0	41	0	26	0	23	0	35	0	34	0	47	0	28	0.179	59	0.186	55	0.145	35	0	29	0.172
	2	121492869	T	C	UTR3	Mfap1a	.	.	.	REDI	repetitive	56	0	48	0	48	0	45	0	51	0	59	0	66	0	44	0.136	46	0	87	0.23	74	0	35	0.257
	2	121492885	T	C	UTR3	Mfap1a	.	.	.	REDI	repetitive	51	0	45	0	48	0	44	0	49	0	59	0	61	0	35	0.171	46	0.239	80	0.2	70	0.129	32	0.125
	2	121493245	T	C	UTR3	Mfap1a	.	.	.	REDI	repetitive	35	0	43	0	60	0	34	0	73	0	90	0	88	0.193	61	0.23	55	0.309	122	0.23	103	0.233	69	0.261
	2	121543262	A	G	UTR3	Wdr76	RADAR	repetitive	.	REDI	repetitive	7	0	9	0	12	0	11	0	14	0	4	0	56	0.304	35	0.543	56	0.179	53	0.585	37	0.135	15	0.333
	2	121543274	A	G	UTR3	Wdr76	.	.	.	REDI	repetitive	8	0	10	0	14	0	11	0	15	0	4	0	61	0.213	47	0.404	62	0	66	0.303	41	0	15	0.267
	2	121543632	A	G	UTR3	Wdr76	.	.	.	REDI	repetitive	8	0	5	0	3	0	4	0	8	0	6	0	46	0	32	0.406	18	0	59	0.271	30	0.167	18	0.5
	2	121543637	A	G	UTR3	Wdr76	.	.	.	REDI	repetitive	8	0	5	0	3	0	4	0	8	0	7	0	49	0	34	0.147	17	0	59	0	31	0	20	0
	2	121543638	A	G	UTR3	Wdr76	RADAR	repetitive	.	REDI	repetitive	8	0	5	0	2	0.5	4	0	8	0	8	0	49	0	33	0.303	18	0	59	0.271	30	0.167	18	0.278
	2	121543720	A	G	UTR3	Wdr76	.	.	.	REDI	repetitive	7	0	5	0	5	0	4	0	3	0	5	0	53	0	28	0.321	39	0	62	0.145	30	0	19	0
	2	121543747	A	G	UTR3	Wdr76	.	.	.	REDI	repetitive	7	0	6	0	4	0	5	0	3	0	4	0	52	0	30	0.333	37	0	63	0.381	35	0	17	0
	2	121543758	A	G	UTR3	Wdr76	.	.	.	REDI	repetitive	9	0	5	0	6	0	4	0	4	0	5	0	55	0.164	35	0.571	33	0.182	66	0.53	39	0	21	0.143
	2	121543872	A	G	UTR3	Wdr76	.	.	.	REDI	repetitive	6	0	7	0	8	0	4	0	1	0	3	0	18	0	11	0.273	11	0	24	0.417	15	0	1	0
	2	121543886	A	G	UTR3	Wdr76	.	.	.	REDI	repetitive	6	0	5	0	6	0	3	0	1	0	3	0	16	0	12	0	7	0	23	0.13	16	0	1	0
	2	121543887	A	G	UTR3	Wdr76	.	.	.	REDI	repetitive	6	0	5	0	6	0	3	0	1	0	3	0	16	0	12	0	7	0	23	0.13	17	0	1	0
	2	121544136	A	G	UTR3	Wdr76	.	.	.	REDI	repetitive	3	0	12	0	6	0	1	0	11	0	5	0	55	0	51	0.196	41	0	72	0	47	0	21	0
	2	121544302	A	G	UTR3	Wdr76	.	.	.	REDI	repetitive	6	0	4	0	4	0	12	0	5	0	6	0	37	0	20	0.2	21	0	42	0.167	22	0	16	0
	2	121544309	A	G	UTR3	Wdr76	.	.	.	REDI	repetitive	5	0	5	0	4	0	9	0	6	0	5	0	34	0	19	0.316	22	0	40	0.45	26	0	14	0
	2	121544339	A	G	UTR3	Wdr76	.	.	.	REDI	repetitive	10	0	6	0	4	0	4	0	7	0	6	0	38	0	21	0.333	30	0	36	0.306	24	0	10	0.2
	2	121544352	A	G	UTR3	Wdr76	.	.	.	REDI	repetitive	9	0	4	0	5	0	3	0	7	0	6	0	42	0	21	0.286	30	0.133	35	0.2	25	0	10	0.2
	2	121544394	A	G	UTR3	Wdr76	RADAR	repetitive	.	REDI	repetitive	6	0	4	0	5	0	6	0	6	0	5	0	34	0.235	16	0.688	18	0.333	33	0.424	25	0	8	0.375
	2	121726860	T	C	intronic	Frmd5	.	.	.	REDI	repetitive	N/A	N/A	3	0	6	0.333	3	0	6	0	7	0	N/A	N/A	N/A	N/A	3	0	N/A	N/A	N/A	N/A	1	0
	2	121733066	T	C	intronic	Frmd5	.	.	.	REDI	non-repetitive	2	0	5	0.6	4	0	1	0	3	0	5	0	1	0	N/A	N/A	1	0	N/A	N/A	2	0	10	0
	2	121909289	A	G	intronic	Casc4	.	.	.	REDI	repetitive	9	0	11	0.182	5	0	10	0	14	0	9	0	5	0	3	0	3	0	2	0	6	0	2	0
	2	121910692	A	G	intronic	Casc4	.	.	.	REDI	repetitive	5	0.4	9	0.222	7	0.286	4	0.5	9	0	5	0	5	0	3	0	3	0	1	0	1	0	3	0
	2	121922969	A	G	intronic	Casc4	.	.	.	REDI	repetitive	8	0	4	0.5	8	0	4	0	5	0	3	0	12	0	2	0	9	0	4	0	7	0	4	0
	2	121924779	A	G	intronic	Casc4	.	.	.	REDI	repetitive	4	0	7	0.286	6	0	2	0	6	0	6	0	3	0	2	0	5	0	9	0	5	0	2	0
	2	121924780	A	G	intronic	Casc4	.	.	.	REDI	repetitive	4	0	7	0.286	6	0	2	0	6	0	6	0	3	0	2	0	5	0	9	0	5	0	2	0
	2	121932832	A	G	intronic	Casc4	.	.	.	REDI	repetitive	20	0.35	12	0.25	8	0	24	0	12	0	15	0	10	0	4	0	10	0	21	0	15	0	12	0
	2	122046131	A	G	intronic	Eif3j1;Eif3j2	.	.	.	REDI	repetitive	1	0	2	0	4	0.5	2	0	1	0	2	0	1	0	N/A	N/A	5	0	3	0	1	0	5	0
	2	122089300	T	C	intronic	Spg11	.	.	.	REDI	repetitive	2	0	3	0.667	1	0	4	0	3	0	1	0	3	0	3	0	2	0	1	0	3	0	N/A	N/A
	2	122640859	A	G	ncRNA_exonic	Mir147	.	.	.	REDI	non-repetitive	1	0	2	0	2	0	N/A	N/A	N/A	N/A	3	0	47	0	46	0.196	45	0	73	0	89	0	58	0
	2	124147128	A	G	intronic	Sema6d	.	.	.	REDI	repetitive	3	0	8	0.375	4	0	3	0	8	0	8	0	N/A	N/A	N/A	N/A	N/A	N/A	N/A	N/A	2	0	N/A	N/A
	2	124299849	A	G	intronic	Sema6d	.	.	.	REDI	non-repetitive	2	0	2	1	1	0	N/A	N/A	3	0	1	0	N/A	N/A	N/A	N/A	N/A	N/A	N/A	N/A	1	0	N/A	N/A
	2	124589520	A	G	intronic	Sema6d	.	.	.	REDI	non-repetitive	3	0	2	1	N/A	N/A	1	0	2	0	4	0	N/A	N/A	N/A	N/A	N/A	N/A	N/A	N/A	1	0	N/A	N/A
	2	125090467	T	C	intronic	Myef2	.	.	.	REDI	repetitive	7	0	13	0	6	0	5	0.4	11	0	10	0	14	0	2	0	23	0	9	0	10	0	8	0
	2	125090473	T	C	intronic	Myef2	.	.	.	REDI	repetitive	7	0	12	0	6	0	5	0.4	11	0	10	0	15	0	2	0	24	0	10	0	10	0	8	0
	2	125252586	A	G	intronic	Dut	.	.	.	REDI	repetitive	10	0.2	9	0	1	0	4	0	10	0	12	0	18	0	26	0	21	0	41	0	11	0	8	0
	2	125667484	T	C	intronic	Shc4	.	.	.	REDI	non-repetitive	4	0.5	3	0	N/A	N/A	N/A	N/A	1	0	3	0	1	0	N/A	N/A	N/A	N/A	1	0	N/A	N/A	2	0
	2	125765581	T	C	intronic	Secisbp2l	.	.	.	REDI	repetitive	1	0	7	0.429	3	0	N/A	N/A	N/A	N/A	4	0	5	0	3	0	5	0	11	0	3	0	5	0
	2	125831503	T	C	UTR3	Cops2	.	.	.	REDI	non-repetitive	26	0	22	0	20	0	20	0	117	0	95	0	26	0	48	0.188	10	0	77	0.156	111	0	108	0
	2	126641538	T	C	intronic	Gabpb1	.	.	.	REDI	repetitive	6	0.333	4	0	3	0	N/A	N/A	9	0	6	0	19	0	12	0	27	0	18	0	14	0	15	0
	2	126678593	A	G	intergenic	Gabpb1;Usp8	.	.	.	REDI	repetitive	16	0.562	10	0.5	11	0	14	0	17	0	17	0	19	0.368	28	0.179	16	0	29	0	19	0	9	0
	2	126678645	A	G	intergenic	Gabpb1;Usp8	RADAR	repetitive	DARNED	REDI	repetitive	18	0.278	7	0	8	0	16	0	16	0	13	0	10	0.4	22	0	9	0	24	0	20	0	5	0
	2	126729686	A	G	intronic	Usp8	.	.	.	REDI	repetitive	4	0.75	2	0	1	0	1	0	3	0	3	0	7	0	2	0	2	0	6	0	10	0	5	0
	2	126729688	A	G	intronic	Usp8	.	.	.	REDI	repetitive	3	0.667	2	0	1	0	1	0	3	0	3	0	7	0	4	0	2	0	6	0	10	0	5	0
	2	126729777	A	G	intronic	Usp8	.	.	.	REDI	repetitive	2	0	9	0.333	4	0	7	0	5	0	4	0	6	0	6	0	8	0	13	0	12	0	5	0
	2	126729907	A	G	intronic	Usp8	RADAR	repetitive	DARNED	REDI	repetitive	3	0	9	0	3	0	7	0	4	0	N/A	N/A	12	0.167	3	0	20	0	13	0	12	0	6	0
	2	126745113	A	G	intronic	Usp8	.	.	.	REDI	repetitive	1	0	N/A	N/A	N/A	N/A	2	0	1	0	1	0	4	0	2	1	6	0	1	0	3	0	3	0
	2	126745129	A	G	intronic	Usp8	.	.	.	REDI	repetitive	1	0	N/A	N/A	N/A	N/A	2	1	1	0	1	0	3	0	2	0	6	0	2	0	4	0	4	0
	2	126803199	T	C	intronic	Trpm7	.	.	.	REDI	repetitive	16	0	11	0	8	0	13	0.154	16	0	13	0	30	0	22	0	27	0	25	0	25	0	21	0
	2	126803206	T	C	intronic	Trpm7	.	.	.	REDI	repetitive	14	0.286	13	0	8	0	13	0.154	15	0	12	0	31	0	21	0	26	0	25	0	25	0	20	0
	2	126803616	T	C	intronic	Trpm7	RADAR	repetitive	DARNED	REDI	repetitive	17	0	18	0	14	0	7	0.286	23	0	25	0	40	0	32	0	32	0	35	0	34	0	32	0
	2	126803682	T	C	intronic	Trpm7	RADAR	repetitive	DARNED	REDI	repetitive	10	0	10	0.6	16	0	6	0	20	0	19	0	29	0	16	0	37	0	31	0	37	0	26	0
	2	126803776	T	C	intronic	Trpm7	.	.	.	REDI	repetitive	10	0	8	0.25	10	0	4	0	19	0	8	0	24	0	9	0	20	0	24	0	38	0	26	0
	2	126803777	T	C	intronic	Trpm7	.	.	.	REDI	repetitive	6	0.333	8	0.25	10	0	4	0	19	0	8	0	24	0	9	0	20	0	25	0	38	0	26	0
	2	126803784	T	C	intronic	Trpm7	.	.	.	REDI	repetitive	7	0.286	9	0.222	11	0	4	0	22	0	7	0	25	0	11	0	19	0	26	0	41	0	24	0
	2	126803793	T	C	intronic	Trpm7	.	.	.	REDI	repetitive	7	0.857	9	0.111	9	0	6	0	24	0	7	0	27	0	12	0	19	0	28	0	47	0	25	0
	2	126803837	T	C	intronic	Trpm7	RADAR	repetitive	DARNED	REDI	repetitive	4	0.5	11	0	5	0	7	0	23	0	10	0	17	0	12	0	19	0	31	0	39	0	20	0
	2	126817163	T	C	intronic	Trpm7	RADAR	repetitive	DARNED	REDI	repetitive	2	1	6	0	4	0	6	0	9	0	3	0	11	0	8	0	13	0	14	0	4	0	10	0
	2	126818504	T	C	intronic	Trpm7	.	.	.	REDI	repetitive	4	0	1	0	4	0	4	0.5	4	0	11	0	20	0	4	0	8	0	11	0	11	0	8	0
	2	126834608	T	C	intronic	Trpm7	.	.	.	REDI	repetitive	11	0.545	13	0.308	20	0	10	0	25	0	10	0	14	0	14	0	28	0	20	0	18	0	21	0
	2	126891464	T	C	UTR3	Sppl2a	RADAR	repetitive	.	REDI	repetitive	24	0.25	10	0	9	0	10	0	2	0	7	0.286	33	0.455	28	0.321	35	0.4	28	0.5	39	0.308	19	0.684
	2	126891466	T	C	UTR3	Sppl2a	RADAR	repetitive	.	REDI	repetitive	26	0	10	0	9	0	10	0	2	0	7	0.286	35	0	25	0.16	37	0	30	0	39	0	22	0
	2	126891470	T	C	UTR3	Sppl2a	.	.	.	REDI	repetitive	25	0	10	0	9	0	10	0	3	0	7	0.286	33	0	28	0	36	0	29	0	41	0	22	0
	2	126891471	T	C	UTR3	Sppl2a	RADAR	repetitive	.	REDI	repetitive	24	0.25	9	0	9	0	10	0	3	0	9	0	33	0.303	27	0	35	0.371	28	0.357	41	0.22	21	0.381
	2	126891517	T	C	UTR3	Sppl2a	RADAR	repetitive	.	REDI	repetitive	16	0	8	0.375	13	0	15	0	9	0	6	0	40	0.4	31	0.355	31	0.452	41	0.268	46	0.543	28	0.571
	2	126891537	T	C	UTR3	Sppl2a	.	.	.	REDI	repetitive	15	0.267	4	0.25	11	0	14	0	12	0	10	0	28	0.5	26	0.154	21	0	41	0.171	40	0.3	20	0.4
	2	126891538	T	C	UTR3	Sppl2a	.	.	.	REDI	repetitive	15	0	4	0.25	11	0	14	0	12	0	10	0	30	0	25	0.24	22	0	41	0.171	39	0.179	20	0.4
	2	126892846	T	C	UTR3	Sppl2a	.	.	.	REDI	repetitive	37	0.189	27	0.333	35	0.257	17	0.176	25	0	27	0	56	0.179	32	0.312	43	0.233	40	0.375	56	0.125	32	0
	2	126892851	T	C	UTR3	Sppl2a	.	.	.	REDI	repetitive	38	0.289	27	0.37	34	0	16	0.25	23	0	26	0	58	0.293	31	0.194	40	0	34	0.235	57	0.228	31	0
	2	126892865	T	C	UTR3	Sppl2a	.	.	.	REDI	repetitive	33	0	25	0	28	0	14	0	20	0	21	0	54	0.222	27	0.333	41	0	33	0.152	47	0.17	26	0
	2	126892916	T	C	UTR3	Sppl2a	.	.	.	REDI	repetitive	26	0.269	20	0	17	0	17	0.176	21	0	19	0	48	0.229	29	0.414	62	0.339	48	0.396	42	0.429	26	0.385
	2	126892919	T	C	UTR3	Sppl2a	.	.	.	REDI	repetitive	28	0.179	22	0	17	0	20	0	25	0	20	0	56	0	34	0.206	69	0.145	54	0.185	41	0.244	28	0.25
	2	126914932	T	C	intronic	Sppl2a	RADAR	repetitive	DARNED	REDI	repetitive	21	0	8	0.375	4	0	6	0.333	8	0	12	0	16	0	8	0	15	0	8	0	14	0	8	0
	2	126914937	T	C	intronic	Sppl2a	RADAR	repetitive	DARNED	REDI	repetitive	16	0.688	9	0.667	4	0.5	6	0.333	8	0	12	0	17	0	7	0	14	0	9	0	17	0	8	0
	2	126916177	T	C	intronic	Sppl2a	RADAR	repetitive	DARNED	REDI	repetitive	18	0.222	15	0	12	0	8	0	10	0	19	0	21	0	17	0	23	0	22	0	30	0	13	0
	2	126916182	T	C	intronic	Sppl2a	RADAR	repetitive	DARNED	REDI	repetitive	14	0.643	14	0.286	12	0.167	7	0	10	0	19	0	21	0	17	0	21	0	20	0	30	0	13	0
	2	127244043	T	C	intronic	Ciao1	.	.	.	REDI	repetitive	4	0.25	5	0	6	0	11	0	6	0	6	0	6	0	1	0	4	0	4	0	13	0	4	0
	2	127289699	A	G	intronic	Stard7	RADAR	repetitive	DARNED	REDI	repetitive	11	0.273	3	0	5	0	6	0	3	0	N/A	N/A	6	0	4	0	2	0	10	0	5	0	N/A	N/A
	2	128969590	A	G	intronic	Zc3h6	.	.	.	REDI	repetitive	11	0	12	0.25	7	0	8	0	12	0	5	0	44	0	24	0	71	0	29	0	37	0	41	0
	2	128969592	A	G	intronic	Zc3h6	RADAR	repetitive	.	REDI	repetitive	10	0.3	12	0.5	7	0	8	0	12	0	5	0	40	0.15	24	0	71	0	29	0	37	0	41	0
	2	128998397	A	G	intronic	Zc3h6	.	.	.	REDI	repetitive	1	0	1	0	2	0	3	1	N/A	N/A	N/A	N/A	11	0.182	6	0	2	0	N/A	N/A	5	0	N/A	N/A
	2	128998401	A	G	intronic	Zc3h6	.	.	.	REDI	repetitive	1	0	1	0	2	0	3	1	N/A	N/A	N/A	N/A	13	0	6	0	2	0	N/A	N/A	5	0	N/A	N/A
	2	128998875	A	G	intronic	Zc3h6	.	.	.	REDI	repetitive	N/A	N/A	N/A	N/A	2	0	4	0	4	0	1	0	8	0	3	0.667	3	0	N/A	N/A	N/A	N/A	3	0
	2	128998924	A	G	intronic	Zc3h6	.	.	.	REDI	repetitive	N/A	N/A	N/A	N/A	N/A	N/A	2	1	2	0	1	0	10	0	3	0	5	0	N/A	N/A	1	0	2	0
	2	128998952	A	G	intronic	Zc3h6	.	.	.	REDI	repetitive	1	0	2	0	N/A	N/A	1	0	4	0	N/A	N/A	10	0	3	0.667	5	0	N/A	N/A	3	0	4	0
	2	130404508	T	C	upstream	1700020A23Rik	.	.	.	REDI	repetitive	5	0	5	0	1	0	3	0.667	3	0	1	0	1	0	N/A	N/A	2	0	N/A	N/A	2	0	2	0
	2	130414485	T	C	intergenic	Tmem239;Pced1a	.	.	.	REDI	repetitive	6	0.667	5	0	11	0	7	0	4	0	3	0	3	0	1	0	6	0	N/A	N/A	2	0	2	0
	2	130414494	T	C	intergenic	Tmem239;Pced1a	.	.	.	REDI	repetitive	5	0.8	4	0	10	0	7	0	4	0	4	0	2	0	N/A	N/A	6	0	N/A	N/A	2	0	2	0
	2	130414893	T	C	intergenic	Tmem239;Pced1a	.	.	.	REDI	repetitive	8	0.375	3	0	2	0	7	0	7	0	6	0	1	0	2	0	7	0	3	0	4	0	2	0
	2	130506048	A	G	intronic	Ptpra	.	.	.	REDI	repetitive	8	0.5	5	0.6	4	0	5	0	6	0	5	0	6	0	14	0	18	0	11	0	6	0	1	0
	2	130547809	A	G	ncRNA_intronic	4930473A02Rik	.	.	.	REDI	repetitive	2	0	4	0.5	3	0	1	0	2	0	2	0	17	0	4	0	7	0	4	0	9	0	4	0
	2	130554920	A	G	ncRNA_intronic	4930473A02Rik	RADAR	repetitive	DARNED	REDI	repetitive	10	0.9	21	0.952	10	0.7	11	0.818	23	0.13	9	0.222	13	0.308	8	0	10	0	4	0	9	0	4	0
	2	130554923	A	G	ncRNA_intronic	4930473A02Rik	.	.	.	REDI	repetitive	10	0.2	21	0.286	11	0	13	0	23	0	8	0	12	0	8	0	10	0	4	0	9	0	4	0
	2	130554934	A	G	ncRNA_intronic	4930473A02Rik	RADAR	repetitive	DARNED	REDI	repetitive	10	0.6	24	0	10	0.2	13	0	25	0	9	0	12	0	9	0	11	0	5	0	8	0	3	0
	2	130554939	A	G	ncRNA_intronic	4930473A02Rik	RADAR	repetitive	DARNED	REDI	repetitive	10	0	19	0.316	8	0	13	0	23	0	9	0	10	0.3	9	0	12	0	6	0	6	0	4	0
	2	130554956	A	G	ncRNA_intronic	4930473A02Rik	RADAR	repetitive	DARNED	REDI	repetitive	9	0	13	0.769	6	0.667	10	0	18	0	9	0	11	0.182	6	0	9	0	6	0	3	0	4	0
	2	130555884	A	G	ncRNA_intronic	4930473A02Rik	RADAR	repetitive	DARNED	REDI	repetitive	9	0	9	0	7	0.286	9	0.222	15	0	9	0	7	0	4	0	5	0	4	0	5	0	1	0
	2	130555899	A	G	ncRNA_intronic	4930473A02Rik	RADAR	repetitive	DARNED	REDI	repetitive	15	0.2	14	0	7	0	10	0	20	0	12	0	9	0	5	0	5	0	4	0	6	0	2	0
	2	130555989	A	G	ncRNA_intronic	4930473A02Rik	RADAR	repetitive	DARNED	REDI	repetitive	15	0.2	12	0	6	0	14	0	12	0	9	0	10	0	5	0	6	0	2	0	2	0	2	0
	2	130556053	A	G	ncRNA_intronic	4930473A02Rik	.	.	.	REDI	repetitive	4	0.75	9	0.667	6	0	15	0.267	9	0	5	0	10	0	2	0	3	0	4	0	4	0	1	0
	2	130556054	A	G	ncRNA_intronic	4930473A02Rik	RADAR	repetitive	DARNED	REDI	repetitive	7	0	9	0.333	6	0	15	0	9	0	5	0	10	0	2	0	3	0	4	0	4	0	1	0
	2	130556882	A	G	ncRNA_intronic	4930473A02Rik	.	.	.	REDI	repetitive	6	0	11	0.273	3	0	9	0	6	0	12	0	2	0	3	0	2	0	7	0	3	0	1	0
	2	130568170	A	G	intergenic	Mrps26;Oxt	RADAR	repetitive	DARNED	REDI	repetitive	13	0	15	0	22	0	19	0	24	0	33	0	1	0	3	0	3	0.667	2	0	3	0	2	0
	2	130568173	A	G	intergenic	Mrps26;Oxt	.	.	.	REDI	repetitive	11	0.455	15	0	22	0	19	0	24	0	33	0	1	0	3	0	3	0.667	2	0	3	0	2	0
	2	130653144	T	C	downstream	Ddrgk1	.	.	.	REDI	repetitive	7	0	6	0.333	1	0	2	0	2	0	2	0	1	0	6	0.5	2	0	3	0	6	0	1	0
	2	130715386	T	C	intronic	4930402H24Rik	RADAR	repetitive	DARNED	REDI	non-repetitive	6	0	4	0.25	9	0	4	0	9	0	4	0	2	0	3	0	3	0	2	0	4	0.5	1	0
	2	130715391	T	C	intronic	4930402H24Rik	RADAR	repetitive	DARNED	REDI	non-repetitive	7	0.286	7	0	11	0	4	0	9	0	5	0	2	0	4	0	2	0	2	0	4	0	2	0
	2	130717579	T	C	intronic	4930402H24Rik	.	.	.	REDI	repetitive	2	1	1	0	4	0	1	0	2	0	6	0	6	0	2	0	N/A	N/A	7	0	N/A	N/A	1	0
	2	130726233	T	C	intronic	4930402H24Rik	RADAR	repetitive	DARNED	REDI	repetitive	11	0	2	0	3	0	7	0.286	5	0	9	0	5	0	4	0	6	0	7	0	3	0	3	0
	2	130726426	T	C	intronic	4930402H24Rik	.	.	.	REDI	repetitive	8	0	7	0.286	4	0	5	0	3	0	11	0	2	0	4	0	11	0	4	0	1	0	5	0
	2	130762559	T	C	intronic	4930402H24Rik	.	.	.	REDI	repetitive	4	0	6	0	3	0	2	0.5	5	0	3	0	N/A	N/A	2	0	1	0	3	0	4	0	N/A	N/A
	2	130762564	T	C	intronic	4930402H24Rik	.	.	.	REDI	repetitive	4	0	6	0.333	3	0.667	1	1	6	0	3	0	N/A	N/A	2	0	1	0	3	0	4	0	N/A	N/A
	2	130762575	T	C	intronic	4930402H24Rik	.	.	.	REDI	repetitive	4	0	6	0	2	0	2	1	6	0	3	0	N/A	N/A	2	0	1	0	3	0	3	0	N/A	N/A
	2	130767043	T	C	intronic	4930402H24Rik	.	.	.	REDI	repetitive	11	0.364	8	0	10	0	4	0.5	7	0	9	0	4	0	N/A	N/A	2	0	7	0	3	0	1	0
	2	130771852	T	C	intronic	4930402H24Rik	.	.	.	REDI	repetitive	7	0	10	0.2	7	0	9	0	12	0	10	0	1	0	2	0	N/A	N/A	4	0	1	0	4	0
	2	130774627	T	C	intronic	4930402H24Rik	.	.	.	REDI	non-repetitive	3	0	4	0.5	6	0	8	0	2	0	6	0	1	0	3	0	3	0	5	0	1	0	2	0
	2	130780074	T	C	intronic	4930402H24Rik	.	.	.	REDI	repetitive	13	0.231	8	0	23	0	8	0	19	0	21	0	N/A	N/A	10	0	3	0	16	0	N/A	N/A	3	0
	2	130782953	T	C	intronic	4930402H24Rik	.	.	.	REDI	repetitive	11	0.636	8	0.375	6	0	7	0	8	0	14	0	1	0	10	0	5	0	3	0	1	0	1	0
	2	130788373	T	C	intronic	4930402H24Rik	.	.	.	REDI	repetitive	12	0	13	0	5	0.4	6	0	10	0	6	0	2	0	1	0	2	0	1	0	3	0	N/A	N/A
	2	130810004	T	C	intronic	4930402H24Rik	.	.	.	REDI	repetitive	6	0	8	0.25	4	0	4	0	2	0	6	0	1	0	8	0	2	0	4	0	1	0	1	0
	2	130870264	T	C	intergenic	4930402H24Rik;A730017L22Rik	RADAR	repetitive	DARNED	REDI	repetitive	10	0.6	5	0	6	0	4	0	2	0	6	0	8	0	2	0	3	0	N/A	N/A	N/A	N/A	3	0
	2	130870265	T	C	intergenic	4930402H24Rik;A730017L22Rik	.	.	.	REDI	repetitive	11	0	5	0.4	6	0	4	0	2	0	6	0	8	0	2	0	3	0	N/A	N/A	N/A	N/A	3	0
	2	130870266	T	C	intergenic	4930402H24Rik;A730017L22Rik	RADAR	repetitive	DARNED	REDI	repetitive	9	0.667	4	0	6	0	4	0	2	0	6	0	8	0	2	0	3	0	N/A	N/A	N/A	N/A	3	0
	2	130870269	T	C	intergenic	4930402H24Rik;A730017L22Rik	RADAR	repetitive	DARNED	REDI	repetitive	9	0.444	4	0.5	6	0	4	0	2	0	6	0	7	0	2	0	3	0	N/A	N/A	N/A	N/A	3	0
	2	130872892	T	C	ncRNA_exonic	A730017L22Rik	.	.	.	REDI	repetitive	13	0	10	0	17	0	5	0	7	0	2	0	5	0	11	0	7	0	10	0.2	7	0	4	0
	2	130873981	T	C	ncRNA_exonic	A730017L22Rik	.	.	.	REDI	repetitive	13	0.308	7	0	11	0	7	0	4	0	4	0	5	0	N/A	N/A	2	0	1	0	1	0	2	0
	2	130898959	T	C	ncRNA_intronic	A730017L22Rik	.	.	.	REDI	repetitive	N/A	N/A	2	0	2	0	2	1	1	0	N/A	N/A	2	0	N/A	N/A	5	0	8	0	3	0	1	0
	2	130900320	T	C	ncRNA_intronic	A730017L22Rik	RADAR	repetitive	DARNED	REDI	repetitive	4	0	1	0	1	0	1	0	N/A	N/A	1	0	1	0	4	0.5	6	0	4	0	1	0	6	0
	2	130958336	A	G	intronic	Atrn	.	.	.	REDI	repetitive	3	1	6	0.333	7	0	3	0	2	0	N/A	N/A	2	0	9	0	3	0	8	0	3	0	4	0
	2	130978595	A	G	intronic	Atrn	.	.	.	REDI	non-repetitive	6	0.333	N/A	N/A	2	0	4	0	4	0	2	0	8	0	1	0	4	0	4	0	1	0	2	0
	2	131248114	A	G	ncRNA_intronic	Mir3098	.	.	.	REDI	repetitive	2	1	1	0	N/A	N/A	3	0	2	0	N/A	N/A	5	0	4	0.75	4	0	5	0	1	0	N/A	N/A
	2	131248121	A	G	ncRNA_intronic	Mir3098	.	.	.	REDI	repetitive	2	0	1	0	N/A	N/A	3	0	3	0	N/A	N/A	5	0	4	0.75	4	0	6	0	1	0	1	0
	2	131252264	A	G	ncRNA_intronic	Mir3098	.	.	.	REDI	repetitive	N/A	N/A	N/A	N/A	4	0	1	0	1	0	N/A	N/A	1	0	N/A	N/A	N/A	N/A	4	0.5	N/A	N/A	N/A	N/A
	2	131270442	A	G	ncRNA_intronic	Mir3098	.	.	.	REDI	repetitive	4	0	5	0.4	5	0	4	0	7	0	7	0	7	0	6	0	3	0	14	0	4	0	2	0
	2	131277331	A	G	ncRNA_intronic	Mir3098	.	.	.	REDI	repetitive	5	0	4	0	14	0	3	0	5	0	6	0	20	0.15	21	0	15	0	53	0	19	0	1	0
	2	131310621	T	C	ncRNA_intronic	Mir3098	.	.	.	REDI	repetitive	3	0	4	0.5	2	0	N/A	N/A	3	0	3	0	1	0	N/A	N/A	N/A	N/A	N/A	N/A	2	0	2	0
	2	131312147	T	C	ncRNA_intronic	Mir3098	.	.	.	REDI	repetitive	2	0	3	0	5	0.6	2	0	N/A	N/A	13	0	2	0	1	0	2	0	N/A	N/A	1	0	N/A	N/A
	2	131312195	T	C	ncRNA_intronic	Mir3098	.	.	.	REDI	repetitive	3	0.667	4	0.5	7	0	3	0	3	0	17	0	4	0	2	0	1	0	N/A	N/A	3	0	N/A	N/A
	2	131312196	T	C	ncRNA_intronic	Mir3098	.	.	.	REDI	repetitive	3	0.667	4	0.5	7	0	3	0	3	0	17	0	4	0	2	0	1	0	N/A	N/A	3	0	N/A	N/A
	2	132083429	T	C	intronic	Slc23a2	.	.	.	REDI	repetitive	3	0.667	9	0.444	2	0	4	0	3	0	2	0	N/A	N/A	2	0	2	0	4	0	4	0	2	0
	2	132309633	A	G	UTR3	Cds2	RADAR	repetitive	.	REDI	repetitive	161	0	147	0	150	0	106	0	145	0	151	0	36	0.278	43	0.419	35	0	72	0.292	39	0.231	23	0.478
	2	132309669	A	G	UTR3	Cds2	RADAR	repetitive	DARNED	REDI	repetitive	147	0	134	0	137	0	96	0	127	0	156	0	33	0.182	61	0.279	41	0	74	0.27	30	0	16	0.312
	2	132309873	A	G	UTR3	Cds2	RADAR	repetitive	.	REDI	repetitive	160	0	152	0	125	0	129	0	147	0	157	0	42	0	83	0.157	51	0.157	130	0	37	0	20	0
	2	132309880	A	G	UTR3	Cds2	RADAR	repetitive	DARNED	REDI	repetitive	149	0.711	145	0.71	119	0.151	126	0.135	150	0	143	0.147	40	0.5	84	0.536	46	0.5	119	0.487	34	0.324	18	0
	2	132575206	T	C	intronic	Gpcpd1	.	.	.	REDI	repetitive	5	0	7	0.286	3	0	4	0	6	0	7	0	10	0	11	0.273	8	0	10	0	7	0	8	0
	2	135331752	A	G	intronic	Plcb1	.	.	.	REDI	repetitive	2	1	N/A	N/A	2	0	3	0	2	0	1	0	N/A	N/A	N/A	N/A	N/A	N/A	N/A	N/A	N/A	N/A	N/A	N/A
	2	135415211	A	G	intronic	Plcb1	RADAR	non-repetitive	DARNED	REDI	non-repetitive	3	0.667	9	0	2	0	3	0	3	0	3	0	2	0	N/A	N/A	N/A	N/A	N/A	N/A	N/A	N/A	1	0
	2	135659372	A	G	intergenic	9630028H03Rik;Plcb4	.	.	.	REDI	non-repetitive	2	1	N/A	N/A	N/A	N/A	N/A	N/A	N/A	N/A	N/A	N/A	N/A	N/A	N/A	N/A	N/A	N/A	N/A	N/A	1	0	N/A	N/A
	2	135668584	A	G	intergenic	9630028H03Rik;Plcb4	.	.	.	REDI	repetitive	3	0.667	1	0	2	0	N/A	N/A	1	0	N/A	N/A	2	0	N/A	N/A	1	0	N/A	N/A	N/A	N/A	1	0
	2	135829592	A	G	intronic	Plcb4	.	.	.	REDI	non-repetitive	3	0	1	0	1	0	2	1	1	0	N/A	N/A	2	0	N/A	N/A	1	0	2	0	4	0	4	0
	2	135829650	A	G	intronic	Plcb4	.	.	.	REDI	non-repetitive	3	0	3	0	2	0	2	1	2	0	N/A	N/A	1	0	N/A	N/A	2	0	1	0	7	0	1	0
	2	135965920	A	G	intronic	Plcb4	.	.	.	REDI	non-repetitive	8	0.375	5	0	6	0	2	0	11	0	5	0	12	0	3	0.667	14	0	7	0	6	0	7	0
	2	135965982	A	G	intronic	Plcb4	.	.	.	REDI	non-repetitive	8	0.5	11	0.636	4	0	4	0	7	0	8	0	17	0	4	0	12	0	6	0	6	0	11	0
	2	135965983	A	G	intronic	Plcb4	.	.	.	REDI	non-repetitive	8	0.25	11	0.273	4	0	4	0	7	0	8	0	17	0	4	0	12	0	6	0	6	0	11	0
	2	136310952	T	C	intronic	Pak7	.	.	.	REDI	repetitive	N/A	N/A	3	0.667	5	0.4	1	0	2	0	4	0	N/A	N/A	N/A	N/A	N/A	N/A	N/A	N/A	1	0	5	0
	2	140055385	T	C	intronic	Tasp1	.	.	.	REDI	repetitive	2	0	7	0	6	0	2	0	6	0	5	0	7	0.286	6	0	9	0	3	0	3	0	1	0
	2	140056931	T	C	intronic	Tasp1	.	.	.	REDI	repetitive	7	0.286	4	0	3	0	8	0	1	0	N/A	N/A	2	0	1	0	3	0	5	0	7	0	3	0
	2	140063678	T	C	intronic	Tasp1	.	.	.	REDI	repetitive	2	0	5	0	4	0	7	0.714	1	0	2	0	2	0	3	0	5	0	1	0	5	0	2	0
	2	140063682	T	C	intronic	Tasp1	.	.	.	REDI	repetitive	2	0	3	0.667	2	0	6	0.333	1	0	2	0	2	0	3	0	5	0	1	0	5	0	1	0
	2	140064021	T	C	intronic	Tasp1	.	.	.	REDI	repetitive	1	0	3	0	2	1	3	0	2	0	3	0	3	0	3	0	3	0	3	0	2	0	1	0
	2	140064026	T	C	intronic	Tasp1	.	.	.	REDI	repetitive	1	0	3	0	3	0	3	0	2	0	3	0	2	0	3	0.667	4	0	3	0	2	0	1	0
	2	140064688	T	C	intronic	Tasp1	.	.	.	REDI	repetitive	4	0	3	0.667	1	0	2	0	3	0	N/A	N/A	3	0	1	0	8	0	4	0	3	0	N/A	N/A
	2	140190822	A	G	intronic	Ndufaf5	.	.	.	REDI	repetitive	6	0.333	7	0.286	6	0	4	0	10	0	6	0	3	0	4	0	1	0	1	0	4	0	2	0
	2	140512349	A	G	intronic	Macrod2	.	.	.	REDI	repetitive	4	0.5	4	0	9	0	4	0	5	0	7	0	1	0	N/A	N/A	N/A	N/A	3	0	N/A	N/A	2	0
	2	140512406	A	G	intronic	Macrod2	.	.	.	REDI	repetitive	7	0	5	0	10	0	3	0	7	0	8	0	1	0	1	0	N/A	N/A	3	0.667	N/A	N/A	3	0
	2	140803219	A	G	intronic	Macrod2	.	.	.	REDI	repetitive	2	1	1	0	2	0	N/A	N/A	N/A	N/A	3	0	N/A	N/A	N/A	N/A	N/A	N/A	N/A	N/A	N/A	N/A	N/A	N/A
	2	141197707	A	G	intronic	Macrod2	.	.	.	REDI	non-repetitive	6	0.5	4	0.5	5	0	7	0	10	0	3	0	N/A	N/A	4	0	N/A	N/A	3	0	3	0	N/A	N/A
	2	141203442	A	G	intronic	Macrod2	.	.	.	REDI	non-repetitive	4	0	5	0.4	7	0	1	0	4	0	1	0	1	0	N/A	N/A	1	0	N/A	N/A	1	0	N/A	N/A
	2	141220772	A	G	intronic	Macrod2	.	.	.	REDI	repetitive	N/A	N/A	3	0.667	N/A	N/A	3	0	2	0	3	0	N/A	N/A	N/A	N/A	N/A	N/A	N/A	N/A	N/A	N/A	N/A	N/A
	2	141227077	A	G	intronic	Macrod2	.	.	.	REDI	non-repetitive	N/A	N/A	2	0	3	0	1	0	N/A	N/A	3	0	N/A	N/A	3	0.667	2	0	1	0	N/A	N/A	N/A	N/A
	2	141227801	A	G	intronic	Macrod2	.	.	.	REDI	non-repetitive	3	0.667	N/A	N/A	10	0	3	0	1	0	1	0	N/A	N/A	1	0	N/A	N/A	2	0	1	0	1	0
	2	143698585	A	G	intronic	Pcsk2	.	.	.	REDI	repetitive	N/A	N/A	1	1	2	0	2	0	2	0	3	0	N/A	N/A	N/A	N/A	N/A	N/A	N/A	N/A	N/A	N/A	N/A	N/A
	2	144531555	A	G	intronic	Polr3f	RADAR	repetitive	DARNED	REDI	repetitive	9	0.667	21	0.381	8	0	7	0	10	0	15	0	30	0	9	0	23	0	22	0	9	0	15	0
	2	144531558	A	G	intronic	Polr3f	.	.	.	REDI	repetitive	9	0.222	22	0	7	0	7	0	10	0	14	0	30	0	9	0	23	0	21	0	9	0	15	0
	2	144531559	A	G	intronic	Polr3f	RADAR	repetitive	DARNED	REDI	repetitive	10	0	22	0.273	7	0	7	0	10	0	14	0	30	0	9	0	22	0	21	0	8	0	15	0
	2	144531747	A	G	intronic	Polr3f	.	.	.	REDI	repetitive	12	0.75	12	0.5	10	0	10	0	9	0	5	0	12	0.333	13	0	13	0	18	0	15	0	10	0
	2	144539899	A	G	UTR3	Polr3f	RADAR	repetitive	DARNED	REDI	repetitive	75	0	60	0	49	0	72	0	67	0	82	0	51	0	32	0.188	35	0	53	0.208	56	0	32	0
	2	144540438	A	G	UTR3	Polr3f	RADAR	repetitive	DARNED	REDI	repetitive	92	0.402	91	0.341	82	0	90	0	82	0	97	0	59	0.322	48	0.292	40	0.25	86	0.267	77	0.273	52	0.346
	2	144540439	A	G	UTR3	Polr3f	RADAR	repetitive	DARNED	REDI	repetitive	90	0.2	94	0	83	0	90	0	82	0	97	0	60	0.183	48	0	41	0	87	0	77	0.169	53	0
	2	145908507	A	G	intronic	Naa20	.	.	.	REDI	repetitive	12	0.25	14	0	12	0	16	0	13	0	11	0	11	0	16	0	22	0	19	0	15	0	7	0
	2	145913274	T	C	intronic	Naa20	.	.	.	REDI	repetitive	20	0.35	20	0.4	13	0	10	0	19	0	10	0	35	0	10	0	20	0	9	0	23	0	28	0
	2	146393393	T	C	intronic	Ralgapa2	.	.	.	REDI	non-repetitive	2	1	3	0	2	0	N/A	N/A	2	0	1	0	3	0	2	0	12	0	5	0	2	0	3	0.667
	2	147941948	T	C	intergenic	A530006G24Rik;Foxa2	.	.	.	REDI	non-repetitive	N/A	N/A	3	0.667	1	0	1	0	1	0	N/A	N/A	N/A	N/A	N/A	N/A	N/A	N/A	N/A	N/A	1	0	N/A	N/A
	2	148702229	T	C	intronic	Napb	.	.	.	REDI	repetitive	7	0.571	6	0	4	0.75	1	0	4	0	6	0	1	0	1	0	1	0	2	0	1	0	N/A	N/A
	2	150332487	T	C	intronic	3300002I08Rik	.	.	.	REDI	repetitive	13	0	13	0.154	12	0	10	0	6	0	2	0	4	0	3	0	4	0	4	0	8	0	1	0
	2	150332678	T	C	intronic	3300002I08Rik	.	.	.	REDI	repetitive	8	0.25	9	0	7	0	9	0	2	0	4	0	2	0	N/A	N/A	1	0	5	0	7	0	2	0
	2	150334873	T	C	intronic	3300002I08Rik	.	.	.	REDI	repetitive	6	0	8	0	13	0.154	3	0	4	0	2	0	10	0	3	0	6	0	11	0	8	0	8	0
	2	150334879	T	C	intronic	3300002I08Rik	.	.	.	REDI	repetitive	5	0	8	0	14	0.143	3	0	6	0	2	0	10	0	4	0	7	0	11	0	8	0	8	0
	2	150499640	T	C	intergenic	Zfp345;Cst7	.	.	.	REDI	non-repetitive	2	1	N/A	N/A	1	0	1	0	1	0	2	0	N/A	N/A	N/A	N/A	N/A	N/A	N/A	N/A	N/A	N/A	1	0
	2	150635894	T	C	intronic	Acss1	.	.	.	REDI	repetitive	4	0.5	7	0	3	0	1	0	1	0	7	0	23	0	8	0	27	0	16	0	10	0	1	0
	2	150636020	T	C	intronic	Acss1	.	.	.	REDI	repetitive	3	0	5	0	N/A	N/A	3	0.667	3	0	4	0	18	0	13	0	16	0	13	0	11	0	3	0
	2	150761008	A	G	intronic	Entpd6	RADAR	repetitive	DARNED	REDI	repetitive	12	0.25	18	0	7	0	11	0	13	0	9	0	5	0	N/A	N/A	2	0	2	0	5	0	N/A	N/A
	2	150897661	T	C	intronic	Abhd12	.	.	.	REDI	repetitive	3	0	6	0.5	2	0	3	0	6	0	1	0	3	0	2	0	5	0	5	0	3	0	1	0
	2	151034393	T	C	intronic	Nanp	.	.	.	REDI	repetitive	3	0.667	2	0	N/A	N/A	2	0	N/A	N/A	2	0	4	0	6	0	5	0	8	0	2	0	3	0
	2	151520772	A	G	intergenic	Nsfl1c;Fkbp1a	.	.	.	REDI	repetitive	3	0	8	0.375	8	0.375	14	0.643	1	0	4	0	3	0	N/A	N/A	6	0	N/A	N/A	6	0	4	0
	2	151618639	T	C	intronic	Snph	RADAR	non-repetitive	DARNED	REDI	non-repetitive	5	0	5	0.2	1	0	2	0	5	0	N/A	N/A	N/A	N/A	N/A	N/A	N/A	N/A	N/A	N/A	N/A	N/A	N/A	N/A
	2	152232737	A	G	intronic	Csnk2a1	.	.	.	REDI	repetitive	8	0	3	0	N/A	N/A	4	0.5	3	0	3	0	10	0	12	0	8	0	16	0	2	0	5	0
	2	152236336	A	G	intronic	Csnk2a1	.	.	.	REDI	repetitive	2	0	5	0	6	0	2	0	1	0	3	0	7	0.286	9	0	8	0	15	0	7	0	4	0
	2	152236337	A	G	intronic	Csnk2a1	.	.	.	REDI	repetitive	2	0	5	0	5	0	2	0	1	0	3	0	7	0.286	9	0	8	0	15	0	6	0	4	0
	2	152237661	A	G	intronic	Csnk2a1	.	.	.	REDI	repetitive	5	0.4	4	0	N/A	N/A	N/A	N/A	3	0	2	0	N/A	N/A	2	0	3	0	2	0	N/A	N/A	5	0
	2	152256534	A	G	intronic	Csnk2a1	.	.	.	REDI	repetitive	7	0	7	0.286	5	0	4	0	6	0	8	0	N/A	N/A	7	0	5	0	17	0	9	0	1	0
	2	152270616	A	G	intronic	Csnk2a1	RADAR	repetitive	DARNED	REDI	repetitive	4	0.5	6	0	3	0	1	0	4	0	10	0	13	0	8	0	8	0	27	0	7	0	6	0
	2	152273022	A	G	intronic	Csnk2a1	RADAR	repetitive	DARNED	REDI	repetitive	26	0.731	17	0.765	20	0	17	0	31	0	23	0	25	0	49	0	30	0	86	0	42	0	19	0
	2	152325819	T	C	intronic	Rbck1	.	.	.	REDI	repetitive	2	1	8	0.25	5	0.4	4	0	8	0	10	0	25	0	10	0	21	0	35	0	12	0	17	0
	2	152325820	T	C	intronic	Rbck1	.	.	.	REDI	repetitive	2	1	8	0.5	8	0	4	0	9	0	11	0	25	0.24	10	0	21	0	35	0	12	0	18	0
	2	152325826	T	C	intronic	Rbck1	.	.	.	REDI	repetitive	2	1	8	0.25	8	0	6	0	9	0	11	0	24	0	11	0	23	0	35	0	14	0	19	0
	2	152325828	T	C	intronic	Rbck1	.	.	.	REDI	repetitive	5	0	9	0.222	8	0	5	0	9	0	11	0	24	0.167	11	0	23	0	35	0	14	0	20	0
	2	152327847	T	C	intronic	Rbck1	.	.	.	REDI	repetitive	4	0.75	2	0	7	0	2	0	2	0	5	0	8	0	7	0	2	0	6	0	6	0	3	0
	2	152371208	T	C	ncRNA_intronic	Gm14164	RADAR	repetitive	DARNED	REDI	repetitive	5	0	1	1	1	0	2	0	2	0	1	0	N/A	N/A	N/A	N/A	N/A	N/A	N/A	N/A	N/A	N/A	1	0
	2	152371854	T	C	ncRNA_intronic	Gm14164	.	.	.	REDI	repetitive	2	0	2	0	3	0	5	0.4	N/A	N/A	N/A	N/A	N/A	N/A	N/A	N/A	N/A	N/A	N/A	N/A	2	0	1	0
	2	152423680	A	G	intronic	6820408C15Rik	.	.	.	REDI	repetitive	N/A	N/A	N/A	N/A	N/A	N/A	N/A	N/A	N/A	N/A	N/A	N/A	2	1	N/A	N/A	N/A	N/A	N/A	N/A	N/A	N/A	N/A	N/A
	2	152688255	A	G	intronic	H13	RADAR	repetitive	DARNED	REDI	repetitive	13	0.538	10	0.5	14	0	18	0	15	0	19	0	25	0.2	19	0	22	0	39	0	23	0	27	0
	2	152688256	A	G	intronic	H13	RADAR	repetitive	DARNED	REDI	repetitive	13	0.692	10	0.5	14	0	18	0	15	0	19	0	25	0.2	19	0	22	0	41	0	24	0	27	0
	2	152688353	A	G	intronic	H13	.	.	.	REDI	repetitive	16	0.375	11	0	14	0	17	0	14	0	18	0	26	0	17	0	21	0	40	0	25	0	18	0
	2	152702701	A	G	intronic	H13	RADAR	repetitive	DARNED	REDI	repetitive	12	0.167	11	0	9	0	5	0	10	0	16	0	20	0	21	0	17	0	20	0	8	0	8	0
	2	153186849	A	G	intronic	Tm9sf4	.	.	.	REDI	non-repetitive	2	0	3	0.667	N/A	N/A	2	0	3	0	6	0	5	0	5	0	4	0	6	0	4	0	2	0
	2	153266464	A	G	UTR3	Pofut1	.	.	.	REDI	non-repetitive	38	0	28	0.143	38	0	30	0	31	0	39	0	29	0	37	0	29	0	65	0	26	0	16	0
	2	153271198	A	G	downstream	Pofut1	.	.	.	REDI	repetitive	10	0.2	15	0.333	6	0	7	0	11	0	12	0	14	0	4	0	11	0	3	0	7	0	7	0
	2	153325537	A	G	intronic	Kif3b	RADAR	repetitive	DARNED	REDI	repetitive	4	0	4	0	N/A	N/A	1	0	1	0	5	0	N/A	N/A	2	0	2	0	7	0.286	4	0	2	0
	2	153617276	T	C	UTR3	Commd7	.	.	.	REDI	repetitive	27	0.296	22	0.273	21	0	19	0	26	0	20	0	12	0	3	0	11	0	5	0	7	0	10	0
	2	153617285	T	C	UTR3	Commd7	.	.	.	REDI	repetitive	27	0	23	0	21	0	18	0	28	0	22	0	9	0	3	0.667	11	0	5	0	7	0	10	0
	2	153617294	T	C	UTR3	Commd7	.	.	.	REDI	repetitive	25	0	21	0	23	0	15	0	21	0	21	0	7	0	2	0.5	11	0	5	0	7	0	10	0
	2	153617306	T	C	UTR3	Commd7	.	.	.	REDI	repetitive	25	0.52	15	0	22	0	14	0.357	22	0	21	0	9	0	2	0.5	10	0	4	0	7	0	7	0
	2	153618389	T	C	UTR3	Commd7	.	.	.	REDI	repetitive	18	0.222	14	0.357	21	0	20	0	23	0	23	0	9	0	7	0	14	0	8	0.5	12	0	1	0
	2	154369968	T	C	intronic	Cdk5rap1	.	.	.	REDI	repetitive	1	0	1	0	3	0	2	0	1	0	6	0	4	0.5	N/A	N/A	10	0	3	0	3	0	4	0
	2	154400721	T	C	intronic	Snta1	.	.	.	REDI	repetitive	5	0	2	1	8	0	3	0	4	0	4	0	N/A	N/A	N/A	N/A	N/A	N/A	N/A	N/A	2	0	2	0
	2	154400763	T	C	intronic	Snta1	.	.	.	REDI	repetitive	4	0	3	0.667	5	0	3	0	2	0	2	0	N/A	N/A	N/A	N/A	N/A	N/A	N/A	N/A	1	0	1	0
	2	154400900	T	C	intronic	Snta1	.	.	.	REDI	repetitive	4	0	7	0.429	7	0	2	0	2	0	3	0	1	0	N/A	N/A	1	0	1	0	1	0	N/A	N/A
	2	154400926	T	C	intronic	Snta1	.	.	.	REDI	repetitive	3	0.667	4	0	5	0	2	1	1	0	1	0	1	0	N/A	N/A	1	0	1	0	1	0	N/A	N/A
	2	154438821	A	G	intronic	Cbfa2t2	.	.	.	REDI	repetitive	4	0.75	7	0.286	4	0	1	0	4	0	3	0	7	0	4	0	11	0	13	0	7	0	N/A	N/A
	2	154447902	A	G	intronic	Cbfa2t2	.	.	.	REDI	repetitive	3	0	4	0.5	3	0.333	4	0.5	5	0	4	0	4	0	8	0	2	0	2	0	4	0	5	0
	2	154450880	A	G	intronic	Cbfa2t2	.	.	.	REDI	repetitive	5	0.6	4	0	7	0	2	0	1	0	1	0	14	0	5	0	9	0	7	0	6	0	4	0
	2	154505655	A	G	intronic	Cbfa2t2	.	.	.	REDI	repetitive	1	0	3	0.667	4	0	N/A	N/A	2	0	2	0	9	0	1	0	5	0	9	0	4	0	4	0
	2	154523270	A	G	intronic	Cbfa2t2	.	.	.	REDI	repetitive	3	0	3	0	3	0	N/A	N/A	1	0	3	0	5	0	2	0	7	0	5	0.4	5	0	1	0
	2	154537442	A	G	UTR3	Cbfa2t2	.	.	.	REDI	repetitive	79	0	55	0	67	0	48	0	44	0	57	0	49	0	24	0.25	39	0	39	0.282	25	0	18	0
	2	154537909	A	G	UTR3	Cbfa2t2	.	.	.	REDI	repetitive	76	0	66	0	67	0	42	0	48	0	51	0	75	0.133	30	0.167	67	0	49	0.245	46	0	20	0
	2	154537930	A	G	UTR3	Cbfa2t2	RADAR	repetitive	DARNED	REDI	repetitive	78	0	68	0	68	0	49	0	51	0	50	0	82	0.159	34	0.147	61	0	56	0.339	49	0	20	0
	2	154586335	T	C	downstream	Pxmp4	.	.	.	REDI	repetitive	9	0	2	0	5	0.4	4	0	8	0	8	0	15	0.4	21	0.429	27	0.37	36	0.361	12	0.5	16	0.25
	2	154586387	T	C	downstream	Pxmp4	.	.	.	REDI	repetitive	5	0.4	1	0	1	0	N/A	N/A	2	0	2	0.5	10	0.3	5	1	11	0.455	19	0.526	8	0.375	5	0.4
	2	154586610	T	C	downstream	Pxmp4	.	.	.	REDI	repetitive	25	0	15	0	19	0	12	0	19	0	15	0	26	0	49	0.184	28	0	62	0	38	0	10	0
	2	154587098	T	C	UTR3	Pxmp4	.	.	.	REDI	repetitive	10	0.2	3	0	4	0	2	0	5	0	1	0	7	0	14	0	9	0	26	0	6	0	4	0
	2	154587159	T	C	UTR3	Pxmp4	.	.	.	REDI	repetitive	18	0	6	0	11	0	3	0	11	0	8	0	21	0	23	0	12	0.167	38	0	10	0	7	0.286
	2	154587160	T	C	UTR3	Pxmp4	.	.	.	REDI	repetitive	18	0.222	6	0	11	0.182	3	0	11	0	8	0	19	0.368	21	0.286	12	0.417	34	0.265	10	0.4	7	0.286
	2	154664839	A	G	intronic	Chmp4b	.	.	.	REDI	repetitive	5	0	1	0	3	0.667	N/A	N/A	2	0	4	0	15	0	14	0	5	0	21	0	1	0	6	0
	2	154679763	A	G	intronic	Chmp4b	.	.	.	REDI	repetitive	3	0	4	0	1	0	1	0	2	0	1	0	5	0	5	0.4	11	0	13	0	2	0	7	0
	2	155141111	A	G	intronic	Itch	.	.	.	REDI	repetitive	2	0	9	0.444	15	0	14	0	5	0	6	0	15	0	15	0	8	0	19	0	13	0	5	0
	2	155141141	A	G	intronic	Itch	.	.	.	REDI	repetitive	2	0	12	0.333	12	0	12	0	3	0	6	0	18	0	17	0	11	0	24	0	12	0	6	0
	2	155208055	A	G	intronic	Itch	.	.	.	REDI	repetitive	7	0	7	0	7	0.286	3	0.667	11	0	11	0	17	0	9	0	11	0	32	0	6	0	10	0
	2	155208241	A	G	intronic	Itch	.	.	.	REDI	repetitive	6	0.5	9	0.667	10	0	9	0	7	0	9	0	2	0.5	11	0.273	9	0.222	24	0	14	0	9	0
	2	155301544	T	C	intronic	Pigu	.	.	.	REDI	repetitive	2	0	3	1	4	0	N/A	N/A	N/A	N/A	N/A	N/A	5	0	N/A	N/A	3	0	6	0	N/A	N/A	N/A	N/A
	2	155384663	A	G	intronic	Trp53inp2	.	.	.	REDI	repetitive	8	0	10	0.4	9	0	5	0	5	0	4	0	N/A	N/A	N/A	N/A	1	0	N/A	N/A	N/A	N/A	2	0
	2	155434608	T	C	intronic	Ncoa6	.	.	.	REDI	repetitive	1	0	3	0	3	0.667	3	0	1	0	2	0	4	0	4	0	8	0	10	0	3	0	2	0
	2	155434652	T	C	intronic	Ncoa6	.	.	.	REDI	repetitive	2	0	2	0	2	1	3	0	1	0	1	0	5	0	6	0	7	0	15	0	2	0	2	0
	2	155446662	T	C	intergenic	Ncoa6;Ggt7	.	.	.	REDI	repetitive	1	0	5	0.6	N/A	N/A	N/A	N/A	3	0	1	0	9	0	3	0	3	0	4	0	2	0	1	0
	2	155977525	A	G	intronic	Cep250	.	.	.	REDI	repetitive	2	0	N/A	N/A	N/A	N/A	1	0	1	0	1	0	5	0.4	1	0	4	0	3	0	N/A	N/A	1	0
	2	156395482	A	G	intergenic	2900097C17Rik;Epb41l1	RADAR	repetitive	DARNED	REDI	repetitive	2	0	4	0.5	4	0	5	0	1	0	1	0	N/A	N/A	N/A	N/A	N/A	N/A	N/A	N/A	N/A	N/A	N/A	N/A
	2	156395502	A	G	intergenic	2900097C17Rik;Epb41l1	RADAR	repetitive	DARNED	REDI	repetitive	2	0	4	0.5	2	0	4	0	1	0	1	0	N/A	N/A	N/A	N/A	N/A	N/A	N/A	N/A	N/A	N/A	N/A	N/A
	2	156732948	A	G	intronic	Dlgap4	.	.	.	REDI	repetitive	19	0.316	12	0.333	11	0	10	0	6	0	2	0	2	0	2	0	3	0	5	0	4	0	2	0
	2	156860513	T	C	ncRNA_intronic	5430405H02Rik	.	.	.	REDI	repetitive	2	0	4	0	6	0	N/A	N/A	3	0	2	0	7	0	9	0	3	0.667	8	0	6	0	8	0
	2	156871524	A	G	intronic	1110008F13Rik	RADAR	repetitive	DARNED	REDI	repetitive	6	0.333	3	0	2	0	2	0	6	0	7	0	33	0	16	0	24	0	38	0	14	0	8	0
	2	156871525	A	G	intronic	1110008F13Rik	.	.	.	REDI	repetitive	6	0.333	3	0	2	0	2	0	6	0	7	0	33	0	16	0	24	0	38	0	14	0	8	0
	2	156953835	T	C	intronic	Ndrg3	.	.	.	REDI	repetitive	N/A	N/A	2	0	2	0	N/A	N/A	4	0	1	0	6	0.333	N/A	N/A	4	0	2	0	3	0	1	0
	2	156953918	T	C	intronic	Ndrg3	.	.	.	REDI	repetitive	1	0	1	0	3	0	N/A	N/A	1	0	2	0	6	0	1	0	6	0	1	1	3	0	3	0
	2	156953932	T	C	intronic	Ndrg3	.	.	.	REDI	repetitive	1	0	1	0	2	0	N/A	N/A	2	0	2	0	6	0	1	0	5	0	2	1	3	0	2	0
	2	156954362	T	C	intronic	Ndrg3	.	.	.	REDI	repetitive	1	0	1	0	N/A	N/A	2	1	N/A	N/A	1	0	6	0	1	0	5	0	1	0	1	0	4	0
	2	157013791	T	C	UTR3	Soga1	.	.	.	REDI	repetitive	54	0	58	0	53	0	29	0	54	0	32	0	10	0	4	0.5	2	0	4	0	6	0	7	0
	2	157054474	T	C	intronic	Soga1	.	.	.	REDI	non-repetitive	6	0	7	0	7	0	5	0.4	2	0	3	0	N/A	N/A	N/A	N/A	1	0	1	0	3	0	N/A	N/A
	2	157126482	T	C	intronic	Samhd1	.	.	.	REDI	repetitive	2	1	N/A	N/A	N/A	N/A	N/A	N/A	N/A	N/A	N/A	N/A	4	0	3	0	1	0	3	0	4	0	5	0
	2	157130928	T	C	intronic	Samhd1	.	.	.	REDI	repetitive	N/A	N/A	N/A	N/A	N/A	N/A	1	0	1	0	1	0	1	0	4	0.5	1	0	2	0	N/A	N/A	N/A	N/A
	2	157199860	T	C	intronic	Rbl1	.	.	.	REDI	repetitive	N/A	N/A	N/A	N/A	5	0	N/A	N/A	2	0	3	0	10	0	8	0.25	22	0	22	0	5	0	6	0
	2	157199913	T	C	intronic	Rbl1	.	.	.	REDI	repetitive	N/A	N/A	1	0	5	0	2	0	2	0	3	0	16	0	8	0.25	20	0	19	0	8	0	7	0.286
	2	157400317	A	G	intergenic	Manbal;Src	.	.	.	REDI	repetitive	1	0	N/A	N/A	2	1	N/A	N/A	1	0	1	0	N/A	N/A	1	0	N/A	N/A	N/A	N/A	N/A	N/A	N/A	N/A
	2	157400371	A	G	intergenic	Manbal;Src	.	.	.	REDI	repetitive	2	1	1	0	1	0	N/A	N/A	N/A	N/A	N/A	N/A	N/A	N/A	2	0	N/A	N/A	N/A	N/A	N/A	N/A	N/A	N/A
	2	157558110	T	C	exonic	Blcap	.	.	.	REDI	non-repetitive	485	0.206	434	0.159	351	0	266	0	516	0	487	0	12	0	19	0	22	0	24	0	13	0	12	0
	2	157558140	T	C	exonic	Blcap	RADAR	non-repetitive	DARNED	REDI	non-repetitive	428	0.325	412	0.303	331	0	259	0	488	0	445	0	11	0	16	0	25	0	21	0	17	0	11	0
	2	157558149	T	C	exonic	Blcap	RADAR	non-repetitive	DARNED	REDI	non-repetitive	422	0.391	388	0.369	318	0	262	0	477	0	437	0	13	0.385	15	0.333	24	0	22	0.136	15	0	10	0
	2	157558645	T	C	intronic	Blcap	RADAR	non-repetitive	DARNED	REDI	non-repetitive	12	0.5	8	1	5	0	2	0	11	0	7	0	6	0.5	3	0.667	5	0	8	0.25	3	0	2	0
	2	158031574	A	G	intronic	Rprd1b	.	.	.	REDI	repetitive	2	1	5	0	5	0	N/A	N/A	1	0	N/A	N/A	10	0	1	0	6	0	6	0	4	0	7	0
	2	158031591	A	G	intronic	Rprd1b	.	.	.	REDI	repetitive	3	1	4	0	5	0	N/A	N/A	N/A	N/A	N/A	N/A	9	0	1	0	6	0	6	0	2	0	7	0
	2	158377502	A	G	intronic	Snhg11	.	.	.	REDI	repetitive	42	0	25	0.24	29	0	28	0	33	0	25	0	N/A	N/A	N/A	N/A	N/A	N/A	N/A	N/A	N/A	N/A	2	0
	2	158377531	A	G	intronic	Snhg11	.	.	.	REDI	repetitive	62	0.161	46	0	41	0	26	0	50	0	35	0	N/A	N/A	N/A	N/A	N/A	N/A	N/A	N/A	1	0	2	0
	2	158380424	A	G	intronic	Snhg11	.	.	.	REDI	repetitive	25	0	14	0.143	13	0	25	0.2	22	0	8	0	N/A	N/A	N/A	N/A	N/A	N/A	N/A	N/A	N/A	N/A	N/A	N/A
	2	158380509	A	G	intronic	Snhg11	.	.	.	REDI	repetitive	28	0.393	11	0.364	18	0	23	0	19	0	16	0	N/A	N/A	N/A	N/A	N/A	N/A	N/A	N/A	N/A	N/A	1	0
	2	158384953	A	G	UTR3	Snhg11	RADAR	repetitive	.	REDI	repetitive	354	0.39	299	0.398	295	0.353	229	0.332	323	0	251	0	5	0	2	0	2	0	6	1	21	0	2	0
	2	158433951	A	G	intronic	Ralgapb	.	.	.	REDI	repetitive	N/A	N/A	1	0	3	0.667	3	0	1	0	N/A	N/A	3	0	3	0	1	0	2	0	2	0	2	0
	2	158434051	A	G	intronic	Ralgapb	.	.	.	REDI	repetitive	1	0	N/A	N/A	6	0	3	0	N/A	N/A	2	0	7	0	6	0.333	6	0	4	0	8	0	3	0
	2	158480774	A	G	intronic	Ralgapb	.	.	.	REDI	repetitive	5	0	6	0.333	1	0	3	0	1	0	2	0	4	0	3	0	9	0	4	0	3	0	3	0
	2	158480780	A	G	intronic	Ralgapb	.	.	.	REDI	repetitive	5	0	7	0.286	1	0	6	0	1	0	1	0	3	0	3	0	9	0	7	0	3	0	3	0
	2	158488572	A	G	intronic	Ralgapb	.	.	.	REDI	repetitive	5	0.6	4	0.25	2	1	7	0.286	4	0	N/A	N/A	11	0	5	0	8	0	14	0	6	0	2	0
	2	158488610	A	G	intronic	Ralgapb	.	.	.	REDI	repetitive	7	0.714	6	0.333	2	1	3	0	3	0	2	0	13	0	8	0	12	0	15	0	7	0	3	0
	2	158583472	T	C	intergenic	Arhgap40;Gm14204	.	.	.	REDI	repetitive	2	1	1	0	N/A	N/A	3	0	1	0	2	0	N/A	N/A	N/A	N/A	N/A	N/A	N/A	N/A	N/A	N/A	N/A	N/A
	2	158586614	T	C	intergenic	Arhgap40;Gm14204	.	.	.	REDI	repetitive	3	1	N/A	N/A	N/A	N/A	2	0	1	0	N/A	N/A	N/A	N/A	N/A	N/A	N/A	N/A	N/A	N/A	N/A	N/A	1	0
	2	158765532	A	G	UTR3	Ppp1r16b	.	.	.	REDI	repetitive	46	0	46	0	36	0	18	0	36	0	45	0	33	0	82	0	27	0	82	0.207	32	0	26	0
	2	158827521	A	G	intronic	Dhx35	.	.	.	REDI	non-repetitive	14	0	17	0	9	0	14	0.143	12	0	6	0	14	0	4	0	9	0	2	0	16	0	4	0
	2	160674900	A	G	intronic	Top1	.	.	.	REDI	repetitive	2	0	2	1	6	0	4	0	2	0	7	0	10	0	5	0	9	0	16	0	7	0	9	0
	2	160688509	A	G	intronic	Top1	.	.	.	REDI	repetitive	4	0	3	0	5	0	8	0.25	3	0	6	0	8	0	15	0	6	0	19	0	9	0	10	0
	2	160688655	A	G	intronic	Top1	.	.	.	REDI	repetitive	6	0	7	0.143	4	0	9	0	5	0	7	0	10	0	23	0.217	6	0	31	0	5	0	11	0
	2	160688656	A	G	intronic	Top1	.	.	.	REDI	repetitive	6	0	7	0.429	4	0	9	0	5	0	7	0	11	0	23	0.217	6	0	31	0	5	0	11	0
	2	160688669	A	G	intronic	Top1	.	.	.	REDI	repetitive	7	0	8	0.25	4	0	7	0	6	0	7	0	11	0	28	0	7	0	31	0	5	0	11	0
	2	160688692	A	G	intronic	Top1	.	.	.	REDI	repetitive	14	0	9	0	6	0	5	0.4	8	0	9	0	15	0	40	0	9	0	33	0	4	0	15	0
	2	160720117	A	G	intronic	Top1	.	.	.	REDI	repetitive	3	0	2	1	2	0	5	0	5	0	3	0	1	0	1	0	1	0	5	0	3	0	3	0
	2	161946356	T	C	intronic	Ptprt	.	.	.	REDI	repetitive	N/A	N/A	2	1	1	0	1	0	N/A	N/A	4	0	N/A	N/A	N/A	N/A	N/A	N/A	N/A	N/A	N/A	N/A	1	0
	2	162298319	T	C	intronic	Ptprt	.	.	.	REDI	non-repetitive	2	0	2	1	1	0	N/A	N/A	N/A	N/A	1	0	N/A	N/A	N/A	N/A	N/A	N/A	N/A	N/A	3	0	N/A	N/A
	2	162605425	T	C	intronic	Ptprt	.	.	.	REDI	non-repetitive	3	0.667	2	0	5	0	1	0	1	0	N/A	N/A	N/A	N/A	N/A	N/A	N/A	N/A	N/A	N/A	N/A	N/A	N/A	N/A
	2	162976385	A	G	intergenic	L3mbtl1;Sgk2	RADAR	non-repetitive	DARNED	REDI	non-repetitive	12	0.167	9	0	11	0	5	0.8	11	0	10	0	N/A	N/A	N/A	N/A	N/A	N/A	N/A	N/A	1	0	1	0
	2	163047730	A	G	intergenic	Ift52;Mybl2	.	.	.	REDI	repetitive	12	0.25	11	0.636	12	0	14	0	5	0	4	0	4	0	1	0	3	0	7	0.429	6	0.333	3	0
	2	163047784	A	G	intergenic	Ift52;Mybl2	RADAR	repetitive	DARNED	REDI	repetitive	8	0.375	10	0	9	0	11	0	9	0	8	0	4	0	3	0	2	0	4	0.25	6	0	4	0
	2	163049650	A	G	intergenic	Ift52;Mybl2	.	.	.	REDI	repetitive	16	0	19	0	17	0	12	0.167	13	0	16	0	3	0	2	0	2	0	10	0	6	0	9	0
	2	163446977	A	G	intronic	Gdap1l1	.	.	.	REDI	repetitive	2	0	5	0.6	4	0	3	0	5	0	10	0	N/A	N/A	N/A	N/A	N/A	N/A	N/A	N/A	N/A	N/A	1	0
	2	163467539	T	C	intergenic	Gdap1l1;Fitm2	RADAR	repetitive	DARNED	REDI	repetitive	17	0.412	33	0.576	20	0.15	20	0.4	32	0	26	0	2	0	5	0	5	0	7	0	9	0	1	0
	2	163468444	T	C	downstream	Fitm2	.	.	.	REDI	repetitive	18	0.444	12	0.167	25	0	14	0	18	0	14	0	5	0	6	0	2	0	14	0	13	0	1	0
	2	163468870	T	C	UTR3	Fitm2	.	.	.	REDI	repetitive	35	0	20	0	20	0	29	0	26	0	26	0	7	0	7	0	14	0.214	9	0	11	0	4	0
	2	163627155	T	C	intronic	Serinc3	.	.	.	REDI	repetitive	16	0.188	6	0	10	0	10	0	19	0	22	0	65	0	29	0	37	0	41	0	72	0	49	0
	2	163627742	T	C	intronic	Serinc3	.	.	.	REDI	repetitive	14	0.214	6	0	2	0	3	0	8	0	10	0	19	0	18	0	25	0	23	0	37	0	24	0
	2	164066034	T	C	intronic	Tomm34	.	.	.	REDI	repetitive	6	0	6	0.5	2	0	3	0	8	0	8	0	10	0	7	0.286	4	0	14	0	13	0	9	0
	2	164066035	T	C	intronic	Tomm34	.	.	.	REDI	repetitive	6	0.833	6	0.5	2	0	3	0	8	0	8	0	8	0.375	7	0.286	4	0	14	0	14	0	7	0
	2	164504781	A	G	intronic	Pigt	.	.	.	REDI	repetitive	N/A	N/A	2	1	N/A	N/A	3	0	2	0	1	0	1	0	1	0	4	0	2	0	2	0	2	0
	2	164753271	A	G	intronic	Dnttip1	.	.	.	REDI	repetitive	2	0	4	0.5	4	0	3	0	1	0	2	0	3	1	6	0.5	8	0	8	0	8	0	2	0
	2	164753281	A	G	intronic	Dnttip1	.	.	.	REDI	repetitive	2	0	5	0.4	4	0	4	0	1	0	2	0	6	0	8	0	10	0	10	0	10	0	2	0
	2	164753328	A	G	intronic	Dnttip1	.	.	.	REDI	repetitive	N/A	N/A	4	0	1	0	3	0.667	4	0	7	0	8	0	1	0	7	0	8	0	9	0	2	0
	2	164766866	A	G	intronic	Dnttip1	.	.	.	REDI	repetitive	6	0	3	0	6	0	5	0	2	0	5	0	8	0	8	0.25	9	0	9	0	4	0	N/A	N/A
	2	164766869	A	G	intronic	Dnttip1	.	.	.	REDI	repetitive	6	0	3	0	5	0	5	0	2	0	5	0	7	0	8	0.25	9	0	9	0	4	0	N/A	N/A
	2	164799084	T	C	intronic	Acot8	.	.	.	REDI	repetitive	7	0.429	N/A	N/A	4	0	1	0	3	0	2	0	9	0	4	0	2	0	8	0	6	0	3	0
	2	164850067	T	C	intronic	Pltp	RADAR	repetitive	DARNED	REDI	repetitive	N/A	N/A	2	0	N/A	N/A	N/A	N/A	N/A	N/A	N/A	N/A	4	0.5	2	0	9	0	4	0.5	7	0	9	0
	2	164914016	A	G	intergenic	Zfp335;Mmp9	RADAR	repetitive	DARNED	REDI	repetitive	1	0	7	0.286	2	0	5	0	5	0	7	0	14	0	17	0	17	0	30	0	15	0	11	0
	2	164985869	A	G	intronic	Slc12a5	.	.	.	REDI	repetitive	3	0.667	1	0	2	0	4	0	6	0	1	0	N/A	N/A	N/A	N/A	N/A	N/A	N/A	N/A	N/A	N/A	N/A	N/A
	2	165030461	T	C	intronic	Ncoa5	.	.	.	REDI	non-repetitive	13	0.385	9	0	9	0	14	0	15	0	13	0	15	0	17	0	14	0	27	0	6	0	11	0
	2	165030486	T	C	intronic	Ncoa5	.	.	.	REDI	non-repetitive	20	0	6	0.5	8	0	14	0	22	0	23	0	11	0	13	0	18	0	30	0	7	0	9	0
	2	165031851	T	C	intronic	Ncoa5	RADAR	non-repetitive	DARNED	REDI	non-repetitive	16	0	16	0	12	0	14	0.143	17	0	44	0	39	0	17	0	24	0	25	0	26	0	17	0
	2	165031861	T	C	intronic	Ncoa5	RADAR	non-repetitive	DARNED	REDI	non-repetitive	12	0.5	15	0.4	13	0	15	0	15	0	41	0	35	0	18	0	24	0	23	0	25	0	17	0
	2	165789337	T	C	intronic	Zmynd8	.	.	.	REDI	repetitive	4	0.5	1	0	N/A	N/A	N/A	N/A	N/A	N/A	N/A	N/A	7	0	7	0	8	0	4	0	1	0	3	0
	2	165843236	T	C	intronic	Zmynd8	RADAR	repetitive	DARNED	REDI	repetitive	7	0	10	0.2	7	0	9	0	9	0	7	0	24	0	13	0	12	0	14	0	15	0	11	0
	2	165843626	T	C	intronic	Zmynd8	RADAR	repetitive	DARNED	REDI	repetitive	8	0	9	0	9	0	4	0.75	14	0	10	0	5	0	10	0	17	0	13	0	12	0	14	0
	2	165872242	T	C	intronic	Zmynd8	RADAR	repetitive	DARNED	REDI	repetitive	7	0.429	6	0	6	0.333	1	0	7	0	4	0	6	0	4	0	2	0	7	0	4	0	3	0
	2	165872314	T	C	intronic	Zmynd8	RADAR	repetitive	DARNED	REDI	repetitive	5	0	2	0	4	0.75	N/A	N/A	3	0	3	0	8	0	7	0	4	0	13	0	2	0	2	0
	2	166703756	T	C	ncRNA_intronic	Mir6364	.	.	.	REDI	repetitive	3	0	2	1	1	0	N/A	N/A	1	0	1	0	14	0	10	0	9	0	16	0	6	0	N/A	N/A
	2	166796963	A	G	UTR3	Trp53rkb	RADAR	repetitive	DARNED	REDI	repetitive	15	0	7	0.286	17	0	11	0	18	0	7	0	6	0	3	0	4	0	3	0	11	0	N/A	N/A
	2	166847419	A	G	intronic	Arfgef2	.	.	.	REDI	repetitive	3	0	N/A	N/A	N/A	N/A	1	0	1	0	2	0	5	0.4	N/A	N/A	2	0	2	0	5	0	N/A	N/A
	2	166847420	A	G	intronic	Arfgef2	.	.	.	REDI	repetitive	3	0	N/A	N/A	N/A	N/A	1	0	1	0	2	0	5	0.4	N/A	N/A	2	0	2	0	5	0	N/A	N/A
	2	166882632	A	G	intronic	Arfgef2	.	.	.	REDI	non-repetitive	N/A	N/A	3	0.667	N/A	N/A	N/A	N/A	N/A	N/A	1	0	3	0	3	0	1	0	6	0	1	0	2	0
	2	166882633	A	G	intronic	Arfgef2	.	.	.	REDI	non-repetitive	N/A	N/A	3	0.667	N/A	N/A	N/A	N/A	N/A	N/A	1	0	3	0	3	0	1	0	6	0	1	0	2	0
	2	166882671	A	G	intronic	Arfgef2	.	.	.	REDI	repetitive	N/A	N/A	3	0	N/A	N/A	N/A	N/A	1	0	1	0	2	0	6	0.333	4	0	8	0	3	0	2	0
	2	166882681	A	G	intronic	Arfgef2	.	.	.	REDI	repetitive	N/A	N/A	3	0	N/A	N/A	N/A	N/A	1	0	1	0	2	0	5	0.4	5	0	10	0	3	0	2	0
	2	166886876	A	G	intronic	Arfgef2	.	.	.	REDI	repetitive	N/A	N/A	N/A	N/A	2	0	N/A	N/A	1	0	N/A	N/A	2	1	2	0	2	0	5	0	N/A	N/A	N/A	N/A
	2	166939357	A	G	intronic	Cse1l	.	.	.	REDI	repetitive	4	0	3	0	3	0	6	0.5	8	0	4	0	16	0	16	0	10	0	27	0	6	0	N/A	N/A
	2	166943713	A	G	intronic	Cse1l	.	.	.	REDI	repetitive	14	0.143	12	0	9	0	16	0	19	0	11	0	7	0	5	0	15	0	9	0	12	0	10	0
	2	166958896	T	C	intronic	Stau1	.	.	.	REDI	repetitive	8	0	4	0.5	5	0	5	0	9	0	1	0	6	0	7	0	6	0	19	0	10	0	5	0
	2	166958938	T	C	intronic	Stau1	.	.	.	REDI	repetitive	7	0.571	4	0.5	6	0	4	0	6	0	2	0	7	0	7	0	6	0	13	0	9	0	5	0
	2	167053962	T	C	intronic	Znfx1	.	.	.	REDI	repetitive	2	1	2	0	4	0.5	N/A	N/A	N/A	N/A	4	0	8	0.25	3	0	3	0	6	0	2	0	2	0
	2	167053982	T	C	intronic	Znfx1	.	.	.	REDI	repetitive	3	0.667	2	0	4	0	N/A	N/A	1	0	4	0	8	0.25	4	0	2	0	7	0	2	0	4	0
	2	167448668	A	G	intronic	Slc9a8	.	.	.	REDI	repetitive	3	0.667	1	0	1	0	3	0	2	0	1	0	4	0	N/A	N/A	3	0	1	0	6	0	4	0
	2	167469397	A	G	intronic	Slc9a8	RADAR	repetitive	DARNED	REDI	repetitive	1	0	5	0	N/A	N/A	2	0.5	3	0	4	0	7	0	1	0	8	0	8	0	5	0	2	0
	2	167478451	A	G	intergenic	Slc9a8;Spata2	.	.	.	REDI	repetitive	2	1	N/A	N/A	5	0	2	0	2	0	2	0	4	0	3	0	N/A	N/A	3	0	4	0	3	0
	2	167506404	A	G	intronic	Rnf114	RADAR	repetitive	DARNED	REDI	repetitive	9	0.444	10	0	2	0	7	0	8	0	4	0	9	0	8	0.25	9	0	25	0	8	0	9	0
	2	167506414	A	G	intronic	Rnf114	RADAR	repetitive	DARNED	REDI	repetitive	9	0.222	8	0	2	0	4	0	7	0	5	0	7	0	10	0	6	0	21	0	8	0	11	0
	2	167506418	A	G	intronic	Rnf114	RADAR	repetitive	DARNED	REDI	repetitive	9	0.222	9	0	2	0	4	0	7	0	5	0	7	0	10	0	6	0	25	0	8	0	12	0
	2	167937964	A	G	intronic	Ptpn1	.	.	.	REDI	repetitive	2	0	N/A	N/A	3	0	1	0	2	0	3	0	10	0.3	2	0	7	0	5	0	8	0	1	0
	2	168193622	T	C	ncRNA_intronic	Dpm1-adnp	RADAR	repetitive	DARNED	REDI	repetitive	26	0.269	34	0	18	0	18	0	27	0	39	0	103	0	66	0	66	0	80	0	65	0	33	0
	2	168215962	T	C	ncRNA_intronic	Dpm1-adnp	RADAR	repetitive	DARNED	REDI	repetitive	17	0	18	0.167	6	0	11	0	4	0	12	0	13	0	3	0	5	0	11	0	15	0	7	0
	2	168227031	T	C	ncRNA_intronic	Dpm1-adnp	.	.	.	REDI	repetitive	9	0.222	9	0	4	0	7	0.429	8	0	8	0	15	0	11	0	6	0	11	0	10	0	11	0
	2	168227045	T	C	ncRNA_intronic	Dpm1-adnp	.	.	.	REDI	repetitive	4	0.25	9	0	4	0	8	0.25	7	0	7	0	15	0	12	0	4	0	10	0	11	0	13	0
	2	168234910	A	G	intergenic	Mocs3;Kcng1	RADAR	repetitive	DARNED	REDI	repetitive	15	0.333	12	0.5	11	0	11	0	5	0	13	0	3	0	2	0	3	0	6	0	3	0	2	0
	2	168235276	A	G	intergenic	Mocs3;Kcng1	RADAR	repetitive	DARNED	REDI	repetitive	15	0	17	0	18	0	13	0	8	0	11	0	5	0	5	0.4	1	0	5	0	4	0.5	4	0
	2	168735965	T	C	intronic	Atp9a	.	.	.	REDI	repetitive	2	0	4	0.75	1	0	1	0	5	0	4	0	1	0	N/A	N/A	2	0	2	0	2	0	3	0
	2	168737125	T	C	intronic	Atp9a	.	.	.	REDI	repetitive	7	0.714	5	0	10	0	5	0	7	0	10	0	N/A	N/A	1	0	N/A	N/A	N/A	N/A	2	0	1	0
	2	170071343	A	G	upstream	A630075F10Rik	RADAR	non-repetitive	DARNED	REDI	repetitive	6	0.5	4	0	4	0	3	0	9	0	11	0	N/A	N/A	N/A	N/A	1	0	N/A	N/A	1	0	3	0
	2	172470220	A	G	downstream	Rtfdc1	.	.	.	REDI	repetitive	14	0	11	0.182	5	0	20	0.25	17	0	10	0	12	0	10	0	19	0	15	0	22	0	17	0
	2	173674881	A	G	intronic	Rab22a	.	.	.	REDI	repetitive	2	0	2	0	1	0	3	0	2	0	2	0	12	0.167	2	0	11	0	12	0	11	0	10	0
	2	174273056	T	C	intergenic	Mir298;Nespas	.	.	.	REDI	repetitive	7	0.286	8	0	3	0	7	0	8	0	11	0	14	0	3	0	5	0	6	0	15	0	5	0
	2	174327901	A	G	UTR5	Gnas	RADAR	non-repetitive	DARNED	REDI	non-repetitive	98	0.214	63	0.222	74	0	52	0	69	0	98	0	15	0	22	0	20	0	10	0	25	0	4	0
	2	178296270	A	G	intronic	Phactr3	.	.	.	REDI	repetitive	2	0	8	0.375	N/A	N/A	N/A	N/A	2	0	1	0	N/A	N/A	N/A	N/A	N/A	N/A	N/A	N/A	N/A	N/A	1	0
	2	179527736	A	G	intronic	Cdh4	.	.	.	REDI	repetitive	4	0.5	4	0	2	0	3	0	3	0	4	0	1	0	N/A	N/A	3	0	1	0	N/A	N/A	N/A	N/A
	2	180073938	A	G	intronic	Mtg2	RADAR	repetitive	DARNED	REDI	repetitive	4	0.75	2	0	3	0	2	0	N/A	N/A	1	0	6	0	5	0	2	0	5	0	3	0	1	0
	2	180123020	A	G	intronic	Osbpl2	.	.	.	REDI	repetitive	2	0	6	0.333	3	0	4	0	3	0	7	0	8	0	5	0	9	0	3	0	3	0	3	0
	2	180160929	A	G	intronic	Osbpl2	.	.	.	REDI	repetitive	5	0	7	0.571	2	0	5	0.4	6	0	5	0	1	0	3	0	6	0	11	0	6	0	1	0
	2	180706021	T	C	intronic	Dido1	RADAR	repetitive	DARNED	REDI	repetitive	6	0.333	3	0	6	0	4	0	2	0	6	0	9	0	19	0.158	11	0	16	0	15	0	3	0
	2	180974825	A	G	intronic	Arfgap1	RADAR	repetitive	DARNED	REDI	repetitive	6	0	11	0.455	3	0	6	0	6	0	9	0	17	0	7	0	22	0	7	0	20	0	8	0
	2	180975681	A	G	intronic	Arfgap1	.	.	.	REDI	repetitive	8	0	8	0	5	0.4	11	0	19	0	20	0	22	0	12	0	27	0	12	0	33	0	23	0
	2	181271450	T	C	intronic	Gmeb2	.	.	.	REDI	repetitive	6	0.333	1	0	N/A	N/A	4	0	7	0	5	0	16	0	2	0	6	0	6	0	10	0	3	0
	2	181281087	T	C	intronic	Gmeb2	.	.	.	REDI	repetitive	1	0	2	0	1	0	3	0.667	2	0	1	0	13	0.385	3	0	11	0	4	0	5	0	8	0
	2	181281169	T	C	intronic	Gmeb2	.	.	.	REDI	non-repetitive	5	0	5	0.8	4	0	3	0	3	0	3	0	29	0	5	0	14	0	6	0	8	0	5	0
	2	181290640	A	G	intergenic	Gmeb2;Stmn3	.	.	.	REDI	repetitive	5	0.4	11	0	7	0	3	0	6	0	11	0	10	0	14	0	5	0	18	0	7	0	6	0
	2	181291316	A	G	intergenic	Gmeb2;Stmn3	RADAR	repetitive	DARNED	REDI	repetitive	8	0	14	0.571	8	0	3	0	3	0	4	0	10	0	5	0	1	0	16	0	3	0.667	7	0
	2	181498213	A	G	intronic	Tpd52l2	.	.	.	REDI	repetitive	2	0	N/A	N/A	N/A	N/A	3	0	2	0	5	0	1	0	4	0.5	5	0	N/A	N/A	1	0	6	0
	2	181498214	A	G	intronic	Tpd52l2	.	.	.	REDI	repetitive	2	0	N/A	N/A	N/A	N/A	3	0	2	0	5	0	1	0	4	0.5	6	0	N/A	N/A	1	0	6	0
	2	181499241	A	G	intronic	Tpd52l2	.	.	.	REDI	repetitive	1	0	3	0	1	0	5	0	1	0	3	0	7	0	3	0	3	0	6	0.333	8	0	4	0
	2	181499244	A	G	intronic	Tpd52l2	.	.	.	REDI	repetitive	1	0	3	0	1	0	6	0	1	0	3	0	4	0.25	4	0	3	0	8	0	7	0	4	0
	2	181501566	A	G	intronic	Tpd52l2	.	.	.	REDI	repetitive	6	0.333	8	0	2	0	7	0	3	0	2	0	8	0	1	0	4	0	3	0	6	0	6	0
	2	181501614	A	G	intronic	Tpd52l2	.	.	.	REDI	repetitive	11	0.273	9	0	3	0	9	0.444	6	0	1	0	15	0	4	0	10	0	7	0	15	0	10	0
	2	181505404	A	G	intronic	Tpd52l2	.	.	.	REDI	repetitive	2	0	7	0.286	2	0	2	0	6	0	6	0	10	0	4	0	6	0	8	0	1	0	6	0
	2	181515406	A	G	UTR3	Tpd52l2	RADAR	non-repetitive	.	REDI	non-repetitive	153	0	113	0	130	0	119	0	133	0	157	0	73	0	102	0	80	0	123	0	72	0.194	35	0
	2	181517807	A	G	UTR3	Tpd52l2	.	.	.	REDI	repetitive	42	0	34	0	49	0	37	0	51	0	46	0	24	0	9	0	16	0	19	0	7	0	6	0.333
	2	181517811	A	G	UTR3	Tpd52l2	RADAR	repetitive	DARNED	REDI	repetitive	40	0.325	34	0	48	0	37	0	51	0	44	0	23	0	9	0	17	0	19	0.263	7	0	6	0.333
	2	181517875	A	G	UTR3	Tpd52l2	.	.	.	REDI	repetitive	25	0	25	0	39	0	31	0	42	0	35	0	17	0	7	0	11	0	13	0.154	14	0	5	0
	2	181539373	A	G	intronic	Dnajc5	.	.	.	REDI	repetitive	3	0	3	0.667	1	0	2	0	1	0	N/A	N/A	12	0	6	0	9	0	9	0	7	0	5	0
	2	181555733	A	G	intergenic	Dnajc5;Uckl1	.	.	.	REDI	repetitive	2	1	2	0	N/A	N/A	N/A	N/A	N/A	N/A	N/A	N/A	5	0	1	0	5	0	5	0	3	0	4	0
	2	181587551	T	C	intronic	Zfp512b	.	.	.	REDI	repetitive	14	0.571	13	0.462	12	0	11	0	11	0	10	0	8	0	9	0	9	0	4	0	11	0	6	0
	2	181642007	A	G	intronic	Prpf6	.	.	.	REDI	repetitive	N/A	N/A	5	0	4	0.5	3	0.667	1	0	N/A	N/A	N/A	N/A	4	0	4	0	4	0	1	0	2	0
	2	181653915	A	G	intronic	Prpf6	.	.	.	REDI	repetitive	3	0	9	0.222	2	0	4	0	3	0	4	0	5	0	4	0	7	0	10	0	4	0	1	0
	2	181654477	A	G	intronic	Prpf6	RADAR	repetitive	DARNED	REDI	repetitive	3	0	8	0.25	7	0	7	0	6	0	2	0	9	0	12	0.417	7	0	8	0	13	0	10	0
	2	181654484	A	G	intronic	Prpf6	RADAR	repetitive	DARNED	REDI	repetitive	5	0	9	0.222	5	0	6	0	7	0	2	0	9	0	13	0	9	0	8	0	14	0	10	0
	2	181654488	A	G	intronic	Prpf6	RADAR	repetitive	DARNED	REDI	repetitive	5	0	9	0.222	3	0	6	0	7	0	2	0	9	0	13	0.231	9	0	8	0	13	0	10	0
	2	181830843	A	G	intergenic	Myt1;Pcmtd2	RADAR	non-repetitive	DARNED	REDI	non-repetitive	6	0	15	0.2	9	0	6	0	2	0	12	0	N/A	N/A	N/A	N/A	N/A	N/A	N/A	N/A	1	0	N/A	N/A
	2	181830878	A	G	intergenic	Myt1;Pcmtd2	.	.	.	REDI	non-repetitive	9	0	14	0	10	0.2	8	0	5	0	13	0	N/A	N/A	N/A	N/A	N/A	N/A	N/A	N/A	1	0	1	0
	2	181873125	A	G	intergenic	Polr3k;Gm14496	.	.	.	REDI	repetitive	11	0.455	4	0.75	7	0	5	0	5	0	7	0	15	0	9	0	11	0	23	0	7	0	4	0
	2	181873128	A	G	intergenic	Polr3k;Gm14496	.	.	.	REDI	repetitive	11	0.455	4	0.75	7	0	5	0	6	0	8	0	14	0	11	0	11	0	21	0	7	0	4	0
	2	181877412	A	G	intergenic	Polr3k;Gm14496	.	.	.	REDI	non-repetitive	3	0	1	1	N/A	N/A	3	0	9	0	6	0	13	0	10	0	9	0	21	0	8	0	9	0
	3	5178092	T	C	ncRNA_exonic	2700069I18Rik	.	.	.	REDI	repetitive	10	0	13	0.385	11	0	9	0	12	0	7	0	N/A	N/A	N/A	N/A	N/A	N/A	N/A	N/A	N/A	N/A	N/A	N/A
	3	5178103	T	C	ncRNA_exonic	2700069I18Rik	.	.	.	REDI	repetitive	9	0	10	0	8	0.25	7	0	10	0	6	0	N/A	N/A	N/A	N/A	N/A	N/A	N/A	N/A	N/A	N/A	N/A	N/A
	3	5178108	T	C	ncRNA_exonic	2700069I18Rik	.	.	.	REDI	repetitive	10	0	11	0.364	8	0.25	7	0	9	0	6	0	N/A	N/A	N/A	N/A	N/A	N/A	N/A	N/A	N/A	N/A	N/A	N/A
	3	5178139	T	C	ncRNA_exonic	2700069I18Rik	.	.	.	REDI	repetitive	7	0	7	0.286	6	0	5	0	9	0	5	0	N/A	N/A	N/A	N/A	N/A	N/A	N/A	N/A	N/A	N/A	N/A	N/A
	3	5262214	A	G	intronic	Zfhx4	.	.	.	REDI	repetitive	5	0	5	0.4	5	0	2	0	3	0	3	0	N/A	N/A	N/A	N/A	1	0	1	0	N/A	N/A	N/A	N/A
	3	8844816	T	C	intronic	Mrps28	.	.	.	REDI	repetitive	3	0	2	0	1	0	1	0	N/A	N/A	N/A	N/A	5	0.2	2	0	2	0	6	0	1	0	2	0
	3	10308658	T	C	intergenic	Fabp12;Impa1	RADAR	repetitive	DARNED	REDI	repetitive	5	0	4	0	3	0	4	0.75	3	0	2	0	12	0	1	0	7	0	1	0	4	0	6	0
	3	10308698	T	C	intergenic	Fabp12;Impa1	RADAR	repetitive	DARNED	REDI	repetitive	3	0	3	0	4	0.5	5	0.6	3	0	3	0	14	0	N/A	N/A	3	0	N/A	N/A	4	0	4	0
	3	10308715	T	C	intergenic	Fabp12;Impa1	RADAR	repetitive	DARNED	REDI	repetitive	2	0	2	1	2	0	4	0	3	0	3	0	16	0	N/A	N/A	5	0	1	0	6	0	3	0
	3	10308728	T	C	intergenic	Fabp12;Impa1	RADAR	repetitive	DARNED	REDI	repetitive	1	0	3	1	1	0	3	0	2	0	4	0	13	0.154	N/A	N/A	5	0	2	0	6	0	3	0
	3	10413175	T	C	intergenic	Chmp4c;Snx16	.	.	.	REDI	repetitive	2	1	4	0	1	0	N/A	N/A	2	0	5	0	4	0	3	0	2	0	3	0	6	0	5	0
	3	10414920	T	C	intergenic	Chmp4c;Snx16	.	.	.	REDI	repetitive	5	0	2	1	1	0	2	0	8	0	4	0	3	0	3	0	3	0	1	0	2	0	12	0
	3	13523133	A	G	intronic	Ralyl	.	.	.	REDI	repetitive	3	0.667	5	0	4	0	N/A	N/A	7	0	5	0	N/A	N/A	N/A	N/A	N/A	N/A	N/A	N/A	1	0	N/A	N/A
	3	13544178	A	G	intronic	Ralyl	.	.	.	REDI	repetitive	2	0	N/A	N/A	4	0.5	3	0	1	0	N/A	N/A	N/A	N/A	N/A	N/A	N/A	N/A	N/A	N/A	N/A	N/A	N/A	N/A
	3	13560783	A	G	intronic	Ralyl	RADAR	repetitive	.	REDI	repetitive	6	0.833	4	0.75	9	0	3	0	3	0	4	0	N/A	N/A	N/A	N/A	N/A	N/A	N/A	N/A	N/A	N/A	N/A	N/A
	3	13560810	A	G	intronic	Ralyl	.	.	.	REDI	repetitive	4	0	7	0.286	7	0	3	0	2	0	3	0	N/A	N/A	N/A	N/A	N/A	N/A	N/A	N/A	N/A	N/A	N/A	N/A
	3	13560882	A	G	intronic	Ralyl	.	.	.	REDI	repetitive	5	0	7	0.286	5	0	5	0.4	3	0	5	0	N/A	N/A	N/A	N/A	N/A	N/A	N/A	N/A	1	0	N/A	N/A
	3	13560889	A	G	intronic	Ralyl	.	.	.	REDI	repetitive	5	0	8	0.25	4	0	5	0.4	3	0	5	0	N/A	N/A	N/A	N/A	N/A	N/A	N/A	N/A	1	0	1	0
	3	13566968	A	G	intronic	Ralyl	.	.	.	REDI	repetitive	2	1	4	0	1	0	6	0	4	0	7	0	N/A	N/A	N/A	N/A	N/A	N/A	N/A	N/A	N/A	N/A	N/A	N/A
	3	13569714	A	G	intronic	Ralyl	.	.	.	REDI	repetitive	N/A	N/A	4	0	10	0	2	1	8	0	11	0	N/A	N/A	N/A	N/A	N/A	N/A	N/A	N/A	N/A	N/A	N/A	N/A
	3	13569721	A	G	intronic	Ralyl	.	.	.	REDI	repetitive	N/A	N/A	3	0	9	0	2	1	8	0	9	0	N/A	N/A	N/A	N/A	N/A	N/A	N/A	N/A	N/A	N/A	N/A	N/A
	3	13596820	A	G	intronic	Ralyl	.	.	.	REDI	repetitive	4	0.5	2	0	4	0	3	0	4	0	3	0	N/A	N/A	N/A	N/A	1	0	N/A	N/A	N/A	N/A	1	0
	3	13975657	A	G	intronic	Ralyl	.	.	.	REDI	repetitive	1	1	4	0	1	0	2	0	3	0	5	0	N/A	N/A	N/A	N/A	N/A	N/A	N/A	N/A	N/A	N/A	1	0
	3	13995284	A	G	intronic	Ralyl	.	.	.	REDI	repetitive	N/A	N/A	2	1	N/A	N/A	2	0	3	0	1	0	N/A	N/A	N/A	N/A	N/A	N/A	N/A	N/A	N/A	N/A	N/A	N/A
	3	14179879	A	G	intronic	Ralyl	RADAR	repetitive	DARNED	REDI	repetitive	3	0.667	2	0	9	0	3	0	6	0	5	0	N/A	N/A	N/A	N/A	N/A	N/A	N/A	N/A	N/A	N/A	4	0
	3	14179883	A	G	intronic	Ralyl	RADAR	repetitive	DARNED	REDI	repetitive	3	0.667	2	0	9	0	3	0	6	0	5	0	N/A	N/A	N/A	N/A	N/A	N/A	N/A	N/A	N/A	N/A	4	0
	3	14179966	A	G	intronic	Ralyl	.	.	.	REDI	repetitive	9	0	6	0	13	0.154	4	0	7	0	6	0	N/A	N/A	N/A	N/A	N/A	N/A	N/A	N/A	N/A	N/A	2	0
	3	14179978	A	G	intronic	Ralyl	RADAR	repetitive	DARNED	REDI	repetitive	10	0	6	0	16	0.125	4	0	7	0	5	0	N/A	N/A	N/A	N/A	N/A	N/A	N/A	N/A	N/A	N/A	N/A	N/A
	3	14180200	A	G	intronic	Ralyl	.	.	.	REDI	repetitive	1	0	2	1	2	0	1	0	3	0	3	0	N/A	N/A	N/A	N/A	N/A	N/A	N/A	N/A	N/A	N/A	2	0
	3	16196405	A	G	intronic	Ythdf3	.	.	.	REDI	repetitive	8	0.75	16	0.5	13	0	6	0	13	0	17	0	11	0	21	0	11	0	39	0	20	0	16	0
	3	16196435	A	G	intronic	Ythdf3	.	.	.	REDI	repetitive	9	0	11	0.273	14	0	7	0	8	0	20	0	9	0	18	0	8	0	40	0	25	0	21	0
	3	19224197	T	C	UTR3	Pde7a	.	.	.	REDI	repetitive	36	0	36	0.278	28	0	27	0	29	0	32	0	17	0	10	0	26	0	19	0	21	0	13	0
	3	19238175	T	C	intronic	Pde7a	.	.	.	REDI	non-repetitive	6	0	5	0.6	2	0	2	0	5	0	6	0	7	0	4	0	16	0	8	0	3	0	3	0
	3	22092134	A	G	intronic	Tbl1xr1	.	.	.	REDI	repetitive	4	0.5	2	0	4	0	N/A	N/A	1	0	3	0	33	0	15	0	40	0	38	0	21	0	23	0
	3	22197429	A	G	intronic	Tbl1xr1	.	.	.	REDI	repetitive	5	0.4	5	0.4	7	0	4	0	1	0	3	0	15	0	8	0	17	0	4	0	11	0	6	0
	3	23986580	T	C	intronic	Naaladl2	.	.	.	REDI	repetitive	N/A	N/A	N/A	N/A	N/A	N/A	N/A	N/A	N/A	N/A	N/A	N/A	1	0	N/A	N/A	3	0	2	1	1	0	6	0
	3	25520885	T	C	intronic	Nlgn1	.	.	.	REDI	repetitive	4	0	4	0.5	3	0	N/A	N/A	4	0	4	0	1	0	N/A	N/A	2	0	1	0	1	0	2	1
	3	25558842	T	C	intronic	Nlgn1	.	.	.	REDI	repetitive	2	0	3	0	1	0	3	0.667	1	0	N/A	N/A	2	0	N/A	N/A	N/A	N/A	N/A	N/A	N/A	N/A	N/A	N/A
	3	25565915	T	C	intronic	Nlgn1	.	.	.	REDI	repetitive	1	0	3	0	3	0.667	N/A	N/A	4	0	2	0	2	0	N/A	N/A	N/A	N/A	N/A	N/A	1	0	2	0
	3	25565947	T	C	intronic	Nlgn1	.	.	.	REDI	repetitive	3	0	3	0.667	5	0	N/A	N/A	4	0	3	0	1	0	N/A	N/A	N/A	N/A	N/A	N/A	N/A	N/A	1	0
	3	25566130	T	C	intronic	Nlgn1	.	.	.	REDI	repetitive	7	0	2	0	7	0	2	0	2	0	1	0	2	0	2	1	N/A	N/A	N/A	N/A	N/A	N/A	N/A	N/A
	3	25648448	T	C	intronic	Nlgn1	.	.	.	REDI	repetitive	5	0.4	6	0	9	0	4	0	5	0	3	0	N/A	N/A	1	0	6	0	N/A	N/A	1	0	2	0
	3	25650916	T	C	intronic	Nlgn1	.	.	.	REDI	repetitive	10	0	10	0.2	15	0	13	0	17	0	12	0	7	0	1	0	6	0	2	0	N/A	N/A	N/A	N/A
	3	25650932	T	C	intronic	Nlgn1	.	.	.	REDI	repetitive	8	0	8	0.25	15	0	11	0	15	0	11	0	4	0	1	0	8	0	3	0	N/A	N/A	N/A	N/A
	3	25651102	T	C	intronic	Nlgn1	.	.	.	REDI	repetitive	4	0	11	0.273	3	0	3	0	17	0	15	0	1	0	N/A	N/A	6	0	1	0	N/A	N/A	3	0
	3	25651750	T	C	intronic	Nlgn1	.	.	.	REDI	repetitive	4	0	4	1	4	0	9	0	11	0	6	0	N/A	N/A	N/A	N/A	3	0	N/A	N/A	2	0	5	0
	3	25652992	T	C	intronic	Nlgn1	.	.	.	REDI	repetitive	4	0	7	0	17	0	10	0	15	0	9	0	3	0	1	0	4	0.5	N/A	N/A	1	0	3	0
	3	25653009	T	C	intronic	Nlgn1	.	.	.	REDI	repetitive	4	0	4	0.25	13	0	10	0	13	0	8	0	3	0	1	0	2	0	N/A	N/A	1	0	3	0
	3	25653017	T	C	intronic	Nlgn1	RADAR	repetitive	.	REDI	repetitive	5	0.4	3	0.333	14	0.214	10	0	11	0	6	0	3	0	1	0	N/A	N/A	N/A	N/A	1	0	4	0
	3	25653110	T	C	intronic	Nlgn1	.	.	.	REDI	repetitive	10	0	6	0	15	0	10	0.2	13	0	12	0	1	0	1	0	6	0	N/A	N/A	2	0	4	0
	3	25653115	T	C	intronic	Nlgn1	.	.	.	REDI	repetitive	10	0	5	0	13	0	9	0.111	13	0	12	0	1	0	1	0	7	0	N/A	N/A	2	0	4	0
	3	25716479	T	C	intronic	Nlgn1	.	.	.	REDI	non-repetitive	4	0	3	0.667	6	0	2	0	9	0	8	0	1	0	4	0	2	0	4	0	3	0	5	0
	3	25728040	T	C	intronic	Nlgn1	.	.	.	REDI	repetitive	2	0	2	1	5	0	N/A	N/A	3	0	2	0	N/A	N/A	N/A	N/A	N/A	N/A	N/A	N/A	1	0	1	0
	3	25735501	T	C	intronic	Nlgn1	.	.	.	REDI	repetitive	11	0	10	0	15	0	14	0	12	0	4	0	4	0.5	N/A	N/A	2	0	N/A	N/A	2	0	3	0
	3	25756152	T	C	intronic	Nlgn1	RADAR	non-repetitive	DARNED	REDI	non-repetitive	10	0	5	0	6	0.667	N/A	N/A	2	0	9	0	1	0	N/A	N/A	N/A	N/A	N/A	N/A	3	0	2	0
	3	25757103	T	C	intronic	Nlgn1	.	.	.	REDI	repetitive	6	0.333	6	0	13	0	9	0	10	0	10	0	2	0	N/A	N/A	2	0	1	0	1	0	5	0
	3	25757130	T	C	intronic	Nlgn1	.	.	.	REDI	repetitive	6	0	4	0.25	12	0.25	7	0	9	0	11	0	2	0	N/A	N/A	2	0	1	0	1	0	5	0
	3	25793133	T	C	intronic	Nlgn1	RADAR	non-repetitive	DARNED	REDI	non-repetitive	6	0	3	0	5	0	1	0	16	0	14	0	1	0	3	0	1	0	5	0.4	1	0	2	0
	3	25793134	T	C	intronic	Nlgn1	RADAR	non-repetitive	DARNED	REDI	non-repetitive	6	0.667	3	0	5	0	1	0	16	0	14	0	1	0	3	0	1	0	6	0	1	0	2	0
	3	25793725	T	C	intronic	Nlgn1	RADAR	non-repetitive	DARNED	REDI	non-repetitive	11	0	14	0	11	0	8	0	12	0	9	0	1	0	3	0	7	0	4	0.75	1	0	2	0
	3	25908538	T	C	intronic	Nlgn1	.	.	.	REDI	repetitive	5	0.4	7	0	6	0	2	0	5	0	6	0	1	0	1	0	2	0	3	0	5	0	N/A	N/A
	3	25969814	T	C	intronic	Nlgn1	.	.	.	REDI	repetitive	5	0	4	0	7	0	7	0	8	0	1	0	5	0	N/A	N/A	1	0	2	0.5	N/A	N/A	N/A	N/A
	3	25969822	T	C	intronic	Nlgn1	.	.	.	REDI	repetitive	5	0	5	0	7	0	7	0	9	0	1	0	5	0.4	N/A	N/A	1	0	2	0.5	N/A	N/A	N/A	N/A
	3	25969851	T	C	intronic	Nlgn1	.	.	.	REDI	repetitive	4	0	4	0	6	0	6	0.333	10	0	1	0	6	0	N/A	N/A	1	0	1	0	N/A	N/A	N/A	N/A
	3	25969878	T	C	intronic	Nlgn1	.	.	.	REDI	repetitive	7	0.143	3	0	6	0	4	0	6	0	N/A	N/A	5	0	N/A	N/A	1	0	N/A	N/A	1	0	N/A	N/A
	3	25969886	T	C	intronic	Nlgn1	.	.	.	REDI	repetitive	8	0.25	3	0	5	0	3	0	5	0	N/A	N/A	4	0	N/A	N/A	1	0	1	0	1	0	N/A	N/A
	3	27623356	T	C	intronic	Fndc3b	.	.	.	REDI	non-repetitive	1	0	N/A	N/A	N/A	N/A	2	1	2	0	1	0	3	0.667	N/A	N/A	N/A	N/A	N/A	N/A	1	0	N/A	N/A
	3	27624796	T	C	intronic	Fndc3b	.	.	.	REDI	non-repetitive	N/A	N/A	N/A	N/A	2	1	4	0	1	0	N/A	N/A	1	0	N/A	N/A	N/A	N/A	N/A	N/A	1	0	3	0
	3	28587460	A	G	intronic	Tnik	.	.	.	REDI	repetitive	6	0	12	0.25	N/A	N/A	1	0	3	0	4	0	3	0	5	0	2	0	3	0	10	0	3	0
	3	28587849	A	G	intronic	Tnik	.	.	.	REDI	repetitive	1	0	N/A	N/A	N/A	N/A	5	0	4	0	3	0	5	0.4	4	0	1	0	5	0	4	0	5	0.4
	3	29197583	A	G	intronic	Egfem1	.	.	.	REDI	non-repetitive	5	0	2	1	1	0	6	0	6	0	4	0	N/A	N/A	N/A	N/A	N/A	N/A	N/A	N/A	1	0	1	0
	3	29257246	A	G	intronic	Egfem1	.	.	.	REDI	repetitive	5	0.4	6	0.333	5	0	1	0	1	0	2	0	N/A	N/A	N/A	N/A	N/A	N/A	1	0	N/A	N/A	N/A	N/A
	3	30804422	A	G	intronic	Sec62	.	.	.	REDI	non-repetitive	2	0	2	1	3	0	1	0	13	0	6	0	1	0	8	0	3	0	5	0	14	0	5	0
	3	30804426	A	G	intronic	Sec62	.	.	.	REDI	non-repetitive	2	0	2	1	3	0	1	0	13	0	5	0	1	0	10	0	3	0	5	0	15	0	5	0
	3	30804917	A	G	intronic	Sec62	.	.	.	REDI	non-repetitive	3	1	1	0	2	0	6	0	11	0	7	0	13	0	27	0	29	0	31	0	16	0	17	0
	3	30805020	A	G	intronic	Sec62	.	.	.	REDI	non-repetitive	4	0.75	3	0	1	0	4	0	9	0	4	0	10	0	25	0	15	0	37	0	13	0	12	0
	3	31003095	A	G	intronic	Prkci	.	.	.	REDI	repetitive	2	1	2	1	3	0	1	0	4	0	1	0	3	0	1	0	4	0	2	0	5	0	6	0
	3	31241864	T	C	intronic	Slc7a14	.	.	.	REDI	repetitive	2	0.5	N/A	N/A	N/A	N/A	1	0	N/A	N/A	5	0	N/A	N/A	N/A	N/A	N/A	N/A	N/A	N/A	1	0	N/A	N/A
	3	31988196	A	G	intronic	Kcnmb2	.	.	.	REDI	non-repetitive	N/A	N/A	4	0.5	1	0	1	0	1	0	2	0	2	0	N/A	N/A	N/A	N/A	N/A	N/A	N/A	N/A	N/A	N/A
	3	32336519	T	C	UTR3	Zmat3	.	.	.	REDI	non-repetitive	26	0	13	0	17	0	11	0	13	0	10	0	13	0	7	0.286	17	0.294	13	0.308	3	0	9	0
	3	32512075	A	G	intronic	Zfp639	RADAR	repetitive	DARNED	REDI	repetitive	19	0.263	15	0.533	17	0.176	10	0.4	20	0	18	0	6	0	11	0	13	0	9	0	10	0	2	0
	3	32555954	A	G	intronic	Mfn1	RADAR	repetitive	DARNED	REDI	repetitive	24	0.167	13	0.308	20	0	9	0.222	15	0	11	0	7	0	3	0	3	0	3	0	7	0	2	0
	3	32556483	A	G	intronic	Mfn1	RADAR	repetitive	DARNED	REDI	repetitive	14	0.429	9	0.222	6	0	7	0	10	0	7	0	5	0	1	0	5	0	2	0	2	0	N/A	N/A
	3	32556566	A	G	intronic	Mfn1	RADAR	repetitive	DARNED	REDI	repetitive	24	0.25	21	0.286	20	0	14	0	16	0	12	0	6	0	2	0	5	0	4	0	3	0	3	0
	3	32558988	A	G	intronic	Mfn1	.	.	.	REDI	non-repetitive	26	0	18	0.222	11	0	9	0	13	0	8	0	6	0	15	0	16	0	17	0	5	0	N/A	N/A
	3	32561471	A	G	exonic	Mfn1	RADAR	non-repetitive	DARNED	REDI	non-repetitive	104	0.163	106	0.208	70	0.229	46	0.13	136	0	150	0	55	0	30	0	54	0	58	0	38	0	33	0
	3	32561485	A	G	exonic	Mfn1	RADAR	non-repetitive	DARNED	REDI	non-repetitive	113	0	127	0.157	75	0.147	51	0.176	130	0	146	0	52	0	28	0	50	0	58	0	40	0	36	0
	3	32579740	A	G	downstream	Mfn1	.	.	.	REDI	repetitive	26	0	41	0	27	0	29	0	32	0	32	0	5	0	12	0.167	11	0	9	0	10	0	8	0
	3	32582400	T	C	intergenic	Mfn1;Gnb4	.	.	.	REDI	repetitive	41	0.244	40	0.15	61	0	34	0	38	0	48	0	15	0	8	0	17	0	9	0	8	0	7	0
	3	33108151	T	C	intronic	Pex5l	.	.	.	REDI	repetitive	3	0.667	3	0	1	0	2	0	1	0	2	0	1	0	N/A	N/A	N/A	N/A	N/A	N/A	2	0	N/A	N/A
	3	34421489	A	G	intergenic	Dnajc19;Sox2ot	.	.	.	REDI	non-repetitive	3	0.667	2	0	N/A	N/A	1	0	1	0	1	0	N/A	N/A	N/A	N/A	N/A	N/A	N/A	N/A	N/A	N/A	1	0
	3	34421490	A	G	intergenic	Dnajc19;Sox2ot	.	.	.	REDI	non-repetitive	3	0.667	2	0	N/A	N/A	1	0	1	0	1	0	N/A	N/A	N/A	N/A	N/A	N/A	N/A	N/A	N/A	N/A	1	0
	3	34446863	A	G	intergenic	Dnajc19;Sox2ot	.	.	.	REDI	repetitive	5	0.4	5	0	4	0	3	0	3	0	3	0	N/A	N/A	N/A	N/A	N/A	N/A	N/A	N/A	2	0	N/A	N/A
	3	34683033	A	G	intergenic	Sox2ot;Gm3143	.	.	.	REDI	repetitive	10	0	4	0.75	2	0	3	0	12	0	5	0	N/A	N/A	N/A	N/A	N/A	N/A	N/A	N/A	1	0	1	0
	3	34683074	A	G	intergenic	Sox2ot;Gm3143	.	.	.	REDI	repetitive	15	0.333	3	0.667	8	0	1	0	13	0	5	0	N/A	N/A	N/A	N/A	N/A	N/A	N/A	N/A	1	0	3	0
	3	34683076	A	G	intergenic	Sox2ot;Gm3143	.	.	.	REDI	repetitive	13	0.385	3	0.667	8	0	1	0	13	0	5	0	N/A	N/A	N/A	N/A	N/A	N/A	N/A	N/A	1	0	3	0
	3	35807522	A	G	intronic	Atp11b	.	.	.	REDI	repetitive	5	0.6	8	0	7	0	6	0	1	0	2	0	21	0.19	16	0	19	0	22	0	5	0	20	0
	3	35808049	A	G	intronic	Atp11b	RADAR	repetitive	DARNED	REDI	repetitive	6	0	8	0.25	9	0	7	0	7	0	3	0	19	0.158	14	0	24	0	25	0	30	0	23	0
	3	35808055	A	G	intronic	Atp11b	RADAR	repetitive	DARNED	REDI	repetitive	6	0	8	0	8	0	7	0	6	0	3	0	21	0.238	15	0	24	0	24	0	30	0	21	0
	3	35808056	A	G	intronic	Atp11b	RADAR	repetitive	DARNED	REDI	repetitive	6	0	8	0	8	0	7	0	6	0	3	0	21	0.333	15	0	24	0	24	0	30	0	21	0
	3	35808141	A	G	intronic	Atp11b	RADAR	repetitive	DARNED	REDI	repetitive	1	0	6	0.333	6	0	10	0	3	0	N/A	N/A	19	0	10	0	12	0	21	0	21	0	8	0
	3	35899293	T	C	intronic	Dcun1d1	.	.	.	REDI	repetitive	N/A	N/A	5	0.4	N/A	N/A	2	0	1	0	3	0	9	0	8	0	20	0	18	0	9	0	3	0
	3	36092451	A	G	UTR3	Acad9	.	.	.	REDI	repetitive	8	0.375	9	0	4	0.5	11	0.545	15	0	16	0	4	0	4	0	7	0	7	0	13	0	6	0
	3	36093531	A	G	downstream	Acad9	.	.	.	REDI	repetitive	4	0.75	1	0	2	0	4	0	3	0.667	3	0	1	0	N/A	N/A	2	0	N/A	N/A	N/A	N/A	5	0
	3	36093626	A	G	downstream	Acad9	RADAR	repetitive	DARNED	REDI	repetitive	7	0	2	1	1	0	3	0	2	0	1	0	3	0	1	0	5	0	2	0	2	0	2	0
	3	36093687	A	G	downstream	Acad9	.	.	.	REDI	repetitive	4	0	1	0	3	0	3	0	5	0	2	0	3	0	1	0	3	0	4	0.5	3	0	1	0
	3	36093688	A	G	downstream	Acad9	RADAR	repetitive	DARNED	REDI	repetitive	4	0	1	0	3	0	3	0	5	0	2	0	3	0	1	0	3	0	4	0.5	3	0	1	0
	3	36093777	A	G	downstream	Acad9	RADAR	repetitive	DARNED	REDI	repetitive	2	0	2	0	5	0.6	N/A	N/A	4	0	6	0	3	0	N/A	N/A	N/A	N/A	N/A	N/A	1	0	2	0
	3	36093796	A	G	downstream	Acad9	RADAR	repetitive	DARNED	REDI	repetitive	2	0	4	0	5	0.6	1	0	4	0	8	0	3	0	1	0	N/A	N/A	N/A	N/A	N/A	N/A	2	0
	3	37561039	A	G	intronic	Spata5	.	.	.	REDI	non-repetitive	N/A	N/A	1	0	1	0	1	0	N/A	N/A	N/A	N/A	2	0	6	0	2	0	8	0.25	3	0	3	0
	3	37561040	A	G	intronic	Spata5	.	.	.	REDI	non-repetitive	N/A	N/A	1	0	1	0	1	0	N/A	N/A	N/A	N/A	2	0	6	0	2	0	8	0.25	3	0	3	0
	3	38465113	T	C	intronic	Ankrd50	.	.	.	REDI	repetitive	2	0	8	0	1	0	1	0	2	0	4	0	15	0	10	0.4	12	0	25	0	4	0	5	0
	3	38465237	T	C	intronic	Ankrd50	.	.	.	REDI	repetitive	5	0	7	0.286	N/A	N/A	3	0	3	0	4	0	15	0.133	19	0	12	0	25	0	7	0	11	0
	3	40751879	A	G	intronic	Hspa4l	.	.	.	REDI	repetitive	4	0	5	0	8	0.5	4	0	9	0	10	0	12	0	10	0	6	0	19	0	5	0	6	0
	3	40752409	A	G	intronic	Hspa4l	.	.	.	REDI	repetitive	14	0.571	9	0.556	5	0.6	3	0	15	0	20	0	7	0	6	0	5	0	20	0	9	0	11	0
	3	40871465	T	C	ncRNA_intronic	Gm2011	.	.	.	REDI	repetitive	3	0.333	5	0	3	0	2	0	1	0	4	0	3	0	4	0	2	0	5	0	10	0	3	0
	3	40871466	T	C	ncRNA_intronic	Gm2011	.	.	.	REDI	repetitive	3	0.333	6	0	3	0	2	0	1	0	4	0	3	0	4	0	2	0	5	0	10	0	3	0
	3	40872890	T	C	ncRNA_intronic	Gm2011	.	.	.	REDI	repetitive	10	0	2	1	8	0	2	0	1	0	3	0	15	0	10	0	9	0	18	0	7	0	8	0
	3	40874565	T	C	ncRNA_intronic	Gm2011	RADAR	repetitive	DARNED	REDI	repetitive	4	0	3	0	8	0.5	4	0	5	0	5	0	19	0	10	0	13	0	18	0	7	0	10	0
	3	40874637	T	C	ncRNA_intronic	Gm2011	RADAR	repetitive	.	REDI	repetitive	6	0	2	0	3	0	5	0	5	0	5	0	19	0	8	0.375	14	0	14	0	7	0	2	0
	3	40874763	T	C	ncRNA_intronic	Gm2011	.	.	.	REDI	repetitive	2	1	4	1	7	0	3	0	6	0	3	0	11	0.182	8	0	15	0	15	0	8	0	4	0
	3	40954589	A	G	intronic	Larp1b	.	.	.	REDI	repetitive	5	0	2	0	4	0.5	N/A	N/A	N/A	N/A	N/A	N/A	1	0	N/A	N/A	1	0	3	0	2	0	2	0
	3	41727545	T	C	intronic	Sclt1	.	.	.	REDI	repetitive	3	0	9	0.444	1	0	4	0	3	0	5	0	4	0	1	0	N/A	N/A	N/A	N/A	2	0	N/A	N/A
	3	41727585	T	C	intronic	Sclt1	.	.	.	REDI	repetitive	2	0	6	0.333	1	0	2	0	3	0	3	0	3	0	N/A	N/A	N/A	N/A	N/A	N/A	1	0	N/A	N/A
	3	41728769	T	C	intronic	Sclt1	.	.	.	REDI	repetitive	5	0	5	0.6	4	0	1	0	4	0	4	0	3	0	5	0	2	0	3	0	3	0	1	0
	3	41728773	T	C	intronic	Sclt1	.	.	.	REDI	repetitive	5	0	5	0.4	4	0	1	0	4	0	4	0	3	0	5	0	2	0	3	0	3	0	1	0
	3	51226105	A	G	intronic	Noct	.	.	.	REDI	repetitive	17	0.765	7	1	13	0.154	9	0	9	0	16	0	6	0	20	0.4	3	0	28	0.25	4	0	3	0
	3	51226120	A	G	intronic	Noct	.	.	.	REDI	repetitive	18	0	8	0	13	0	9	0	10	0	19	0	5	0	20	0.15	3	0	33	0	5	0	5	0
	3	51235561	A	G	intronic	Noct	.	.	.	REDI	repetitive	10	0	3	0.333	11	0	5	0	10	0	8	0	9	0	5	0	4	0	18	0	5	0	4	0
	3	51235742	A	G	intronic	Noct	RADAR	repetitive	DARNED	REDI	repetitive	7	0.714	6	0.333	18	0	8	0	8	0	8	0	8	0	12	0	6	0	16	0	2	0	5	0
	3	51235933	A	G	intronic	Noct	.	.	.	REDI	repetitive	18	0	7	0.571	4	0	10	0	8	0	14	0	10	0	3	0	7	0	10	0	5	0	3	0
	3	51273665	T	C	intronic	Elf2	.	.	.	REDI	repetitive	2	1	2	0	4	0	1	0	2	0	9	0	9	0	3	0	6	0	18	0	10	0	6	0
	3	51286904	T	C	intronic	Elf2	.	.	.	REDI	repetitive	1	0	2	1	1	0	N/A	N/A	1	0	2	0	4	0	3	0	N/A	N/A	4	0	2	0	3	0
	3	51297929	T	C	intronic	Elf2	.	.	.	REDI	repetitive	3	0	4	0.5	2	0	3	0	1	0	2	0	5	0	2	0	5	0	12	0	7	0	5	0
	3	51407230	T	C	intronic	Ndufc1	.	.	.	REDI	repetitive	3	0.333	6	0	12	0	2	0	8	0	2	0	8	0	4	0	9	0	10	0	9	0	5	0
	3	51458197	A	G	intronic	Naa15	.	.	.	REDI	repetitive	10	0.2	16	0	9	0	15	0	17	0	17	0	38	0	21	0	33	0	24	0	39	0	46	0
	3	51458202	A	G	intronic	Naa15	.	.	.	REDI	repetitive	12	0	13	0.385	9	0	14	0	15	0	16	0	36	0	18	0	34	0	27	0	33	0	46	0
	3	51458219	A	G	intronic	Naa15	.	.	.	REDI	repetitive	13	0.462	11	0.455	10	0	13	0	15	0	17	0	40	0	22	0	36	0	23	0	35	0	48	0
	3	51534913	T	C	intronic	Setd7	.	.	.	REDI	repetitive	11	0	7	0.429	7	0	6	0	7	0	9	0	16	0	10	0	9	0	29	0	13	0	14	0
	3	51538420	T	C	intronic	Setd7	.	.	.	REDI	repetitive	6	0.333	8	0	4	0	4	0	4	0	1	0	9	0	5	0	3	0	9	0	8	0	6	0
	3	53136665	A	G	intronic	Lhfp	RADAR	repetitive	.	REDI	repetitive	N/A	N/A	5	0.6	4	0	N/A	N/A	1	0	2	0	3	0	N/A	N/A	N/A	N/A	N/A	N/A	2	0	N/A	N/A
	3	54285480	A	G	intronic	Trpc4	.	.	.	REDI	repetitive	2	1	2	0	N/A	N/A	N/A	N/A	N/A	N/A	N/A	N/A	N/A	N/A	N/A	N/A	N/A	N/A	N/A	N/A	N/A	N/A	N/A	N/A
	3	55286693	A	G	intronic	Dclk1	.	.	.	REDI	repetitive	18	0.222	19	0	11	0	7	0	35	0	18	0	2	0	1	0	N/A	N/A	N/A	N/A	2	0	N/A	N/A
	3	55395594	A	G	intronic	Dclk1	.	.	.	REDI	repetitive	11	0.273	3	0	11	0	2	0	10	0	10	0	1	0	1	0	2	0	N/A	N/A	2	0	2	0
	3	55399853	A	G	intronic	Dclk1	.	.	.	REDI	repetitive	3	0	4	0	4	0.5	1	0	7	0	5	0	N/A	N/A	N/A	N/A	1	0	N/A	N/A	N/A	N/A	1	0
	3	55399953	A	G	intronic	Dclk1	.	.	.	REDI	repetitive	2	0	2	1	N/A	N/A	3	0	2	0	1	0	N/A	N/A	1	0	N/A	N/A	1	0	1	0	N/A	N/A
	3	55410716	A	G	intronic	Dclk1	.	.	.	REDI	repetitive	5	0.4	4	0	8	0	4	0	5	0	4	0	N/A	N/A	N/A	N/A	N/A	N/A	N/A	N/A	1	0	1	0
	3	55410855	A	G	intronic	Dclk1	.	.	.	REDI	repetitive	5	0.4	4	0	1	0	4	0	5	0	3	0	N/A	N/A	1	0	N/A	N/A	1	0	2	0	N/A	N/A
	3	55759071	T	C	intronic	Nbea	.	.	.	REDI	repetitive	5	0	N/A	N/A	7	0	4	0	4	0	1	0	4	0.5	N/A	N/A	N/A	N/A	N/A	N/A	N/A	N/A	N/A	N/A
	3	56010406	T	C	intronic	Nbea	.	.	.	REDI	repetitive	5	0.4	5	0	2	0	1	0	6	0	9	0	N/A	N/A	N/A	N/A	1	0	N/A	N/A	3	0	1	0
	3	56010468	T	C	intronic	Nbea	.	.	.	REDI	repetitive	2	1	2	1	4	0	1	0	13	0	6	0	N/A	N/A	N/A	N/A	N/A	N/A	N/A	N/A	2	0	1	0
	3	56012524	T	C	intronic	Nbea	.	.	.	REDI	repetitive	9	0.222	4	0	1	0	1	0	5	0	2	0	N/A	N/A	N/A	N/A	1	0	N/A	N/A	N/A	N/A	N/A	N/A
	3	56099861	T	C	intronic	Nbea	.	.	.	REDI	repetitive	3	0	5	0	5	0.2	4	0	19	0	8	0	1	0	N/A	N/A	3	0	N/A	N/A	2	0	3	0
	3	56102569	T	C	intronic	Nbea	.	.	.	REDI	repetitive	2	0.5	4	0	8	0	3	0	7	0	11	0	4	0	N/A	N/A	3	0	N/A	N/A	3	0	3	0
	3	56102574	T	C	intronic	Nbea	.	.	.	REDI	repetitive	2	0.5	4	0	8	0	2	0	7	0	11	0	5	0	N/A	N/A	3	0	N/A	N/A	2	0	3	0
	3	56102599	T	C	intronic	Nbea	.	.	.	REDI	repetitive	4	0.5	5	0.6	7	0	2	0	6	0	13	0	5	0	1	0	4	0	N/A	N/A	4	0	3	0
	3	56102670	T	C	intronic	Nbea	.	.	.	REDI	repetitive	5	0.4	6	0.5	3	0	5	0	5	0	10	0	2	0	1	0	1	0	N/A	N/A	4	0	3	0
	3	56122367	T	C	intronic	Nbea	.	.	.	REDI	repetitive	8	0	8	0.25	8	0	12	0	7	0	4	0	4	0	N/A	N/A	5	0	N/A	N/A	3	0	3	0
	3	56122368	T	C	intronic	Nbea	.	.	.	REDI	repetitive	8	0	8	0.25	8	0	12	0	7	0	4	0	4	0	N/A	N/A	5	0	N/A	N/A	3	0	3	0
	3	57644374	T	C	UTR3	Commd2	RADAR	repetitive	.	REDI	repetitive	18	0	9	0	13	0	8	0	6	0	2	0	3	0	N/A	N/A	1	0	2	1	2	0	3	0
	3	57644420	T	C	UTR3	Commd2	RADAR	repetitive	.	REDI	repetitive	11	0.636	9	0.556	12	0.167	9	0	6	0	1	0	3	0	N/A	N/A	1	0	2	0	1	0	1	0
	3	57644487	T	C	UTR3	Commd2	RADAR	repetitive	DARNED	REDI	repetitive	7	0.857	13	0.769	4	0	3	0	5	0	3	0	1	0	N/A	N/A	1	0	1	0	1	0	2	0
	3	57644491	T	C	UTR3	Commd2	.	.	.	REDI	repetitive	8	0	13	0.154	4	0	3	0	5	0	3	0	1	0	N/A	N/A	1	0	1	0	1	0	2	0
	3	57645930	T	C	UTR3	Commd2	RADAR	repetitive	DARNED	REDI	repetitive	15	0.267	10	0	13	0.154	2	0	6	0	2	0	8	0	2	0	8	0	6	0	1	0	5	0
	3	58451451	A	G	intronic	Tsc22d2	.	.	.	REDI	repetitive	14	0.143	4	0	5	0	8	0	16	0	8	0	18	0	19	0	5	0	20	0	14	0	7	0
	3	58590823	A	G	UTR3	Selenot	RADAR	.	.	REDI	non-repetitive	217	0	256	0	219	0	183	0	385	0	339	0	216	0	327	0.235	226	0	345	0.188	249	0	146	0
	3	62486387	T	C	intronic	Dhx36	.	.	.	REDI	repetitive	20	0.65	14	0.643	5	0	7	0.286	22	0	9	0	24	0	12	0	24	0	9	0	14	0	12	0
	3	65960598	A	G	intergenic	Ccnl1;Veph1	RADAR	repetitive	DARNED	REDI	repetitive	24	0.125	19	0	15	0	13	0	25	0	23	0	16	0	12	0	7	0.286	15	0	14	0	4	0
	3	65960636	A	G	intergenic	Ccnl1;Veph1	.	.	.	REDI	repetitive	26	0	15	0	15	0	19	0	20	0	19	0	13	0	10	0	6	0	12	0	11	0.182	3	0
	3	67950924	A	G	intronic	Gm21949;Iqcj	.	.	.	REDI	repetitive	4	0.5	N/A	N/A	N/A	N/A	1	0	N/A	N/A	3	0	N/A	N/A	N/A	N/A	N/A	N/A	N/A	N/A	N/A	N/A	N/A	N/A
	3	68238737	A	G	intronic	Gm21949;Schip1	.	.	.	REDI	repetitive	1	1	4	0.75	8	0.5	N/A	N/A	3	0	2	0	N/A	N/A	1	0	1	0	N/A	N/A	1	0	N/A	N/A
	3	68251361	A	G	intronic	Gm21949;Schip1	.	.	.	REDI	repetitive	5	0	3	0	5	0.4	2	0	3	0	2	0	N/A	N/A	N/A	N/A	N/A	N/A	N/A	N/A	N/A	N/A	1	0
	3	68373973	A	G	intronic	Gm21949;Schip1	.	.	.	REDI	repetitive	3	0.667	1	0	1	0	4	0	2	0	1	0	N/A	N/A	N/A	N/A	N/A	N/A	N/A	N/A	N/A	N/A	1	0
	3	68994123	T	C	intronic	Ift80	RADAR	repetitive	DARNED	REDI	repetitive	2	1	1	0	3	0	3	0	6	0	5	0	33	0.455	51	0.176	26	0	78	0	14	0	13	0
	3	68994125	T	C	intronic	Ift80	RADAR	repetitive	DARNED	REDI	repetitive	2	1	1	0	3	0	3	0	6	0	5	0	35	0	54	0	26	0	76	0	14	0	13	0
	3	68994127	T	C	intronic	Ift80	RADAR	repetitive	DARNED	REDI	repetitive	2	1	1	0	3	0	2	0	6	0	5	0	34	0	52	0	23	0	71	0	14	0	13	0
	3	69095937	T	C	intronic	Kpna4	.	.	.	REDI	non-repetitive	N/A	N/A	2	0	6	0	4	0.5	9	0	7	0	25	0.4	49	0.245	11	0	70	0	11	0	23	0
	3	69096133	T	C	intronic	Kpna4	.	.	.	REDI	repetitive	4	0.5	9	0.333	1	0	3	0	6	0	3	0	13	0	20	0	15	0	18	0	12	0	12	0
	3	69096557	T	C	intronic	Kpna4	.	.	.	REDI	non-repetitive	6	0	1	0	3	0	2	0	10	0	4	0	11	0.273	19	0	8	0	37	0	8	0	7	0
	3	69096617	T	C	intronic	Kpna4	.	.	.	REDI	non-repetitive	7	0.286	N/A	N/A	3	0	4	0	15	0	3	0	14	0.214	29	0	7	0	54	0	9	0	13	0
	3	69096624	T	C	intronic	Kpna4	.	.	.	REDI	non-repetitive	8	0.375	N/A	N/A	3	0	5	0	19	0	4	0	13	0.462	27	0.185	8	0	57	0	11	0	13	0
	3	69096647	T	C	intronic	Kpna4	.	.	.	REDI	non-repetitive	10	0	4	0	6	0.333	4	0	15	0	7	0	14	0	29	0	10	0	53	0	11	0	16	0
	3	69120822	T	C	intronic	Kpna4	.	.	.	REDI	repetitive	6	0.5	4	0.5	3	0	7	0	5	0	5	0	55	0	27	0.259	49	0	52	0	33	0	34	0
	3	69120924	T	C	intronic	Kpna4	.	.	.	REDI	non-repetitive	4	0	8	0.25	2	0	4	0	8	0	9	0	41	0	23	0	48	0	45	0	29	0	28	0
	3	69322312	A	G	intronic	Ppm1l	.	.	.	REDI	repetitive	2	1	5	0.6	4	0	1	0	4	0	4	0	2	0	3	0.667	2	0	1	0	1	0	2	0
	3	69322375	A	G	intronic	Ppm1l	.	.	.	REDI	repetitive	1	0	8	0	3	0	1	1	1	0	2	0	5	0	2	0	3	0	2	0	2	0	4	0
	3	69322378	A	G	intronic	Ppm1l	.	.	.	REDI	repetitive	1	0	8	0	3	0	1	1	1	0	1	0	5	0	2	0	3	0	3	0	2	0	3	0
	3	69322387	A	G	intronic	Ppm1l	.	.	.	REDI	repetitive	3	0.667	9	0	3	0	3	0.667	2	0	2	0	5	0	2	0	3	0	3	0	2	0	2	0
	3	73425209	A	G	ncRNA_intronic	4930509J09Rik;Gm20754	.	.	.	REDI	non-repetitive	3	0.667	6	0	5	0	2	0	N/A	N/A	5	0	N/A	N/A	N/A	N/A	N/A	N/A	N/A	N/A	N/A	N/A	N/A	N/A
	3	73601373	A	G	intergenic	Gm20754;Bche	.	.	.	REDI	repetitive	3	0	N/A	N/A	1	1	1	0	2	0	N/A	N/A	N/A	N/A	N/A	N/A	N/A	N/A	N/A	N/A	N/A	N/A	N/A	N/A
	3	76159640	A	G	intronic	Fstl5	.	.	.	REDI	repetitive	2	0	N/A	N/A	2	1	N/A	N/A	4	0	3	0	N/A	N/A	N/A	N/A	N/A	N/A	N/A	N/A	N/A	N/A	N/A	N/A
	3	76163804	A	G	intronic	Fstl5	.	.	.	REDI	repetitive	1	0	2	1	1	0	3	0	3	0	N/A	N/A	N/A	N/A	N/A	N/A	N/A	N/A	N/A	N/A	N/A	N/A	N/A	N/A
	3	76163823	A	G	intronic	Fstl5	.	.	.	REDI	repetitive	N/A	N/A	2	1	1	0	3	0	3	0	N/A	N/A	N/A	N/A	N/A	N/A	N/A	N/A	N/A	N/A	N/A	N/A	N/A	N/A
	3	76176804	A	G	intronic	Fstl5	.	.	.	REDI	repetitive	4	0	2	1	1	0	N/A	N/A	2	0	N/A	N/A	N/A	N/A	N/A	N/A	N/A	N/A	N/A	N/A	N/A	N/A	N/A	N/A
	3	76176814	A	G	intronic	Fstl5	.	.	.	REDI	repetitive	3	0	2	1	1	0	N/A	N/A	2	0	N/A	N/A	N/A	N/A	N/A	N/A	N/A	N/A	N/A	N/A	N/A	N/A	N/A	N/A
	3	76365675	A	G	intronic	Fstl5	.	.	.	REDI	repetitive	1	0	3	0.667	N/A	N/A	2	0	1	0	N/A	N/A	N/A	N/A	N/A	N/A	N/A	N/A	N/A	N/A	1	0	N/A	N/A
	3	76365743	A	G	intronic	Fstl5	.	.	.	REDI	repetitive	N/A	N/A	1	0	2	1	N/A	N/A	1	0	N/A	N/A	N/A	N/A	N/A	N/A	N/A	N/A	N/A	N/A	2	0	N/A	N/A
	3	79456456	T	C	UTR3	Fnip2	.	.	.	REDI	repetitive	75	0.16	77	0	79	0	76	0	63	0	73	0	8	0	8	0	7	0	12	0	11	0	9	0
	3	79600134	A	G	intronic	Ppid	.	.	.	REDI	repetitive	9	0	8	0.25	8	0	7	0	5	0	6	0	14	0	19	0	13	0	20	0	11	0	15	0
	3	80692286	T	C	exonic	Gria2	RADAR	non-repetitive	DARNED	REDI	non-repetitive	169	0.722	166	0.687	116	0.457	125	0.536	349	0	430	0	N/A	N/A	2	0	N/A	N/A	1	0	4	0	1	0
	3	80706543	T	C	intronic	Gria2	RADAR	non-repetitive	DARNED	REDI	non-repetitive	194	0.139	222	0.153	159	0.164	168	0	354	0	406	0	1	0	4	0	1	0	2	0	7	0	N/A	N/A
	3	80706648	T	C	intronic	Gria2	RADAR	non-repetitive	DARNED	REDI	non-repetitive	148	0	152	0.164	113	0.159	135	0.237	314	0	308	0	N/A	N/A	1	0	N/A	N/A	2	0	4	0	N/A	N/A
	3	80706649	T	C	intronic	Gria2	RADAR	non-repetitive	DARNED	REDI	non-repetitive	145	0.497	152	0.474	111	0.441	135	0.578	313	0	308	0	N/A	N/A	1	0	N/A	N/A	2	0	4	0	N/A	N/A
	3	80706650	T	C	intronic	Gria2	RADAR	non-repetitive	DARNED	REDI	non-repetitive	146	0.267	156	0.288	116	0.259	137	0.336	311	0	308	0	N/A	N/A	1	0	N/A	N/A	2	0	4	0	N/A	N/A
	3	80706852	T	C	intronic	Gria2	RADAR	non-repetitive	DARNED	REDI	non-repetitive	138	0.478	131	0.473	80	0.312	113	0.363	193	0	232	0	N/A	N/A	3	0	N/A	N/A	N/A	N/A	6	0	N/A	N/A
	3	80706908	T	C	exonic	Gria2	.	.	.	REDI	non-repetitive	239	0.213	225	0.213	359	0	183	0.262	202	0	225	0	N/A	N/A	3	0	N/A	N/A	1	0	6	0	N/A	N/A
	3	80706912	T	C	exonic	Gria2	RADAR	non-repetitive	DARNED	REDI	non-repetitive	236	0.975	220	0.991	162	0.975	181	0.967	207	0	231	0	N/A	N/A	3	0.667	N/A	N/A	1	0	6	0	N/A	N/A
	3	83913746	T	C	intronic	D930015E06Rik	.	.	.	REDI	non-repetitive	6	0.333	4	0	7	0	N/A	N/A	2	0	3	0	6	0	13	0	15	0	11	0	4	0	6	0
	3	83990792	T	C	intronic	D930015E06Rik	.	.	.	REDI	repetitive	3	0	3	0	1	0	N/A	N/A	2	0	5	0	11	0	15	0.2	10	0	23	0	6	0	7	0
	3	85556512	T	C	intergenic	Mir466k;Gatb	RADAR	repetitive	DARNED	REDI	repetitive	2	1	1	0	1	0	N/A	N/A	1	0	N/A	N/A	N/A	N/A	1	0	1	0	N/A	N/A	N/A	N/A	1	0
	3	87627735	A	G	intronic	Arhgef11	.	.	.	REDI	repetitive	10	0.2	1	0	3	0	3	0	5	0	1	0	3	0	2	0	1	0	7	0	2	0	1	0
	3	87647084	A	G	intronic	Arhgef11	.	.	.	REDI	repetitive	4	0.5	2	0	1	0	3	0	12	0	8	0	7	0	11	0	3	0	12	0	3	0	2	0
	3	87676033	A	G	intronic	Arhgef11	.	.	.	REDI	repetitive	1	0	2	0	1	0	1	0	N/A	N/A	N/A	N/A	N/A	N/A	5	0.4	N/A	N/A	1	0	N/A	N/A	N/A	N/A
	3	87921449	A	G	intronic	Mrpl24	RADAR	repetitive	DARNED	REDI	repetitive	13	0	18	0	13	0.154	15	0	16	0	13	0	27	0	58	0	26	0	73	0	59	0	29	0
	3	87921451	A	G	intronic	Mrpl24	RADAR	repetitive	DARNED	REDI	repetitive	13	0.692	17	0.647	16	0	15	0.133	16	0	13	0	26	0.385	57	0	27	0	73	0	60	0	29	0
	3	87921682	A	G	intronic	Mrpl24	.	.	.	REDI	repetitive	11	0	6	0	11	0	3	0.667	4	0	5	0	10	0	20	0	19	0	41	0	33	0	22	0
	3	87921687	A	G	intronic	Mrpl24	.	.	.	REDI	repetitive	11	0	6	0	11	0	3	0.667	4	0	5	0	10	0	20	0	20	0	38	0	34	0	23	0
	3	87940376	A	G	UTR3	Isg20l2	.	.	.	REDI	repetitive	70	0	62	0	106	0	73	0	76	0	89	0	89	0	159	0.195	96	0	209	0	92	0	69	0
	3	88293947	T	C	intronic	Tsacc	.	.	.	REDI	repetitive	4	0	2	1	N/A	N/A	1	0	N/A	N/A	N/A	N/A	2	0	N/A	N/A	N/A	N/A	3	0	1	0	N/A	N/A
	3	88316404	A	G	intronic	Cct3	.	.	.	REDI	repetitive	6	0.333	3	0	1	0	4	0	7	0	4	0	5	0	7	0	2	0	16	0	1	0	4	0
	3	88330903	A	G	intronic	Tmem79	.	.	.	REDI	repetitive	1	0	1	0	5	0.4	N/A	N/A	2	0	N/A	N/A	N/A	N/A	3	0	4	0	1	0	2	0	2	0
	3	88352181	A	G	intronic	Smg5	RADAR	repetitive	DARNED	REDI	repetitive	27	0.815	22	0.955	13	0.385	14	0.643	20	0	31	0	18	0	29	0	16	0	34	0	11	0	11	0
	3	88352191	A	G	intronic	Smg5	RADAR	repetitive	DARNED	REDI	repetitive	29	0.828	25	0.96	15	0.6	19	0.579	25	0	32	0	22	0.273	27	0	16	0	39	0	11	0	15	0
	3	88352194	A	G	intronic	Smg5	.	.	.	REDI	repetitive	30	0	25	0.28	17	0	21	0	24	0	33	0	24	0	29	0	16	0	39	0	11	0	15	0
	3	88352202	A	G	intronic	Smg5	.	.	.	REDI	repetitive	32	0	31	0	22	0	24	0.208	26	0	36	0	24	0	28	0	24	0	41	0	14	0	18	0
	3	88352225	A	G	intronic	Smg5	.	.	.	REDI	repetitive	32	0	27	0.222	22	0	30	0	23	0	35	0	28	0	33	0	22	0	40	0	17	0	20	0
	3	88352235	A	G	intronic	Smg5	RADAR	repetitive	DARNED	REDI	repetitive	25	0.32	29	0.276	23	0	31	0	24	0	32	0	23	0	33	0	23	0	39	0	17	0	19	0
	3	88352277	A	G	intronic	Smg5	RADAR	repetitive	DARNED	REDI	repetitive	31	0.194	27	0.407	20	0	30	0	30	0	29	0	21	0	30	0	22	0	30	0	15	0	17	0
	3	88352583	A	G	intronic	Smg5	.	.	.	REDI	repetitive	17	0.353	14	0.357	8	0	16	0	19	0	12	0	8	0	9	0	4	0	36	0	11	0	2	0
	3	88352584	A	G	intronic	Smg5	.	.	.	REDI	repetitive	16	0.5	14	0.214	8	0	17	0	18	0	12	0	8	0.25	9	0	4	0	36	0	11	0	2	0
	3	88352589	A	G	intronic	Smg5	.	.	.	REDI	repetitive	14	0.429	12	0.167	8	0	17	0	18	0	12	0	8	0	9	0	4	0	36	0	11	0	2	0
	3	88352643	A	G	intronic	Smg5	RADAR	repetitive	DARNED	REDI	repetitive	11	0.545	6	0.333	14	0	9	0	19	0	17	0	9	0	11	0.182	3	0	19	0	6	0	4	0
	3	88352647	A	G	intronic	Smg5	.	.	.	REDI	repetitive	12	0	9	0	14	0	8	0	19	0	17	0	9	0	12	0.167	2	0	19	0	6	0	4	0
	3	88352662	A	G	intronic	Smg5	.	.	.	REDI	repetitive	18	0	12	0	17	0.235	10	0	25	0	22	0	11	0	13	0	3	0	23	0	9	0	5	0
	3	88352672	A	G	intronic	Smg5	.	.	.	REDI	repetitive	17	0	11	0.273	16	0.125	10	0	25	0	25	0	13	0	13	0	3	0	23	0	9	0	5	0
	3	88352676	A	G	intronic	Smg5	.	.	.	REDI	repetitive	18	0	11	0.273	17	0	11	0	23	0	25	0	13	0	13	0	3	0	23	0	9	0	5	0
	3	88423039	T	C	intronic	Slc25a44	.	.	.	REDI	repetitive	21	0	29	0.207	9	0	19	0	31	0	18	0	8	0	2	0	2	0	13	0	8	0	5	0
	3	88640503	A	G	intronic	Arhgef2	.	.	.	REDI	repetitive	4	0	5	0.4	6	0	3	0	3	0	3	0	10	0	7	0	4	0	18	0	9	0	5	0
	3	88687952	A	G	intronic	2810403A07Rik	.	.	.	REDI	repetitive	11	0.273	17	0.529	15	0	9	0	17	0	16	0	12	0	7	0	8	0	19	0	19	0	13	0
	3	88688594	A	G	intronic	2810403A07Rik	.	.	.	REDI	repetitive	17	0.176	11	0.182	9	0	17	0	22	0	23	0	16	0	14	0	11	0	26	0	12	0	13	0
	3	88688597	A	G	intronic	2810403A07Rik	.	.	.	REDI	repetitive	18	0.389	12	0.333	9	0	18	0	24	0	25	0	17	0	16	0	11	0	30	0	12	0	13	0
	3	88703307	A	G	intronic	2810403A07Rik	.	.	.	REDI	repetitive	20	0	24	0.5	20	0	15	0	16	0	22	0	20	0.3	16	0.5	16	0	39	0	23	0	6	0
	3	88703370	A	G	intronic	2810403A07Rik	RADAR	repetitive	DARNED	REDI	repetitive	28	0	32	0.188	24	0	28	0	22	0	32	0	26	0	27	0.259	21	0	66	0	31	0	16	0
	3	88704183	A	G	intronic	2810403A07Rik	.	.	.	REDI	repetitive	12	0.333	21	0.286	17	0	13	0	25	0	25	0	20	0	22	0	20	0	20	0	18	0	11	0
	3	88721426	A	G	intronic	Rit1	.	.	.	REDI	repetitive	N/A	N/A	1	0	6	0	N/A	N/A	6	0	2	0	1	0	N/A	N/A	3	0	4	0.5	2	0	1	0
	3	88721446	A	G	intronic	Rit1	.	.	.	REDI	repetitive	N/A	N/A	3	0	4	0.5	2	0	6	0	3	0	1	0	1	0	2	0	6	0.167	2	0	1	0
	3	88721469	A	G	intronic	Rit1	.	.	.	REDI	repetitive	N/A	N/A	4	0	3	0	4	0	5	0	2	0	1	0	1	0	1	0	6	0.5	1	0	2	0
	3	88727721	T	C	intronic	Rit1	.	.	.	REDI	repetitive	5	0.6	N/A	N/A	2	0	2	0	1	0	4	0	2	0	2	0	1	0	6	0	1	0	3	0
	3	88731212	A	G	downstream	Rit1	.	.	.	REDI	repetitive	N/A	N/A	5	0.4	N/A	N/A	7	0	6	0	5	0	N/A	N/A	1	0	1	0	1	0	1	0	2	0
	3	88757262	T	C	intronic	Syt11	.	.	.	REDI	repetitive	3	0	7	0.286	3	0	4	0	1	0	3	0	N/A	N/A	N/A	N/A	N/A	N/A	N/A	N/A	N/A	N/A	N/A	N/A
	3	88761156	T	C	intronic	Syt11	.	.	.	REDI	repetitive	11	0.364	3	0	1	0	2	0	3	0	1	0	N/A	N/A	N/A	N/A	N/A	N/A	N/A	N/A	N/A	N/A	1	0
	3	88805076	T	C	ncRNA_intronic	5830417I10Rik	.	.	.	REDI	repetitive	2	0	6	0	5	0.4	4	0	3	0	4	0	6	0	2	0	6	0	1	0	2	0	1	0
	3	88812733	T	C	ncRNA_intronic	5830417I10Rik	.	.	.	REDI	repetitive	10	0	9	0.222	5	0.4	7	0	6	0	5	0	3	0	3	0	2	0	3	0	1	0	1	0
	3	88812781	T	C	ncRNA_intronic	5830417I10Rik	.	.	.	REDI	repetitive	11	0	9	0.667	4	0	7	0	10	0	10	0	4	0	4	0	2	0	3	0	5	0	N/A	N/A
	3	88818028	T	C	ncRNA_intronic	5830417I10Rik	.	.	.	REDI	repetitive	13	0.231	13	0.308	12	0	9	0.222	10	0	24	0	4	0	N/A	N/A	1	0	2	0	4	0	1	0
	3	88818033	T	C	ncRNA_intronic	5830417I10Rik	.	.	.	REDI	repetitive	19	0	15	0.4	11	0	11	0	10	0	25	0	4	0	1	0	1	0	2	0	4	0	1	0
	3	88819245	T	C	ncRNA_intronic	5830417I10Rik	.	.	.	REDI	repetitive	8	0	5	0	13	0.308	8	0	14	0	11	0	4	0	2	0	2	0	1	0	6	0	N/A	N/A
	3	88890504	A	G	intronic	Gon4l	.	.	.	REDI	repetitive	1	0	8	0	2	0	N/A	N/A	N/A	N/A	5	0	10	0	6	0	5	0	10	0.2	3	0	3	0
	3	89025300	A	G	intronic	Ash1l	RADAR	repetitive	.	REDI	repetitive	3	0.667	7	0	5	0	2	0	6	0	6	0	11	0	16	0.188	12	0	28	0	15	0	2	0
	3	89025302	A	G	intronic	Ash1l	.	.	.	REDI	repetitive	3	0.667	7	0	5	0	3	0	6	0	7	0	11	0	16	0.188	12	0	28	0	15	0	1	0
	3	89025489	A	G	intronic	Ash1l	.	.	.	REDI	repetitive	7	0.429	8	0	6	0	4	0	5	0	4	0	16	0	26	0	17	0	23	0	7	0	6	0
	3	89026050	A	G	intronic	Ash1l	.	.	.	REDI	repetitive	6	0	1	0	4	0.25	2	0	7	0	1	0	7	0	12	0	8	0	10	0	7	0	5	0
	3	89031949	A	G	intronic	Ash1l	RADAR	repetitive	DARNED	REDI	repetitive	7	0	6	0.333	2	0	N/A	N/A	1	0	6	0	9	0	12	0	7	0	16	0	4	0	5	0
	3	89037257	A	G	intronic	Ash1l	.	.	.	REDI	repetitive	2	0	5	0.4	3	0	7	0	N/A	N/A	5	0	3	0	13	0	10	0	22	0	4	0	5	0
	3	89038339	A	G	intronic	Ash1l	.	.	.	REDI	repetitive	7	0.286	2	0	N/A	N/A	2	0	N/A	N/A	6	0	10	0	16	0	4	0	14	0	3	0	2	0
	3	89039531	A	G	intronic	Ash1l	.	.	.	REDI	repetitive	1	0	N/A	N/A	3	0	2	0	2	0	1	0	3	0	6	0.333	2	0	7	0	4	0	4	0
	3	89099011	T	C	intronic	Fdps	.	.	.	REDI	repetitive	5	0	10	0.4	6	0	5	0.4	12	0	6	0	1	0	2	0	2	0	4	0	5	0	4	0
	3	89379221	T	C	UTR3	Zbtb7b	.	.	.	REDI	repetitive	3	0	6	0	7	0	5	0	7	0	7	0	6	0	21	0.19	3	0	30	0	6	0	5	0
	3	89379223	T	C	UTR3	Zbtb7b	.	.	.	REDI	repetitive	3	0	6	0	7	0	5	0	7	0	7	0	6	0	22	0.318	3	0	25	0.28	5	0	5	0
	3	89379232	T	C	UTR3	Zbtb7b	.	.	.	REDI	repetitive	4	0	5	0	6	0	5	0	5	0	7	0	6	0	24	0	3	0	26	0.231	5	0	5	0
	3	89379236	T	C	UTR3	Zbtb7b	.	.	.	REDI	repetitive	5	0	5	0	6	0	4	0	5	0	7	0	6	0	20	0.25	3	0	25	0.16	5	0	5	0
	3	89720473	A	G	intronic	Adar	.	.	.	REDI	repetitive	6	0.5	13	0	N/A	N/A	N/A	N/A	N/A	N/A	N/A	N/A	2	0	N/A	N/A	N/A	N/A	2	0	N/A	N/A	N/A	N/A
	3	89767914	T	C	ncRNA_exonic	4632404H12Rik	.	.	.	REDI	repetitive	19	0.158	9	0	7	0	3	0	10	0	11	0	1	0	6	0	7	0	12	0	8	0	4	0
	3	90011216	T	C	intronic	Ubap2l	.	.	.	REDI	repetitive	2	0	11	0.364	2	0	1	0	1	0	6	0	21	0	7	0	13	0	9	0	12	0	4	0
	3	90037706	T	C	intronic	Ubap2l	.	.	.	REDI	repetitive	12	0.167	14	0	10	0	11	0	16	0	14	0	28	0	32	0	31	0	40	0	19	0	18	0
	3	90041907	T	C	intronic	Ubap2l	.	.	.	REDI	repetitive	5	0	9	0.556	8	0	12	0	14	0	21	0	49	0	9	0	41	0	21	0	32	0	17	0
	3	90060617	A	G	intronic	4933434E20Rik	RADAR	repetitive	DARNED	REDI	repetitive	10	0.4	8	0.375	12	0.25	8	0	11	0	6	0	13	0	18	0.167	7	0	34	0	18	0	7	0
	3	90234944	A	G	intronic	Jtb	.	.	.	REDI	repetitive	5	0	5	0.4	5	0	3	0	N/A	N/A	2	0	3	0	1	0	2	0	3	0	4	0	3	0
	3	90302560	A	G	intergenic	Dennd4b;Gatad2b	.	.	.	REDI	repetitive	1	0	4	0.5	2	0	7	0.286	5	0	5	0	12	0.167	7	0	8	0	17	0	7	0	12	0.167
	3	90302563	A	G	intergenic	Dennd4b;Gatad2b	.	.	.	REDI	repetitive	2	0	4	0	2	0	8	0	5	0	5	0	12	0	8	0	6	0	16	0	7	0	12	0.167
	3	90483055	A	G	intronic	Ilf2	.	.	.	REDI	repetitive	19	0	15	0.267	7	0	24	0	16	0	21	0	17	0	6	0	8	0	11	0	18	0	4	0
	3	90483584	A	G	intronic	Ilf2	.	.	.	REDI	repetitive	12	0.25	22	0.182	23	0	17	0	28	0	23	0	19	0	8	0	11	0	6	0	17	0	8	0
	3	94496378	T	C	intergenic	Celf3;Snx27	.	.	.	REDI	repetitive	15	0.2	10	0	9	0.222	12	0	13	0	12	0	9	0	4	0	10	0	4	0	5	0	N/A	N/A
	3	94576031	T	C	intronic	Snx27	.	.	.	REDI	repetitive	8	0.875	3	0	1	0	1	0	N/A	N/A	2	0	5	0	2	0	4	0	2	0	10	0	1	0
	3	94576032	T	C	intronic	Snx27	.	.	.	REDI	repetitive	8	0.875	3	0	1	0	1	0	N/A	N/A	2	0	5	0	1	0	4	0	2	0	10	0	1	0
	3	94576385	T	C	intronic	Snx27	.	.	.	REDI	repetitive	4	0	6	0.5	4	0	2	0	2	0	3	0	4	0	5	0	5	0	13	0	2	0	6	0
	3	94845542	A	G	intronic	Pogz	.	.	.	REDI	repetitive	3	0	2	0	6	0	N/A	N/A	1	0	1	0	5	0	9	0.333	4	0	14	0	5	0	1	0
	3	95032503	T	C	downstream	Psmd4	.	.	.	REDI	repetitive	20	0	19	0.211	16	0	22	0	18	0	23	0	8	0	8	0	7	0	10	0	4	0	4	0
	3	95062113	T	C	intronic	Pip5k1a	.	.	.	REDI	repetitive	7	0	3	1	3	0	N/A	N/A	2	0	N/A	N/A	6	0.333	8	0	6	0	9	0	1	0	N/A	N/A
	3	95083438	T	C	intronic	Pip5k1a	.	.	.	REDI	repetitive	4	0.5	2	0	N/A	N/A	1	0	N/A	N/A	1	0	7	0	2	0	2	0	6	0	2	0	2	0
	3	95083455	T	C	intronic	Pip5k1a	.	.	.	REDI	repetitive	3	0.667	4	0	N/A	N/A	1	0	1	0	1	0	6	0	1	0	1	0	4	0	1	0	1	0
	3	95087278	T	C	intronic	Pip5k1a	.	.	.	REDI	repetitive	4	0	1	0	N/A	N/A	4	0.5	6	0	4	0	12	0	5	0	2	0	4	0	N/A	N/A	5	0
	3	95089958	T	C	intronic	Pip5k1a	.	.	.	REDI	repetitive	3	0	2	0	N/A	N/A	2	0	1	0	1	0	8	0.375	10	0	9	0	11	0	8	0	6	0
	3	95093057	T	C	intronic	Pip5k1a	.	.	.	REDI	repetitive	3	0	N/A	N/A	1	0	N/A	N/A	2	0	1	0	5	0	4	0.5	1	0	9	0	N/A	N/A	1	0
	3	95103563	T	C	intronic	Pip5k1a	RADAR	repetitive	DARNED	REDI	repetitive	3	0	2	0	4	0	3	0	2	0	2	0	2	0	5	0	9	0.444	2	0	1	0	1	0
	3	95116095	A	G	intronic	Vps72	.	.	.	REDI	repetitive	8	0	10	0.5	9	0	3	0	2	0	5	0	3	0	4	0	6	0	3	0	7	0	4	0
	3	95116225	A	G	intronic	Vps72	.	.	.	REDI	repetitive	4	0.75	7	0.286	8	0.25	2	0	N/A	N/A	3	0	2	0	2	0	3	0	5	0	6	0	1	0
	3	95116280	A	G	intronic	Vps72	.	.	.	REDI	repetitive	6	0.5	8	0	9	0	2	0	1	0	6	0	3	0	2	0	2	0	9	0	7	0	3	0
	3	95141141	A	G	intronic	Tnfaip8l2	.	.	.	REDI	repetitive	6	0.333	2	0	3	0	N/A	N/A	N/A	N/A	N/A	N/A	8	0	2	0	4	0	13	0	8	0	4	0
	3	95166702	A	G	intronic	Sema6c	.	.	.	REDI	repetitive	5	0	6	0.333	9	0	3	0	8	0	3	0	N/A	N/A	N/A	N/A	N/A	N/A	2	0	N/A	N/A	3	0
	3	95166704	A	G	intronic	Sema6c	.	.	.	REDI	repetitive	5	0	6	0.333	8	0	3	0	8	0	3	0	N/A	N/A	N/A	N/A	N/A	N/A	2	0	N/A	N/A	3	0
	3	95183503	T	C	UTR3	Gabpb2	RADAR	repetitive	DARNED	REDI	repetitive	10	0	9	0	6	0	5	0	9	0	15	0	59	0	62	0.145	49	0	100	0	54	0	26	0.269
	3	95183561	T	C	UTR3	Gabpb2	RADAR	repetitive	DARNED	REDI	repetitive	14	0.143	14	0.286	14	0	8	0	13	0	20	0	63	0.175	66	0.197	50	0	104	0.144	68	0	24	0.25
	3	95183578	T	C	UTR3	Gabpb2	RADAR	repetitive	DARNED	REDI	repetitive	11	0	15	0.2	15	0	8	0.25	10	0	20	0	66	0	70	0	53	0	94	0	66	0	19	0
[truncated: 10,184 more rows]
